# Supplementary material for: Genome sequencing and analysis of Salmonella enterica subsp. enterica serovar Stanley UPM 517: Insights on its virulence-associated elements and their potentials as vaccine candidates
Source: PeerJ. 2019 Jun 28;7:e6948. doi: 10.7717/peerj.6948 (PMC6601603; doi:10.7717/peerj.6948)
Supplement: Supplemental Information 2 [file peerj-07-6948-s002.xlsx]

## Sheet: stanley_VF
SeqName	Description	Length	#Hits	e-Value	sim mean	Start_in_genome	Stop_in_genome
fig|6666666.332384.peg.32	NP_463763)(clpC) endopeptidase Clp ATP-binding chain C [ClpC (VF0072)]	857	10	0	63.53	24186	21613
fig|6666666.332384.peg.38	VFG039622(gi:161831226)(COXBURSA331_A1987) SMP-30/CGR1 family protein [T4SS effectors (CVF803)]	302	4	6.33e-42	49.73	29783	28875
fig|6666666.332384.peg.40	VFG044185(gi:37676958)(VVA1298) phospho-2-dehydro-3-deoxyheptonate aldolase [vulnibactin (IA023)]	356	2	8.59e-101	64.13	32042	30972
fig|6666666.332384.peg.43	VFG043139(gi:28901366)(scrC) sensory box/GGDEF family protein SrcC [lateral flagella (AI142)]	406	1	3.19e-16	52.43	32993	34213
fig|6666666.332384.peg.50	VFG019156(gi:170755148)(CLD_1633) transporter, HlyC/CorC family [Hemolysin (CVF417)]	413	10	9.85e-38	50.5	39021	40262
fig|6666666.332384.peg.54	VFG037134(gi:313668782)(recN) DNA repair protein [Recombinational repair protein (CVF763)]	553	10	2.57e-125	57.92	42701	44362
fig|6666666.332384.peg.60	VFG037636(gi:213157636)(bap) biofilm-associated protein [Biofilm-associated protein (CVF771)]	3824	10	9.65e-156	43.93	47019	58493
fig|6666666.332384.peg.62	VFG007026(gi:37676694)(rtxB) RTX toxin transporter [RTX toxin (CVF263)]	726	10	2.06e-74	50.36	59964	62144
fig|6666666.332384.peg.63	NP_231090)(rtxD) RTX toxin transporter RtxD [RTX toxin (CVF263)]	396	10	7.47e-35	46.91	62125	63315
fig|6666666.332384.peg.117	VFG043070(gi:16766082)(fljA) phase-1 flagellin repressor [peritrichous flagella (AI139)]	118	1	1.83e-83	98.31	108438	108082
fig|6666666.332384.peg.118	VFG043071(gi:16766083)(fljB) flagellin [peritrichous flagella (AI139)]	332	10	0	80.56	109687	108689
fig|6666666.332384.peg.119	VFG043071(gi:16766083)(fljB) flagellin [peritrichous flagella (AI139)]	111	10	1.79e-56	86.2	110064	109729
fig|6666666.332384.peg.120	VFG042130(gi:13475288)(mlr6326) putative DNA invertase [T3SS (SS026)]	190	1	7.57e-34	58.93	110113	110685
fig|6666666.332384.peg.122	VFG044146(gi:16766085)(iroB) glycosyl transferase [Salmochelin (IA021)]	371	8	0	93.09	111647	112762
fig|6666666.332384.peg.123	VFG044147(gi:16766086)(iroC) ABC transporter protein [Salmochelin (IA021)]	1217	10	0	89.59	112843	116496
fig|6666666.332384.peg.124	VFG044148(gi:16766087)(iroD) enterochelin esterase=-like protein [Salmochelin (IA021)]	414	10	0	70.77	116606	117850
fig|6666666.332384.peg.125	VFG044149(gi:16766088)(iroE) hydrolase [Salmochelin (IA021)]	311	8	0	75.34	117882	118817
fig|6666666.332384.peg.126	VFG044150(gi:228960703)(iroN) outer membrane receptor FepA [Salmochelin (IA021)]	724	10	0	90.37	121033	118859
fig|6666666.332384.peg.128	VFG021009(gi:198243391)(pipB2) effector protein pipB2 [TTSS-2 translocated effectors (CVF035)]	366	10	0	98.38	123172	122072
fig|6666666.332384.peg.129	VFG013079(gi:82524515)(virK) VirK [VirK (CVF483)]	309	4	1.21e-99	67.11	123643	124572
fig|6666666.332384.peg.131	VFG004051(gi:56414739)(mig-14) putative transcriptional regulator [Mig-14 (CVF006)]	298	10	0	98.56	124866	125762
fig|6666666.332384.peg.134	VFG027234(gi:433634040)(mprB) Signal transduction histidine-protein kinase/phosphatase MprB [MprA/B (CVF333)]	471	10	4.65e-20	46.34	129045	127630
fig|6666666.332384.peg.135	VFG027205(gi:507420010)(mprA) two component response transcriptional regulatory protein MprA [MprA/B (CVF333)]	224	10	3.94e-46	62.5	129706	129032
fig|6666666.332384.peg.142	VFG012874(gi:30064027)(ipaH) hypothetical protein [Mxi-Spa TTSS effectors controlled by MxiE (CVF465)]	422	1	0	92.65	134116	135384
fig|6666666.332384.peg.144	VFG044347(gi:307130370)(acsF) 4-aminobutyrate aminotransferase [achromobactin (IA011)]	427	10	1.03e-68	49.68	136869	138152
fig|6666666.332384.peg.164	VFG030684(gi:120405436)(sugC) ABC transporter--like protein [Trehalose-recycling ABC transporter (CVF651)]	400	10	4.63e-53	58.29	151223	152425
fig|6666666.332384.peg.168	VFG012208(gi:117626478)(papX) putative regulator PapX protein [P fimbriae (CVF425)]	176	4	2.33e-31	61.35	156393	156923
fig|6666666.332384.peg.169	VFG036949(gi:385850574)(farA) fatty acid resistance protein A [FarAB (CVF758)]	390	10	2.33e-96	65.2	157050	158222
fig|6666666.332384.peg.170	VFG036972(gi:313667722)(farB) multidrug resistance translocase [FarAB (CVF758)]	512	10	0	74.35	158239	159777
fig|6666666.332384.peg.173	VFG018243(gi:28899311)(luxS) S-ribosylhomocysteinase [Autoinducer-2 (CVF628)]	147	4	2.07e-79	81.4	161985	161542
fig|6666666.332384.peg.179	VFG010907(gi:54296805)(csrA) global regulator CsrA [Carbon storage regulator A (CVF362)]	61	4	9.35e-30	87.61	166128	165943
fig|6666666.332384.peg.184	VFG015349(gi:71734872)(hopAJ2) type III effector HopAJ2 [P. syringae TTSS effectors (CVF534)]	359	5	3.04e-30	50.6	173046	171967
fig|6666666.332384.peg.188	VFG038840(gi:507521851)(flmH) 3-oxoacyl-ACP reductase [Polar flagella (VF0473)]	259	3	8.47e-25	50.71	175217	175996
fig|6666666.332384.peg.191	VFG013481(gi:113461061)(kpsF) polysialic acid capsule expression protein, KpsF/GutQ family protein [LOS (CVF494)]	321	10	9.26e-80	62.05	177396	178361
fig|6666666.332384.peg.192	VFG014394(gi:146282881)(fleR) sigma-54 dependent transcriptional regulator/response regulator FleR [Flagella (CVF521)]	506	10	3e-79	68.47	179878	178358
fig|6666666.332384.peg.215	VFG019760(gi:229588672)(pilR) putative two-component system, response regulator [Type IV pili biosynthesis (CVF518)]	687	10	1.35e-90	62.29	198713	200776
fig|6666666.332384.peg.217	VFG012572(gi:110641374)(sitA) iron transport protein, periplasmic-binding protein [Iron/managanease transport (CVF459)]	305	10	2.1e-176	85.1	201364	202281
fig|6666666.332384.peg.218	VFG034214(gi:218534497)(sitB) SitB protein, iron transport protein, ATP-binding component [Iron/managanease transport (CVF459)]	273	10	3.35e-152	84.87	202278	203099
fig|6666666.332384.peg.219	VFG012582(gi:110641372)(sitC) iron transport protein, inner membrane component [Iron/managanease transport (CVF459)]	286	10	2.79e-177	82.78	203096	203956
fig|6666666.332384.peg.220	VFG034233(gi:387606976)(sitD) iron ABC transporter permease [Iron/managanease transport (CVF459)]	282	10	7.1e-137	82.54	203947	204795
fig|6666666.332384.peg.221	VFG020678(gi:197247666)(avrA) secreted effector protein [TTSS-1 translocated effectors (CVF034)]	279	10	0	84.89	205733	204894
fig|6666666.332384.peg.222	VFG000530(gi:16766172)(sprB) transcriptional regulator [TTSS(SPI-1 encode) (VF0116)]	251	7	0	98.75	206715	205960
fig|6666666.332384.peg.223	VFG003633(gi:56414819)(hilC) possible AraC-family transcriptional regulator [TTSS (SPI-1 encode) (CVF031)]	295	10	0	74.41	207987	207100
fig|6666666.332384.peg.224	VFG003639(gi:62181370)(orgC) putative cytoplasmic protein [TTSS (SPI-1 encode) (CVF031)]	120	8	8.72e-87	98.22	208694	208332
fig|6666666.332384.peg.225	NP_461790)(orgB) type III secretion system stator OrgB [TTSS(SPI-1 encode) (VF0116)]	226	6	8.02e-172	93.54	209461	208781
fig|6666666.332384.peg.226	NP_461791)(orgA) type III secretion system accessory cytosolic protein OrgA [SPI-1 encoded T3SS (SS010)]	192	10	2.47e-139	85.15	209996	209418
fig|6666666.332384.peg.227	NP_461792)(prgK) type III secretion system inner MS ring protein PrgK [TTSS(SPI-1 encode) (VF0116)]	252	10	0	82.41	210747	209989
fig|6666666.332384.peg.228	VFG020385(gi:224584650)(prgJ) cytoplasmic cell invasion protein [TTSS (SPI-1 encode) (CVF031)]	80	7	1.06e-53	86.4	210986	210744
fig|6666666.332384.peg.229	NP_461794)(prgI) type III secretion system needle filament protein PrgI [TTSS(SPI-1 encode) (VF0116)]	80	10	8.57e-55	90.13	211310	211068
fig|6666666.332384.peg.230	VFG003669(gi:62181376)(prgH) cell invasion protein [TTSS (SPI-1 encode) (CVF031)]	354	10	0	99.66	212399	211335
fig|6666666.332384.peg.231	VFG000537(gi:16766181)(hilD) invasion protein regulatory protein [TTSS(SPI-1 encode) (VF0116)]	309	10	0	84.27	212829	213758
fig|6666666.332384.peg.232	VFG020428(gi:194736966)(hilA) invasion protein regulator [TTSS (SPI-1 encode) (CVF031)]	553	8	0	89.5	214849	216510
fig|6666666.332384.peg.233	VFG000539(gi:16766183)(iagB) invasion protein precursor [TTSS(SPI-1 encode) (VF0116)]	160	10	2.94e-118	87.42	216528	217010
fig|6666666.332384.peg.234	VFG020607(gi:194442698)(sptP) effector protein SptP [TTSS-1 translocated effectors (CVF034)]	535	10	0	99.27	218671	217064
fig|6666666.332384.peg.235	NP_461800)(sicP) chaparone for SptP [TTSS(SPI-1 encode) (VF0116)]	130	9	7.68e-92	86.97	219074	218682
fig|6666666.332384.peg.237	VFG003691(gi:16761658)(iacP) acyl carrier protein [TTSS (SPI-1 encode) (CVF031)]	82	6	3.56e-55	93.37	219653	219405
fig|6666666.332384.peg.238	VFG020612(gi:198244466)(sipA) cell invasion protein SipA [TTSS-1 translocated effectors (CVF034)]	670	10	0	99.42	221684	219672
fig|6666666.332384.peg.239	VFG020457(gi:224584661)(sipD) cell invasion protein [TTSS (SPI-1 encode) (CVF031)]	343	10	0	90.17	222779	221748
fig|6666666.332384.peg.240	NP_461805)(sipC/sspC) type III secretion system hydrophilic translocator, pore protein SipC [TTSS(SPI-1 encode) (VF0116)]	409	10	0	78.39	224079	222850
fig|6666666.332384.peg.241	VFG003791(gi:16761662)(sipB) pathogenicity island 1 effector protein [TTSS-1 translocated effectors (CVF034)]	593	10	0	89.5	225888	224107
fig|6666666.332384.peg.242	NP_461807)(sicA) chaparone for SipC and SipB [TTSS(SPI-1 encode) (VF0116)]	165	10	7.84e-124	83.51	226388	225891
fig|6666666.332384.peg.243	NP_461808)(spaS) type III secretion system export apparatus switch protein SpaS [TTSS(SPI-1 encode) (VF0116)]	356	10	0	85.86	227596	226526
fig|6666666.332384.peg.244	NP_461809)(spaR) type III secretion system minor export apparatus protein SpaR [TTSS(SPI-1 encode) (VF0116)]	263	10	0	89.09	228374	227583
fig|6666666.332384.peg.245	NP_461810)(spaQ) type III secretion system minor export apparatus protein SpaQ [TTSS(SPI-1 encode) (VF0116)]	86	10	6.87e-56	80.92	228638	228378
fig|6666666.332384.peg.246	NP_461811)(spaP) type III secretion system minor export apparatus protein SpaP [TTSS(SPI-1 encode) (VF0116)]	224	10	7.11e-165	88.11	229338	228664
fig|6666666.332384.peg.247	NP_461812)(spaO) type III secretion system C ring protein SpaO [TTSS(SPI-1 encode) (VF0116)]	303	10	0	99.74	230239	229328
fig|6666666.332384.peg.248	VFG020521(gi:197247906)(invJ) antigen presentation protein SpaN [TTSS (SPI-1 encode) (CVF031)]	336	10	0	99.52	231249	230239
fig|6666666.332384.peg.249	VFG003736(gi:16761670)(invI) secretory protein (associated with virulence) [TTSS (SPI-1 encode) (CVF031)]	147	7	7.63e-100	92.96	231692	231249
fig|6666666.332384.peg.250	NP_461815)(invC) type III secretion system ATPase InvC [TTSS(SPI-1 encode) (VF0116)]	431	10	0	83.73	232965	231670
fig|6666666.332384.peg.251	NP_461816)(invB) type III secretion system protein InvB [TTSS(SPI-1 encode) (VF0116)]	135	10	3.59e-98	83.7	233369	232962
fig|6666666.332384.peg.252	VFG020561(gi:194449468)(invA) invasion protein InvA [TTSS (SPI-1 encode) (CVF031)]	685	10	0	90.73	235450	233393
fig|6666666.332384.peg.253	NP_461818)(invE) type III secretion system gatekeeper invE [TTSS(SPI-1 encode) (VF0116)]	372	10	0	75.37	236593	235475
fig|6666666.332384.peg.254	VFG020579(gi:194448425)(invG) type III secretion outer membrane pore, YscC/HrcC family [TTSS (SPI-1 encode) (CVF031)]	556	10	0	99.58	238260	236590
fig|6666666.332384.peg.255	VFG020584(gi:197248649)(invF) invasion protein [TTSS (SPI-1 encode) (CVF031)]	249	10	0	83.67	239024	238275
fig|6666666.332384.peg.256	VFG003771(gi:16761677)(invH) cell adherance/invasion protein [TTSS (SPI-1 encode) (CVF031)]	147	8	3.65e-106	98.55	239382	239825
fig|6666666.332384.peg.268	VFG036965(gi:385340745)(farB) antibacterial fatty acid resistance protein B [FarAB (CVF758)]	402	3	8.45e-19	52.91	251303	250095
fig|6666666.332384.peg.269	NP_250948)(ptxR) transcriptional regulator PtxR [pyoverdine (IA001)]	314	1	1.82e-50	55.56	251412	252356
fig|6666666.332384.peg.274	VFG015355(gi:66043732)(hopAN1) type III effector HopAN1 [P. syringae TTSS effectors (CVF534)]	420	3	9.86e-113	63.43	257525	256263
fig|6666666.332384.peg.281	VFG000477(gi:16766230)(rpoS) sigma S (sigma 38) factor of RNA polymerase, major sigmafactor during stationary phase [RpoS (VF0112)]	330	10	0	74.19	263301	262309
fig|6666666.332384.peg.291	VFG015885(gi:71736839)(cysC1) adenylylsulfate kinase [Phytotoxin phaseolotoxin (CVF546)]	201	5	5.53e-73	55.72	269770	269165
fig|6666666.332384.peg.292	VFG016489(gi:47459059)(tuf) elongation factor Tu [EF-Tu (CVF587)]	479	10	4.05e-20	47.25	271196	269757
fig|6666666.332384.peg.305	VFG020657(gi:198243421)(sopD) Sop effector protein SopD [TTSS-1 translocated effectors (CVF034)]	360	10	0	99.29	282875	283957
fig|6666666.332384.peg.316	VFG005579(gi:116516768)(eno) phosphopyruvate hydratase [Streptococcal enolase (CVF153)]	432	6	2.88e-176	71.53	294090	292792
fig|6666666.332384.peg.320	VFG004297(gi:56414899)(steA) putative fimbrial subunit [Ste (CVF023)]	195	8	7.34e-139	69.47	297571	298158
fig|6666666.332384.peg.321	VFG021520(gi:194448292)(steB) fimbrial usher protein [Ste (CVF023)]	881	10	0	99.69	298292	300937
fig|6666666.332384.peg.322	VFG004306(gi:62181461)(steC) putative periplasmic fimbrial chaperone [Ste (CVF023)]	229	10	5.19e-171	81.93	301034	301723
fig|6666666.332384.peg.323	VFG021531(gi:224584743)(steD) fimbrial subunit [Ste (CVF023)]	168	10	3.1e-121	96.38	301743	302249
fig|6666666.332384.peg.324	VFG021540(gi:197248742)(steE) fimbrial subunit [Ste (CVF023)]	156	10	2.39e-113	93.66	302264	302734
fig|6666666.332384.peg.325	VFG021549(gi:198245692)(steF) fimbrial subunit [Ste (CVF023)]	178	10	4.24e-131	89.33	302731	303267
fig|6666666.332384.peg.327	VFG045730(gi:289165092)(relA) GTP pyrophosphokinase [RelA (CVF365)]	744	10	0	61.98	306937	304703
fig|6666666.332384.peg.329	VFG015076(gi:70731797)(gacS) sensor protein GacS [GacS/GacA two-component system (CVF529)]	918	10	3.51e-174	55.09	308342	311098
fig|6666666.332384.peg.345	VFG006720(gi:116873066)(lap) aldehyde-alcohol dehydrogenase protein [Listeria adhesion protein (CVF228)]	382	10	6.65e-62	51.99	327475	326327
fig|6666666.332384.peg.349	NP_207965)(gluP) glucose/galactose transporter [LPS (VF0056)]	438	1	1.95e-62	53.3	328695	330011
fig|6666666.332384.peg.356	VFG044084(gi:15597579)(PA2383) transcriptional regulator [pyoverdine (IA001)]	305	1	3.88e-41	51.33	337012	336095
fig|6666666.332384.peg.375	VFG006807(gi:46908654)(lgt) prolipoprotein diacylglyceryl transferase [Lipoprotein diacylglyceryl transferase (CVF248)]	291	10	2.03e-20	54.86	361516	360641
fig|6666666.332384.peg.383	VFG030400(gi:333989012)(fadD13) fatty-acid--CoA ligase [MymA operon (CVF649)]	719	10	2.43e-26	43.74	371854	369695
fig|6666666.332384.peg.385	VFG045670(gi:383327725)(EFAU004_00405) LacI family transcriptional regulator [BopD (CVF615)]	342	4	3.2e-20	43.95	372447	373475
fig|6666666.332384.peg.386	NP_814691)(bopD) sugar-binding transcriptional regulator, LacI family [BopD (VF0362)]	340	4	4.02e-26	46.7	373486	374508
fig|6666666.332384.peg.387	VFG026414(gi:433649359)(lysA) diaminopimelate decarboxylase [Lysine synthesis (CVF310)]	420	10	3.35e-34	46.51	375780	374518
fig|6666666.332384.peg.389	VFG011805(gi:118475485)(CFF8240_1412) aspartate racemase [LOS (CVF396)]	235	1	9.82e-81	68.7	377512	376805
fig|6666666.332384.peg.390	VFG044370(gi:33521628)(qbsN) QbsN [thioquinolobactin (IA009)]	472	1	1.58e-17	46.08	379043	377625
fig|6666666.332384.peg.391	VFG038840(gi:507521851)(flmH) 3-oxoacyl-ACP reductase [Polar flagella (VF0473)]	253	10	1.72e-39	48.4	380158	379397
fig|6666666.332384.peg.400	VFG003626(gi:16761643)(sprB) possible AraC-family transcriptional regulator [TTSS (SPI-1 encode) (CVF031)]	252	6	1.46e-17	47.72	387817	387059
fig|6666666.332384.peg.401	VFG033611(gi:260858253)(glrA) positive regulator GrlA [LEE locus encoded TTSS (CVF431)]	168	5	1.99e-22	54.47	388310	387804
fig|6666666.332384.peg.402	VFG042609(gi:16766328)(stdD) outer membrane protein [Std (AI061)]	352	1	1.25e-24	46.27	389478	388420
fig|6666666.332384.peg.403	VFG004283(gi:56414975)(stdC) probable fimbrial chaperone protein [Std (CVF022)]	239	10	5.19e-178	84.7	390215	389496
fig|6666666.332384.peg.404	VFG021493(gi:198244928)(stdB) fimbrial usher protein [Std (CVF022)]	829	10	0	99.63	392769	390280
fig|6666666.332384.peg.405	VFG021499(gi:224584820)(stdA) putative fimbrial-like protein [Std (CVF022)]	194	10	9.39e-141	94.06	393473	392889
fig|6666666.332384.peg.407	NP_490501)(rck) resistance to complement killing [Rck (VF0108)]	178	10	2.24e-23	47.78	395406	394870
fig|6666666.332384.peg.418	VFG042620(gi:197284170)(mrpI) fimbriae recombinase [Proteus-like (MR/P) fimbriae, mannose resistant (biofilm formation) (AI072)]	298	1	3.67e-14	49.03	405419	404523
fig|6666666.332384.peg.424	VFG038906(gi:145297880)(ASA_0824) membrane protein [Hemolysin III (CVF793)]	219	10	2.38e-81	73.24	408771	408112
fig|6666666.332384.peg.449	VFG043556(gi:12045157)(MG_301) glyceraldehyde-3-phosphate dehydrogenase [GAPDH (AI368)]	348	10	5.1e-75	55.82	433017	431971
fig|6666666.332384.peg.453	VFG036559(gi:313668880)(fbpC) iron-uptake permease ATP-binding protein [ABC transporter (CVF197)]	225	10	1.52e-14	49.77	435116	435793
fig|6666666.332384.peg.454	VFG013572(gi:148825627)(hitC) iron(III) ABC transporter ATP-binding protein [Haemophilus iron transport locus (CVF501)]	218	10	4.41e-22	49.71	435787	436443
fig|6666666.332384.peg.461	VFG030301(gi:183980161)(adhD) zinc-containing alcohol dehydrogenase NAD- dependent, AdhD [MymA operon (CVF649)]	338	10	4.43e-18	41.42	444457	443441
fig|6666666.332384.peg.474	YP_096929)(lpg2936) Dot/Icm type IV secretion system effector [Dot/Icm (VF0156)]	259	1	5.79e-74	63.22	456208	456987
fig|6666666.332384.peg.479	VFG042879(gi:27364897)(pilT) Twitching motility protein PilT [type IV pili (AI113)]	326	10	1.33e-107	63.4	460994	460014
fig|6666666.332384.peg.483	VFG013266(gi:68248866)(orfM) putative deoxyribonucleotide triphosphate pyrophosphatase [LOS (CVF494)]	197	7	1.62e-79	73.3	462596	463189
fig|6666666.332384.peg.484	VFG013626(gi:68249065)(hemN) coproporphyrinogen III oxidase [Heme biosynthesis (CVF506)]	378	10	0	60.37	463182	464318
fig|6666666.332384.peg.501	VFG044282(gi:197284140)(pbtl) citrate lyase beta chain [Proteobactin (IA034)]	280	1	9.38e-28	50.37	479637	478795
fig|6666666.332384.peg.503	AAG10151)(aslA) putative arylsulfatase [AslA (VF0238)]	579	1	9.73e-15	54.26	482394	480655
fig|6666666.332384.peg.513	VFG041219(gi:283787016)(ctsD) T6SS protein Cts2D [CTS2 (SS187)]	69	1	6.05e-21	72.46	490870	490661
fig|6666666.332384.peg.514	VFG041218(gi:283787015)(cts2H) Hcp family T6SS protein Cts2H [CTS2 (SS187)]	161	10	6.07e-91	60.16	491526	491041
fig|6666666.332384.peg.522	NP_207394)(cheV3) chemotaxis coupling protein CheV3 [Pse5Ac7Ac (AI150)]	352	10	1.1e-29	55.51	501753	500695
fig|6666666.332384.peg.534	VFG026772(gi:433641310)(narH) Nitrate reductase 2 (NRZ), beta subunit [Nitrate reductase (CVF318)]	328	10	2.25e-14	45.36	512717	511731
fig|6666666.332384.peg.538	YP_001006778)(cheD) methyl-accepting chemotaxis protein CheD [peritrichous flagella (AI145)]	547	10	1.11e-109	62.37	516043	514400
fig|6666666.332384.peg.543	VFG038840(gi:507521851)(flmH) 3-oxoacyl-ACP reductase [Polar flagella (VF0473)]	294	10	1.61e-24	48.9	518485	519369
fig|6666666.332384.peg.544	VFG018806(gi:161870575)(exbD) biopolymer transport protein [Ton system (CVF202)]	141	5	1.22e-22	55.65	519908	519483
fig|6666666.332384.peg.545	VFG006288(gi:15794866)(exbB) biopolymer transport protein [Ton system (CVF202)]	244	5	5.8e-26	52.17	520649	519915
fig|6666666.332384.peg.551	VFG006720(gi:116873066)(lap) aldehyde-alcohol dehydrogenase protein [Listeria adhesion protein (CVF228)]	387	9	4.43e-12	40.93	524043	525206
fig|6666666.332384.peg.565	VFG041842(gi:34498090)(armR) two-component response regulator [Cpi-1a + Cpi-1 (SPI-1 like) (SS016)]	219	10	3.23e-56	62.31	540710	541369
fig|6666666.332384.peg.566	VFG041841(gi:34498089)(armS) two-component sensor kinase [Cpi-1a + Cpi-1 (SPI-1 like) (SS016)]	449	10	4.4e-27	48.12	541366	542715
fig|6666666.332384.peg.575	VFG044140(gi:218927856)(hasF) outer membrane channel protein [HasA-type hemophore-mediated heme uptake system (IA044)]	489	3	0	59.62	548485	549954
fig|6666666.332384.peg.589	VFG013435(gi:113460721)(rfaE) ADP-heptose synthase [LOS (CVF494)]	477	10	0	73.89	563894	562461
fig|6666666.332384.peg.600	VFG026980(gi:386005579)(sigA/rpoV) RNA polymerase sigma factor [Sigma A (CVF325)]	615	10	3.36e-101	79.06	576302	578149
fig|6666666.332384.peg.604	VFG043092(gi:15802298)(tar/cheM) methyl-accepting chemotaxis protein II [peritrichous flagella (AI140)]	521	10	3.76e-77	68.8	582267	580702
fig|6666666.332384.peg.605	YP_001006778)(cheD) methyl-accepting chemotaxis protein CheD [peritrichous flagella (AI145)]	506	10	1.39e-62	64.03	584175	582655
fig|6666666.332384.peg.607	VFG044396(gi:6959520)(pdtorfM) putative aminotransferase [Pyridine-2,6-dithiocarboxylic acid (PDTC) (IA030)]	459	10	4.77e-80	52.52	584605	585984
fig|6666666.332384.peg.637	VFG044353(gi:307130376)(acsB) 2,4-dihydroxyhept-2-ene-1,7-dioic acid aldolase [achromobactin (IA011)]	256	5	4.61e-33	49.72	617445	616675
fig|6666666.332384.peg.651	VFG030290(gi:118472939)(adhD) S-(hydroxymethyl)glutathione dehydrogenase/class III alcohol dehydrogenase [MymA operon (CVF649)]	347	10	1.03e-21	43.32	629621	630664
fig|6666666.332384.peg.656	VFG011801(gi:118475208)(gmhA) phosphoheptose isomerase [LOS (CVF396)]	196	10	6.09e-46	63.09	635051	635641
fig|6666666.332384.peg.671	VFG043545(gi:218560235)(ECS88_3547) lipoprotein NlpI [NlpI (AI331)]	294	1	0	98.3	648444	647560
fig|6666666.332384.peg.676	VFG016492(gi:15828876)(tuf) elongation factor Tu [EF-Tu (CVF587)]	892	10	5.59e-15	46.64	655595	652917
fig|6666666.332384.peg.678	VFG039487(gi:212212196)(CbuG_0575) hypothetical protein [T4SS effectors (CVF803)]	140	4	6.66e-44	69.89	657572	657150
fig|6666666.332384.peg.681	VFG013517(gi:113460873)(mrsA/glmM) phosphoglucosamine mutase [Exopolysaccharide (CVF495)]	445	10	0	69.71	661755	660418
fig|6666666.332384.peg.684	VFG031170(gi:433631232)(mpa) Mycobacterial proteasome ATPase Mpa [Proteasome-associated proteins (CVF656)]	644	10	1.19e-32	54.71	664635	662701
fig|6666666.332384.peg.699	VFG010106(gi:120401938)(mce3B) virulence factor Mce family protein [Mce3 (CVF338)]	183	2	4.09e-11	50.83	676162	675611
fig|6666666.332384.peg.701	VFG006259(gi:59800668)(fbpC) ABC transporter, ATP-binding protein, iron related [ABC transporter (CVF197)]	270	10	1.01e-31	52.34	677769	676957
fig|6666666.332384.peg.703	VFG011729(gi:121612774)(kpsF) arabinose-5-phosphate isomerase [Capsule biosynthesis and transport (CVF393)]	328	10	1.58e-92	62.27	678973	679959
fig|6666666.332384.peg.707	VFG044110(gi:33591572)(bhuV) hemin importer ATP-binding subunit [direct heme uptake system (IA046)]	241	10	6.42e-33	53.94	681648	682373
fig|6666666.332384.peg.708	VFG042736(gi:15599658)(rpoN) RNA polymerase factor sigma-54 [type IV pili (AI097)]	477	3	0	65.34	682421	683854
fig|6666666.332384.peg.716	VFG011124(gi:115422956)(bvgS) virulence sensor protein [Two-component system (CVF377)]	778	10	9.97e-69	49.75	690839	688503
fig|6666666.332384.peg.726	VFG044370(gi:33521628)(qbsN) QbsN [thioquinolobactin (IA009)]	496	1	6.98e-14	46.34	706015	704525
fig|6666666.332384.peg.736	VFG014962(gi:146281611)(mucD) serine protease MucD precursor [Alginate regulation (CVF523)]	423	10	1.01e-80	60.75	712622	713893
fig|6666666.332384.peg.737	VFG015773(gi:170720094)(algW) 2-alkenal reductase [Alginate regulation (CVF523)]	356	10	7.02e-84	59.38	713986	715056
fig|6666666.332384.peg.759	VFG037711(gi:469822479)(adeF) RND efflux transporter [AdeFGH efflux pump/transport autoinducer (CVF773)]	310	10	1.04e-13	47.43	731480	730548
fig|6666666.332384.peg.761	NP_250948)(ptxR) transcriptional regulator PtxR [pyoverdine (IA001)]	303	1	2.74e-28	50.35	731891	732802
fig|6666666.332384.peg.769	VFG006924(gi:37681136)(mshH) MSHA biogenesis protein MshH [Mannose-sensitive hemagglutinin (MSHA type IV pilus) (CVF259)]	646	6	9.45e-111	54.02	745382	743442
fig|6666666.332384.peg.782	VFG043139(gi:28901366)(scrC) sensory box/GGDEF family protein SrcC [lateral flagella (AI142)]	699	3	4.36e-93	54.84	756507	758606
fig|6666666.332384.peg.785	VFG036980(gi:385323677)(mtrC) membrane fusion protein MtrC [MtrCDE (CVF759)]	385	10	3.13e-99	64.91	759685	760842
fig|6666666.332384.peg.786	VFG036998(gi:385323678)(mtrD) drug efflux transport protein MtrD [MtrCDE (CVF759)]	1037	10	0	67.65	760854	763967
fig|6666666.332384.peg.790	NP_539653)(ricA) Rab2 interacting conserved protein A [RicA (VF0414)]	184	1	5.8e-33	58.97	765648	766202
fig|6666666.332384.peg.798	VFG021856(gi:118470693)(fxbA) Formyl transferase [exochelin (IA032)]	315	7	1.31e-33	47.86	770627	771574
fig|6666666.332384.peg.832	VFG040971(gi:206576910)(pulO) pullulanase secretion protein PulO [pul (SS215)]	155	10	2.69e-29	62.45	790077	790544
fig|6666666.332384.peg.835	VFG016492(gi:15828876)(tuf) elongation factor Tu [EF-Tu (CVF587)]	45	10	1.75e-15	81.55	791606	791469
fig|6666666.332384.peg.836	VFG016491(gi:26553484)(tuf) elongation factor Tu [EF-Tu (CVF587)]	246	10	7.7e-117	82.49	792379	791639
fig|6666666.332384.peg.845	VFG045705(gi:289165397)(mip) macrophage infectivity potentiator [Mip (CVF349)]	272	4	2.62e-39	53.78	798996	798178
fig|6666666.332384.peg.851	YP_109399)(wzt2) ATP-binding ABC transporter capsular polysaccharide export protein [Capsule I (VF0436)]	635	10	1.82e-17	47.87	803141	805048
fig|6666666.332384.peg.858	VFG042734(gi:15595849)(vfr) cAMP-regulatory protein [type IV pili (AI097)]	210	1	3.04e-99	83.66	808954	809586
fig|6666666.332384.peg.860	VFG015897(gi:71734081)(argD) ornithine aminotransferase [Phytotoxin phaseolotoxin (CVF546)]	405	10	2.07e-49	48.24	812982	811765
fig|6666666.332384.peg.863	YP_034062)(bepA) Bartonella effector protein BepA [VirB/VirD4 type IV secretion system (VF0369)]	200	5	6.67e-21	44.27	814265	813663
fig|6666666.332384.peg.865	VFG019080(gi:182683690)(slrA) peptidyl-prolyl cis-trans isomerase, cyclophilin-type [Streptococcal lipoprotein rotamase A (CVF129)]	190	5	4.61e-24	50.57	815103	814531
fig|6666666.332384.peg.873	VFG035969(gi:110641590)(upaH) autotransporter/adhesin [UpaH, AIDA-I type (CVF741)]	1887	4	0	63.94	822542	828205
fig|6666666.332384.peg.881	VFG042099(gi:13475322)(mlr6361) hypothetical protein [T3SS (SS026)]	161	2	1.98e-21	56.73	835178	834693
fig|6666666.332384.peg.882	VFG013121(gi:148827632)(comE/pilQ) competence protein E [Type IV pili (CVF486)]	389	10	3.54e-88	59.66	836848	835679
fig|6666666.332384.peg.896	VFG038238(gi:523529861)(bfmS) Signal transduction histidine kinase [Two-component system (CVF778)]	447	10	4.38e-32	56.08	852070	850727
fig|6666666.332384.peg.897	VFG038216(gi:384130704)(bfmR) putative response regulator (activator) in two-component regulatory system (OmpR family) [Two-component system (CVF778)]	239	10	5.19e-53	59.92	852795	852076
fig|6666666.332384.peg.900	VFG045722(gi:289163733)(feoA) ferrous iron transporter A [Ferrous iron transport (CVF359)]	75	1	4.2e-12	73.08	856360	856587
fig|6666666.332384.peg.901	VFG045721(gi:289163734)(feoB) ferrous iron transport protein B [Ferrous iron transport (CVF359)]	772	5	0	63.14	856606	858924
fig|6666666.332384.peg.903	VFG017855(gi:153948767)(pilW) putative transposase [Type IV pili (CVF049)]	304	2	1.05e-137	75.86	859408	860322
fig|6666666.332384.peg.916	VFG014367(gi:146307851)(fleQ) sigma54 specific transcriptional regulator, Fis family [Flagella (CVF521)]	527	10	7.43e-45	54.52	877138	878721
fig|6666666.332384.peg.937	NP_814691)(bopD) sugar-binding transcriptional regulator, LacI family [BopD (VF0362)]	331	4	1.01e-19	42.78	905432	904437
fig|6666666.332384.peg.946	VFG016303(gi:16078902)(capD) gamma-glutamyltranspeptidase [Polyglutamic acid capsule (CVF566)]	580	5	1.4e-132	55.35	914712	912970
fig|6666666.332384.peg.949	VFG030692(gi:333989849)(sugC) sugar ABC transporter [Trehalose-recycling ABC transporter (CVF651)]	356	10	1.52e-119	62.39	917074	916004
fig|6666666.332384.peg.950	VFG030623(gi:145224435)(sugB) binding-protein-dependent transport systems inner membrane component [Trehalose-recycling ABC transporter (CVF651)]	281	10	9.88e-19	45.66	917922	917077
fig|6666666.332384.peg.951	VFG030565(gi:31793499)(sugA) sugar-transport integral membrane protein ABC transporter UspA [Trehalose-recycling ABC transporter (CVF651)]	295	10	7.2e-39	50.22	918806	917919
fig|6666666.332384.peg.952	VFG043535(gi:23500399)(BRA0655) glycerol-3-phosphate ABC transporter periplasmic glycerol-3-phosphate-binding protein [BRA0655 (AI310)]	438	3	2.1e-138	66.04	920227	918911
fig|6666666.332384.peg.955	VFG013727(gi:38233194)(ciuD) Putative iron transport system ATP-binding protein [ciu iron uptake and siderophore biosynthesis system (CVF515)]	237	10	6.35e-28	51.76	921917	921204
fig|6666666.332384.peg.956	VFG007914(gi:120404101)(ddrA) daunorubicin resistance ABC transporter ATPase subunit [PDIM (phthiocerol dimycocerosate) and PGL (phenolic glycolipid) biosynthesis and transport (CVF288)]	255	10	9.86e-33	52.55	922686	921919
fig|6666666.332384.peg.963	VFG043648(gi:15598818)(rpoS) RNA polymerase sigma factor RpoS [type IV pili (AI097)]	284	10	2.84e-29	51.41	929332	928478
fig|6666666.332384.peg.965	VFG030700(gi:507420313)(sugC) sugar ABC transporter ATP-binding protein SugC [Trehalose-recycling ABC transporter (CVF651)]	222	10	6.5e-34	53.14	931294	930626
fig|6666666.332384.peg.966	VFG007590(gi:37680650)(flhF) flagellar biosynthesis protein [Flagella (CVF281)]	491	10	1.62e-18	48.51	932772	931297
fig|6666666.332384.peg.972	VFG031407(gi:433630073)(ctpV) Putative metal cation transporter P-type ATPase CtpV [Copper exporter (CVF658)]	676	10	1.53e-102	56.08	935163	937193
fig|6666666.332384.peg.973	YP_001006778)(cheD) methyl-accepting chemotaxis protein CheD [peritrichous flagella (AI145)]	547	10	1.48e-172	74.37	937393	939036
fig|6666666.332384.peg.978	VFG044071(gi:15607346)(Rv0205) transmembrane protein [HasA-type hemophore-mediated heme uptake system (IA045)]	349	1	2.82e-15	47.54	942123	943172
fig|6666666.332384.peg.979	VFG043695(gi:112292720)(clbA) putative 4'-phosphopantetheinyl transferase [colibactin (TX033)]	192	1	5.46e-12	57.89	943224	943802
fig|6666666.332384.peg.982	VFG008680(gi:433650447)(ddrA) daunorubicin resistance ABC transporter ATP-binding subunit [PDIM (phthiocerol dimycocerosate) and PGL (phenolic glycolipid) biosynthesis and transport (CVF288)]	913	10	2.96e-37	54.52	948261	945520
fig|6666666.332384.peg.989	VFG010904(gi:54293730)(iraB) di/tripeptide transporter homolog IraB [Iron acquisition/assimilation locus (CVF361)]	473	3	1.28e-57	49.72	954208	955629
fig|6666666.332384.peg.1004	VFG021241(gi:205353119)(csgD) DNA-binding transcriptional regulator CsgD [Agf/Csg (CVF001)]	200	5	2.09e-11	48.47	972616	972014
fig|6666666.332384.peg.1006	NP_250948)(ptxR) transcriptional regulator PtxR [pyoverdine (IA001)]	300	1	6.16e-23	47.8	973244	974146
fig|6666666.332384.peg.1015	YP_107884)(cdpA) cyclic di-GMP phosphodiesterase [CdpA (VF0432)]	668	3	3.27e-51	50.7	986266	984260
fig|6666666.332384.peg.1029	VFG016532(gi:42561491)(oppF) oligopeptide ABC transporter, permease component [Capsule (CVF591)]	337	10	5.2e-34	57.62	1003889	1002876
fig|6666666.332384.peg.1030	VFG016532(gi:42561491)(oppF) oligopeptide ABC transporter, permease component [Capsule (CVF591)]	327	10	3.75e-30	51.77	1004869	1003886
fig|6666666.332384.peg.1037	VFG045668(gi:397699344)(EFD32_0765) bacterial regulatory protein, LacI family protein [BopD (CVF615)]	335	4	8.83e-15	43.71	1011788	1012795
fig|6666666.332384.peg.1038	VFG036821(gi:385340493)(lptA) putative sulfatase [Phosphoethanolamine modification (CVF757)]	563	10	1.6e-41	45.17	1014966	1013275
fig|6666666.332384.peg.1039	NP_462537)(lpfE) long polar fimbrial minor subunit LpfE, adhesin [Lpf (VF0105)]	175	6	9.58e-130	90.74	1015711	1015184
fig|6666666.332384.peg.1040	NP_462538)(lpfD) long polar fimbrial protein LpfD [Lpf (VF0105)]	359	10	0	78.08	1016796	1015717
fig|6666666.332384.peg.1041	NP_462539)(lpfC) long polar fimbrial usher protein LpfC [Lpf (VF0105)]	842	10	0	81.44	1019342	1016814
fig|6666666.332384.peg.1042	NP_462540)(lpfB) long polar fimbrial chaperone protein LpfB [Lpf (VF0105)]	232	10	3.9e-172	71.94	1020063	1019365
fig|6666666.332384.peg.1043	VFG021365(gi:198242363)(lpfA) long polar fimbria protein A [Lpf (CVF004)]	174	10	2.66e-123	79.84	1020672	1020148
fig|6666666.332384.peg.1045	VFG042313(gi:16763947)(STM0570) outer membrane esterase [ApeE (SS104)]	234	1	5.12e-19	55.33	1021894	1021190
fig|6666666.332384.peg.1049	VFG031446(gi:385993955)(ompA) outer membrane protein A ompA [Pore-forming protein (CVF659)]	220	10	4.41e-22	61.73	1025504	1026166
fig|6666666.332384.peg.1087	VFG016484(gi:12045310)(tuf) elongation factor Tu [EF-Tu (CVF587)]	616	10	3.66e-32	45.74	1063000	1061150
fig|6666666.332384.peg.1097	VFG035945(gi:91213116)(upaG/ehaG) autotransport adhesin [UpaG adhesin, trimeric AT (CVF740)]	1236	10	0	71.33	1071530	1075240
fig|6666666.332384.peg.1102	NP_814691)(bopD) sugar-binding transcriptional regulator, LacI family [BopD (VF0362)]	351	4	1.04e-18	44.08	1080815	1079760
fig|6666666.332384.peg.1106	VFG005975(gi:55821115)(eps4) exopolysaccharide biosynthesis protein [Capsule (CVF186)]	273	2	9.35e-17	55.95	1084567	1083746
fig|6666666.332384.peg.1114	VFG016374(gi:30023299)(BC5267) Glycosyltransferase [Polysaccharide capsule (CVF567)]	344	10	9.42e-33	51.67	1092016	1090982
fig|6666666.332384.peg.1115	VFG030293(gi:108801614)(adhD) alcohol dehydrogenase GroES-like protein [MymA operon (CVF649)]	341	10	6.43e-19	42.13	1093376	1092351
fig|6666666.332384.peg.1116	VFG026063(gi:206561564)(wcbT) putative acyl-CoA transferase [Capsule I (CVF645)]	398	9	1.15e-68	54.17	1094582	1093386
fig|6666666.332384.peg.1117	NP_439271)(rfaD) ADP-L-glycero-D-mannoheptose-6-epimerase [LOS (VF0044)]	310	10	0	72.5	1094785	1095717
fig|6666666.332384.peg.1118	NP_439262)(rfaF) ADP-heptose-LPS heptosyltransferase II [LOS (CVF494)]	348	10	4.54e-156	70.1	1095720	1096766
fig|6666666.332384.peg.1119	VFG013280(gi:113461747)(opsX/rfaC) lipopolysaccharide heptosyltransferase-1 [LOS (CVF494)]	317	10	2.72e-126	62.22	1096766	1097719
fig|6666666.332384.peg.1124	VFG013262(gi:148825462)(lgtC) UDP-galactose--lipooligosaccharide galactosyltransferase [LOS (CVF494)]	336	6	3.53e-19	48.04	1102965	1101955
fig|6666666.332384.peg.1125	VFG013262(gi:148825462)(lgtC) UDP-galactose--lipooligosaccharide galactosyltransferase [LOS (CVF494)]	337	6	2.69e-22	46.81	1103996	1102983
fig|6666666.332384.peg.1126	VFG005842(gi:55823023)(epsX) lipopolysaccharide 1,6-galactosyltransferase [Capsule (CVF186)]	359	7	1.31e-60	46.74	1105081	1104002
fig|6666666.332384.peg.1128	NP_253696)(waaP) UDP-glucose:(heptosyl) LPS alpha 1,3-glucosyltransferase WaaG [LPS (VF0085)]	265	1	3.27e-101	70.27	1106213	1105416
fig|6666666.332384.peg.1129	NP_253697)(waaG) B-band O-antigen polymerase [LPS (VF0085)]	354	1	7.04e-127	65.53	1107270	1106206
fig|6666666.332384.peg.1130	VFG011773(gi:118475094)(CFF8240_1403) putative heptosyltransferase III waaq [LOS (CVF396)]	338	2	1.85e-32	44.94	1108343	1107327
fig|6666666.332384.peg.1131	VFG013312(gi:148827830)(kdtA) 3-deoxy-D-manno-octulosonic-acid transferase [LOS (CVF494)]	403	10	1.15e-148	66.44	1108872	1110083
fig|6666666.332384.peg.1132	NP_208266)(kdtB) lipopolysaccharide core biosynthesis protein [LPS (VF0056)]	159	1	1.97e-51	73.51	1110092	1110571
fig|6666666.332384.peg.1163	VFG043491(gi:24216818)(ligA) NAD dependent DNA ligase [Fibronectin-binding protein (AI240)]	561	1	3.86e-19	42.14	1133624	1131939
fig|6666666.332384.peg.1166	VFG009931(gi:126434905)(relA) (p)ppGpp synthetase I, SpoT/RelA [(p)ppGpp synthesis and hydrolysis (CVF335)]	703	10	2.02e-175	57.53	1134853	1136964
fig|6666666.332384.peg.1178	VFG034394(gi:386612489)(ecpR) fimbrillin protein MatA [E. coli common pilus (ECP) (CVF625)]	205	10	9.69e-14	50.19	1153188	1153805
fig|6666666.332384.peg.1179	VFG021095(gi:197247791)(misL) outer membrane autotransporter barrel domain [MisL (CVF008)]	955	10	0	96.5	1153880	1156747
fig|6666666.332384.peg.1184	VFG021058(gi:194444476)(mgtB) magnesium-translocating P-type ATPase [Mg2+ transport (CVF005)]	908	10	0	99.77	1163259	1160533
fig|6666666.332384.peg.1186	VFG004047(gi:62182255)(mgtC) Mg2+ transport protein [Mg2+ transport (CVF005)]	225	10	1.77e-165	90.89	1164156	1163479
fig|6666666.332384.peg.1188	YP_001007658)(pilW) type IV fimbrial biogenesis protein PilW [Type IV pili (CVF049)]	309	2	2.79e-126	72.35	1166557	1165628
fig|6666666.332384.peg.1195	VFG041021(gi:15596860)(sfa2) transcriptional regulator [HSI-2 (SS179)]	932	10	1.47e-22	48.03	1174326	1171528
fig|6666666.332384.peg.1203	VFG032174(gi:289434103)(hpt) hexose phosphate transport protein [Sugar-uptake system (CVF237)]	463	10	6.64e-131	62.69	1180908	1179517
fig|6666666.332384.peg.1204	VFG032174(gi:289434103)(hpt) hexose phosphate transport protein [Sugar-uptake system (CVF237)]	442	10	3.93e-43	45.69	1182379	1181051
fig|6666666.332384.peg.1205	VFG041502(gi:292487025)(hrpX) sensor kinase HrpX [T3SS (SS004)]	500	2	3.37e-19	50.93	1183891	1182389
fig|6666666.332384.peg.1206	VFG010911(gi:54298635)(letA) Legionella transmission activator LetA [LetA/LetS two component (CVF363)]	196	10	1e-34	54.18	1184481	1183891
fig|6666666.332384.peg.1208	NP_207965)(gluP) glucose/galactose transporter [LPS (VF0056)]	438	1	6.34e-43	49.51	1186897	1185581
fig|6666666.332384.peg.1214	VFG044123(gi:33593445)(alcS) putative drug resistance translocase [alcaligin (IA010)]	386	3	4.11e-30	45.58	1193050	1194210
fig|6666666.332384.peg.1215	NP_250948)(ptxR) transcriptional regulator PtxR [pyoverdine (IA001)]	307	1	1.58e-12	49.71	1196209	1195286
fig|6666666.332384.peg.1224	VFG045327(gi:52842404)(ibpA) global stress protein GspA [GspA (VF0167)]	142	1	2.12e-28	65.19	1203142	1202714
fig|6666666.332384.peg.1225	VFG045327(gi:52842404)(ibpA) global stress protein GspA [GspA (VF0167)]	137	1	1.71e-30	59.85	1203665	1203252
fig|6666666.332384.peg.1231	VFG045720(gi:289165297)(ccmF) cytochrome C-type biogenesis protein CcmF [Cytochrome c muturation (ccm) locus (CVF358)]	643	4	0	66.87	1209202	1207271
fig|6666666.332384.peg.1232	VFG045719(gi:289165298)(ccmE) cytochrome c-type biogenesis protein CcmE [Cytochrome c muturation (ccm) locus (CVF358)]	159	4	3.08e-38	63.45	1209678	1209199
fig|6666666.332384.peg.1234	VFG045717(gi:289165300)(ccmC) heme exporter protein CcmC [Cytochrome c muturation (ccm) locus (CVF358)]	248	5	3.17e-76	66.5	1210630	1209884
fig|6666666.332384.peg.1235	YP_094892)(ccmB) ABC transporter involved in cytochrome c biogenesis, CcmB subunit [Cytochrome c muturation (ccm) locus (CVF358)]	218	2	2.07e-30	64.64	1211329	1210673
fig|6666666.332384.peg.1236	VFG045715(gi:289165302)(ccmA) heme exporter protein CcmA [Cytochrome c muturation (ccm) locus (CVF358)]	176	10	2.56e-40	53.97	1211859	1211329
fig|6666666.332384.peg.1241	VFG031738(gi:169631126)(regX3) Sensory transduction protein RegX3 [RegX3 (CVF667)]	242	10	7.14e-39	54.08	1218007	1218735
fig|6666666.332384.peg.1244	VFG015067(gi:15596125)(gacS) sensor/response regulator hybrid [GacS/GacA two-component system (CVF529)]	895	10	1.54e-51	52.36	1219876	1222563
fig|6666666.332384.peg.1262	YP_095353)(lbtC) LbtC inner membrane protein required for import of Legiobactin [Legiobactin (VF0291)]	395	2	1.15e-13	45.39	1243137	1244324
fig|6666666.332384.peg.1269	VFG021792(gi:300858408)(ciuD) iron ABC transporter ATP-binding protein [ciu iron uptake and siderophore biosynthesis system (CVF515)]	269	10	4.74e-30	52.86	1250609	1249800
fig|6666666.332384.peg.1281	VFG006675(gi:32266064)(fliI) flagellum-specific ATP synthase [Flagella (CVF223)]	460	10	8.93e-47	50.53	1264682	1263300
fig|6666666.332384.peg.1283	VFG041940(gi:21230693)(hrcN) type III secretion system ATPase [T3SS (SS009)]	513	10	7.28e-44	47.81	1267164	1265623
fig|6666666.332384.peg.1300	VFG007914(gi:120404101)(ddrA) daunorubicin resistance ABC transporter ATPase subunit [PDIM (phthiocerol dimycocerosate) and PGL (phenolic glycolipid) biosynthesis and transport (CVF288)]	516	10	1.06e-25	54.44	1281250	1282800
fig|6666666.332384.peg.1304	NP_814691)(bopD) sugar-binding transcriptional regulator, LacI family [BopD (VF0362)]	329	4	4.66e-26	46.79	1285761	1286750
fig|6666666.332384.peg.1305	VFG036960(gi:194099566)(farB) efflux pump protein FarB [FarAB (CVF758)]	475	10	8.75e-40	46	1288143	1286716
fig|6666666.332384.peg.1325	VFG020864(gi:194450969)(ssaN) type III secretion system ATPase [TTSS (SPI-2 encode) (CVF032)]	419	10	2.99e-18	47.83	1309470	1310729
fig|6666666.332384.peg.1326	VFG013509(gi:68250318)(wecA) undecaprenyl-phosphate alpha-N-acetylglucosaminyl 1-phosphate transferase [LOS (CVF494)]	367	10	3.56e-136	59.43	1310959	1312062
fig|6666666.332384.peg.1327	VFG023778(gi:332159797)(YE105_C0173) lipopolysaccharide biosynthesis protein WzzE [O-antigen (CVF043)]	348	5	2.11e-179	50.85	1312074	1313120
fig|6666666.332384.peg.1328	VFG007639(gi:27364229)(wbjD/wecB) UDP-N-acetylglucosamine 2-epimerase [Capsular polysaccharide (CVF282)]	361	10	0	72.99	1313221	1314306
fig|6666666.332384.peg.1329	VFG007635(gi:27364228)(wecC) UDP-N-acetyl-D-mannosaminuronate dehydrogenase [Capsular polysaccharide (CVF282)]	435	10	0	69.39	1314258	1315565
fig|6666666.332384.peg.1330	VFG007659(gi:59710773)(rmlB) dTDP-glucose 4,6-dehydratase [Capsular polysaccharide (CVF282)]	355	10	0	81.28	1315565	1316632
fig|6666666.332384.peg.1331	VFG029495(gi:118616389)(rmlA) alpha-D-glucose-1-phosphate thymidylyl- transferase, RmlA [GPL locus (CVF650)]	74	10	1.72e-13	68.68	1316665	1316889
fig|6666666.332384.peg.1333	VFG011156(gi:33594869)(bplF) lipopolysaccharide biosynthesis protein [LPS (CVF380)]	376	10	4.34e-49	48.82	1317549	1318679
fig|6666666.332384.peg.1334	VFG038013(gi:407930975)(M3Q_291) AraC-type DNA-binding domain-containing protein [Capsule (CVF775)]	416	1	5.35e-58	52.74	1318681	1319931
fig|6666666.332384.peg.1337	VFG007687(gi:147675424)(cpsF) UDP-N-acetyl-D-mannosamine transferase [Capsular polysaccharide (CVF282)]	246	3	1.68e-35	57.44	1322359	1323099
fig|6666666.332384.peg.1339	VFG013642(gi:113460196)(hemY) porphyrin biosynthesis protein [Heme biosynthesis (CVF506)]	399	7	4.28e-92	62.61	1327007	1325808
fig|6666666.332384.peg.1340	VFG013632(gi:68249302)(hemX) putative uroporphyrin-III C-methyltransferase [Heme biosynthesis (CVF506)]	389	7	3.06e-60	59.34	1328176	1327007
fig|6666666.332384.peg.1341	VFG013199(gi:170718230)(hemD) Uroporphyrinogen III synthase HEM4 [Heme biosynthesis (CVF506)]	246	3	4.57e-61	53.24	1328938	1328198
fig|6666666.332384.peg.1342	VFG013198(gi:170718229)(hemC) porphobilinogen deaminase [Heme biosynthesis (CVF506)]	286	1	3.29e-123	74.05	1329795	1328935
fig|6666666.332384.peg.1351	VFG042630(gi:15042706)(mrfI) MrfI [mannose-resistant fimbriae, mrf (AI073)]	300	10	3.96e-16	47.3	1336118	1337020
fig|6666666.332384.peg.1382	VFG002705(gi:16123281)(ddhD) CDP-6-deoxy-delta-3,4-glucoseen reductase [O-antigen (CVF043)]	233	2	3.26e-34	54.98	1367460	1368161
fig|6666666.332384.peg.1385	VFG043691(gi:112292716)(clbD) putative 3-hydroxyacyl-CoA dehydrogenase [colibactin (TX033)]	729	2	1.39e-35	50.23	1373785	1371596
fig|6666666.332384.peg.1389	VFG013201(gi:170718589)(hemG) Protoporphyrinogen oxidase [Heme biosynthesis (CVF506)]	181	2	2.65e-58	69.01	1377422	1377967
fig|6666666.332384.peg.1401	VFG013205(gi:170718942)(hemN) oxygen-independent coproporphyrinogen III oxidase [Heme biosynthesis (CVF506)]	457	10	0	51.94	1387905	1389278
fig|6666666.332384.peg.1402	VFG019760(gi:229588672)(pilR) putative two-component system, response regulator [Type IV pili biosynthesis (CVF518)]	469	10	4.25e-113	58.5	1391000	1389591
fig|6666666.332384.peg.1403	VFG014000(gi:77461060)(pilS) Signal transduction histidine kinase, nitrogen specific, NtrB [Type IV pili biosynthesis (CVF518)]	349	10	1.38e-16	46.12	1392058	1391009
fig|6666666.332384.peg.1404	VFG009407(gi:145223515)(glnA1) glutamine synthetase, type I [Glutamine synthesis (CVF311)]	469	10	1.74e-172	68.15	1393742	1392333
fig|6666666.332384.peg.1405	VFG016490(gi:42560712)(tuf) translation elongation factor Tu [EF-Tu (CVF587)]	607	10	1.7e-24	47.91	1394118	1395941
fig|6666666.332384.peg.1423	VFG016039(gi:152983967)(pvdJ) thermophilic carboxylesterase Est2 [Pyoverdine (CVF551)]	297	10	3.04e-37	44.75	1411719	1410826
fig|6666666.332384.peg.1429	VFG009608(gi:118468429)(narH) nitrate reductase, beta subunit [Nitrate reductase (CVF318)]	300	10	3.56e-12	53.75	1415046	1414144
fig|6666666.332384.peg.1442	VFG006720(gi:116873066)(lap) aldehyde-alcohol dehydrogenase protein [Listeria adhesion protein (CVF228)]	382	10	2.31e-54	52.65	1425413	1424265
fig|6666666.332384.peg.1446	NP_798078)(exsA) transcriptional regulator ExsA [T3SS1 (VF0408)]	278	1	3.11e-12	52.24	1429523	1430359
fig|6666666.332384.peg.1456	YP_096960)(sodB) superoxide dismutase [SodB (VF0169)]	206	10	2.06e-53	54.55	1436998	1437618
fig|6666666.332384.peg.1459	VFG038245(gi:407931632)(bfmS) signal transduction histidine kinase [Two-component system (CVF778)]	457	10	5.29e-37	53.53	1440208	1438835
fig|6666666.332384.peg.1460	VFG038216(gi:384130704)(bfmR) putative response regulator (activator) in two-component regulatory system (OmpR family) [Two-component system (CVF778)]	232	10	1.26e-48	56.54	1440903	1440205
fig|6666666.332384.peg.1475	VFG013192(gi:170717476)(hitC) ABC transporter related [Haemophilus iron transport locus (CVF501)]	511	10	2.94e-23	50.89	1453966	1455501
fig|6666666.332384.peg.1496	NP_814691)(bopD) sugar-binding transcriptional regulator, LacI family [BopD (VF0362)]	341	4	1.05e-30	46.36	1473691	1472666
fig|6666666.332384.peg.1508	NP_644838)(adsA) Adenosine synthase A [AdsA (VF0422)]	518	1	4.14e-45	44.77	1487262	1488818
fig|6666666.332384.peg.1510	VFG009667(gi:120404186)(katG) catalase/peroxidase HPI [Catalase-peroxidase (CVF321)]	726	10	0	72.49	1490068	1492248
fig|6666666.332384.peg.1521	VFG034712(gi:387609756)(ibeC) hypothetical protein [Invasion of brain endothelial cells (Ibes) (CVF429)]	577	10	0	95.13	1505527	1503794
fig|6666666.332384.peg.1527	VFG006042(gi:76788234)(cpsY) transcriptional regulator CpsY [Capsule (CVF186)]	305	1	7.52e-14	47.12	1513565	1514482
fig|6666666.332384.peg.1532	VFG007263(gi:15640502)(irgA) iron-regulated outer membrane virulence protein, TonB receptor family [Enterobactin receptors (CVF277)]	614	10	4.3e-30	44.52	1518595	1520439
fig|6666666.332384.peg.1538	VFG016492(gi:15828876)(tuf) elongation factor Tu [EF-Tu (CVF587)]	166	10	6.44e-35	82.48	1525326	1525826
fig|6666666.332384.peg.1548	VFG035882(gi:387605711)(aec8) hypothetical protein [ACE T6SS (CVF736)]	144	3	3.52e-13	52.83	1539075	1538641
fig|6666666.332384.peg.1554	VFG044378(gi:28192388)(qbsC) QbsC [thioquinolobactin (IA009)]	252	2	1.09e-45	55.91	1542577	1541819
fig|6666666.332384.peg.1557	VFG019929(gi:229593296)(algQ) transcriptional regulatory protein [Alginate regulation (CVF523)]	162	10	1.21e-20	52.4	1545952	1545464
fig|6666666.332384.peg.1559	VFG013612(gi:113461676)(hemE) uroporphyrinogen decarboxylase [Heme biosynthesis (CVF506)]	354	2	0	87.01	1546859	1547923
fig|6666666.332384.peg.1562	VFG043551(gi:15827894)(ML1683) histone-like protein [histone-like protein (Hlp)/laminin-binding protein (LBP) (AI354)]	90	1	8.38e-15	60.67	1549423	1549695
fig|6666666.332384.peg.1565	VFG013995(gi:152984325)(pilS) two-component sensor PilS [Type IV pili biosynthesis (CVF518)]	465	10	3.98e-26	51.04	1551150	1552547
fig|6666666.332384.peg.1566	VFG019760(gi:229588672)(pilR) putative two-component system, response regulator [Type IV pili biosynthesis (CVF518)]	441	10	3.92e-121	62.68	1552553	1553878
fig|6666666.332384.peg.1572	YP_177728)(icl) Isocitrate lyase Icl (isocitrase) (isocitratase) [Isocitrate lyase (VF0253)]	434	10	0	75.34	1560904	1562208
fig|6666666.332384.peg.1589	VFG005975(gi:55821115)(eps4) exopolysaccharide biosynthesis protein [Capsule (CVF186)]	201	1	5.38e-17	61.62	1580345	1579740
fig|6666666.332384.peg.1592	VFG013531(gi:68249838)(pgi) glucose-6-phosphate isomerase [Exopolysaccharide (CVF495)]	549	10	0	80.24	1582779	1584428
fig|6666666.332384.peg.1595	VFG007644(gi:59710765)(wbfC) hypothetical protein [Capsular polysaccharide (CVF282)]	245	1	1.44e-17	52.99	1585813	1586550
fig|6666666.332384.peg.1596	VFG007643(gi:59710763)(wbfB) WbfB protein [Capsular polysaccharide (CVF282)]	698	1	1.91e-144	60.64	1586550	1588646
fig|6666666.332384.peg.1598	VFG030651(gi:443492306)(sugB) sugar-transport integral membrane protein ABC transporter SugB [Trehalose-recycling ABC transporter (CVF651)]	296	10	7.03e-31	50.83	1590255	1589365
fig|6666666.332384.peg.1599	VFG030565(gi:31793499)(sugA) sugar-transport integral membrane protein ABC transporter UspA [Trehalose-recycling ABC transporter (CVF651)]	514	10	3.72e-17	48.42	1591814	1590270
fig|6666666.332384.peg.1601	VFG030680(gi:126436569)(sugC) ABC transporter-like protein [Trehalose-recycling ABC transporter (CVF651)]	369	10	3.62e-110	66.11	1593497	1594606
fig|6666666.332384.peg.1616	VFG029831(gi:387874950)(pks) beta-ketoacyl synthase [GPL locus (CVF650)]	327	10	1.44e-23	51.15	1609143	1608160
fig|6666666.332384.peg.1633	VFG044090(gi:15598601)(hasE) metalloprotease secretion protein [HasA-type hemophore-mediated heme uptake system (IA041)]	416	5	4.55e-19	43.77	1623825	1625075
fig|6666666.332384.peg.1634	VFG000581(gi:16767511)(siiE) inner membrane protein [BapA (AI387)]	1410	6	0	51.6	1625092	1629324
fig|6666666.332384.peg.1635	VFG000581(gi:16767511)(siiE) inner membrane protein [BapA (AI387)]	4025	7	0	49.29	1629300	1641377
fig|6666666.332384.peg.1636	VFG033884(gi:386641996)(hlyB) hemolysin secretion protein HlyB [Alpha-hemolysin (CVF453)]	688	10	1.09e-43	47.98	1641417	1643483
fig|6666666.332384.peg.1638	VFG043139(gi:28901366)(scrC) sensory box/GGDEF family protein SrcC [lateral flagella (AI142)]	533	3	2.02e-45	54.73	1644605	1646206
fig|6666666.332384.peg.1639	VFG042570(gi:62255469)(ldaA) LdaA [locus for diffuse adherence (lda), afimbrial adhesin (AI044)]	107	3	2.96e-17	62.11	1646517	1646194
fig|6666666.332384.peg.1649	VFG030387(gi:433645508)(tgs4) acyl-CoA synthetase (AMP-forming)/AMP-acid ligase II [MymA operon (CVF649)]	652	10	3.86e-29	42.96	1657896	1655938
fig|6666666.332384.peg.1652	VFG022803(gi:333989790)(narH) NarH [Nitrate reductase (CVF318)]	223	10	3.56e-12	52.52	1660439	1661110
fig|6666666.332384.peg.1654	VFG045720(gi:289165297)(ccmF) cytochrome C-type biogenesis protein CcmF [Cytochrome c muturation (ccm) locus (CVF358)]	555	4	9.84e-100	60.35	1662132	1663799
fig|6666666.332384.peg.1659	VFG017486(gi:118462718)(nuoG) NADH-quinone oxidoreductase, chain g [NuoG (CVF620)]	559	1	8.87e-11	41.38	1669276	1667597
fig|6666666.332384.peg.1660	VFG027911(gi:397679342)(nuoG) NADH-quinone oxidoreductase subunit G [NuoG (CVF620)]	139	3	3.38e-12	48.51	1669744	1669325
fig|6666666.332384.peg.1666	VFG022914(gi:340625777)(phoR) putative two component system response sensor kinase membrane associated PHOR [PhoP/R (CVF331)]	359	10	3.82e-24	47.24	1675965	1674886
fig|6666666.332384.peg.1667	VFG041842(gi:34498090)(armR) two-component response regulator [Cpi-1a + Cpi-1 (SPI-1 like) (SS016)]	222	10	1.78e-52	58.8	1676634	1675966
fig|6666666.332384.peg.1668	VFG036818(gi:385323751)(lptA) putative sulfatase [Phosphoethanolamine modification (CVF757)]	547	7	1.06e-154	60.8	1678274	1676631
fig|6666666.332384.peg.1670	VFG000763(gi:6009400)(perA/bfpT) transcriptional regulator BfpT [Per (VF0190)]	253	10	1.85e-22	60.05	1680646	1679885
fig|6666666.332384.peg.1681	VFG024082(gi:387874592)(narH) narH [Nitrate reductase (CVF318)]	208	10	4.89e-20	53.98	1696579	1697205
fig|6666666.332384.peg.1686	VFG033717(gi:260845719)(ECO103_3640) T3SS component [LEE locus encoded TTSS (CVF431)]	301	5	1.6e-36	54.72	1700428	1701333
fig|6666666.332384.peg.1690	VFG003633(gi:56414819)(hilC) possible AraC-family transcriptional regulator [TTSS (SPI-1 encode) (CVF031)]	291	10	1e-52	56.92	1703578	1702703
fig|6666666.332384.peg.1708	VFG010484(gi:54296712)(htpB) 60 kDa chaperonin (Protein Cpn60)(groEL protein)(Heat shock protein B). [Hsp60 (CVF347)]	548	10	0	81.19	1717635	1719281
fig|6666666.332384.peg.1729	VFG043099(gi:15802355)(fliY) cystine transporter subunit [peritrichous flagella (AI140)]	239	3	3.67e-31	49.65	1738649	1737930
fig|6666666.332384.peg.1752	VFG029782(gi:183980533)(fadE5) acyl-CoA dehydrogenase FadE5 [GPL locus (CVF650)]	540	10	1.12e-18	43.75	1761922	1763544
fig|6666666.332384.peg.1776	VFG010531(gi:54296815)(mip) macrophage infectivity potentiator [Mip (CVF349)]	206	4	1.07e-48	56.72	1779859	1780479
fig|6666666.332384.peg.1784	NP_644838)(adsA) Adenosine synthase A [AdsA (VF0422)]	647	1	9.37e-11	43.56	1790259	1788316
fig|6666666.332384.peg.1789	VFG038900(gi:117619797)(hlyA) transporter [Hemolysin, HlyA (CVF792)]	447	8	0	59.74	1793775	1792432
fig|6666666.332384.peg.1790	VFG037105(gi:385337152)(msrA/B(pilB)) peptide methionine sulfoxide reductase MsrA/MsrB [includes: thioredoxin, peptide methionine sulfoxide reductase MsrA (protein-methionine-S-oxide reductase; peptide Met(O) reductase) and peptide methio [Methionine sulphoxide reductase (CVF762)]	212	8	3.75e-35	55.48	1794596	1793958
fig|6666666.332384.peg.1819	NP_814691)(bopD) sugar-binding transcriptional regulator, LacI family [BopD (VF0362)]	315	4	1.66e-22	47.15	1825129	1824182
fig|6666666.332384.peg.1821	VFG021056(gi:205354641)(mgtB) Magnesium transport ATPase, P-type 2 [Mg2+ transport (CVF005)]	902	10	0	71.09	1825513	1828221
fig|6666666.332384.peg.1829	VFG015903(gi:71735587)(argK) phaseolotoxin-insensitive ornithine carbamoyltransferase [Phytotoxin phaseolotoxin (CVF546)]	334	1	1.67e-97	62.84	1834095	1833091
fig|6666666.332384.peg.1835	VFG015903(gi:71735587)(argK) phaseolotoxin-insensitive ornithine carbamoyltransferase [Phytotoxin phaseolotoxin (CVF546)]	334	1	3.47e-95	62.95	1838576	1837572
fig|6666666.332384.peg.1847	VFG045670(gi:383327725)(EFAU004_00405) LacI family transcriptional regulator [BopD (CVF615)]	332	2	4.3e-11	40.71	1851576	1850578
fig|6666666.332384.peg.1849	VFG038840(gi:507521851)(flmH) 3-oxoacyl-ACP reductase [Polar flagella (VF0473)]	254	10	2.87e-49	47.12	1853785	1853021
fig|6666666.332384.peg.1852	VFG030300(gi:340628077)(adhD) putative Zinc-type alcohol dehydrogenase ADHD [MymA operon (CVF649)]	339	5	4.39e-12	40.33	1856635	1855616
fig|6666666.332384.peg.1857	VFG039532(gi:212212082)(CbuG_0446) hypothetical protein [T4SS effectors (CVF803)]	238	1	3.73e-45	56.84	1865868	1865152
fig|6666666.332384.peg.1870	VFG041218(gi:283787015)(cts2H) Hcp family T6SS protein Cts2H [CTS2 (SS187)]	148	4	5.61e-43	60.14	1876138	1876584
fig|6666666.332384.peg.1879	YP_095353)(lbtC) LbtC inner membrane protein required for import of Legiobactin [Legiobactin (VF0291)]	413	2	2.41e-14	46.6	1885779	1884538
fig|6666666.332384.peg.1881	VFG017855(gi:153948767)(pilW) putative transposase [Type IV pili (CVF049)]	321	2	1.1e-123	72.08	1886258	1887223
fig|6666666.332384.peg.1896	YP_001006778)(cheD) methyl-accepting chemotaxis protein CheD [peritrichous flagella (AI145)]	553	10	0	74.98	1903388	1905049
fig|6666666.332384.peg.1898	VFG041021(gi:15596860)(sfa2) transcriptional regulator [HSI-2 (SS179)]	921	10	3.06e-28	51.44	1905372	1908137
fig|6666666.332384.peg.1915	VFG043139(gi:28901366)(scrC) sensory box/GGDEF family protein SrcC [lateral flagella (AI142)]	308	1	7.45e-11	46.97	1923277	1922351
fig|6666666.332384.peg.1919	VFG039382(gi:212212739)(coxH2/rimL) ribosomal-protein-S18-alanine acetyltransferase [T4SS effectors (CVF803)]	98	2	1.53e-18	55.32	1925825	1926121
fig|6666666.332384.peg.1933	VFG019362(gi:217964969)(lplA1) lipoyltransferase and lipoate-protein ligase family protein [Lipoate protein ligase A1 (CVF238)]	338	10	2.61e-56	53.42	1941322	1940306
fig|6666666.332384.peg.1939	VFG037386(gi:184158903)(bauE) enterochelin ABC transporter ATPase [Acinetobactin (VF0467)]	555	10	4.46e-20	47.76	1947719	1946052
fig|6666666.332384.peg.1944	VFG042570(gi:62255469)(ldaA) LdaA [locus for diffuse adherence (lda), afimbrial adhesin (AI044)]	289	3	1.36e-22	45.26	1952428	1951559
fig|6666666.332384.peg.1946	VFG011626(gi:17988319)(bvrR) Transcriptional regulatory protein BvrR [BvrR-BvrS (VF0368)]	229	10	4.89e-47	59.3	1953126	1953815
fig|6666666.332384.peg.1948	VFG009817(gi:118616307)(phoR) two component system response phosphate sensor kinase, PhoR [PhoP/R (CVF331)]	327	10	5.56e-26	48.78	1954255	1955238
fig|6666666.332384.peg.1950	VFG021607(gi:194448428)(sthE) putative major fimbrial subunit [Sth (CVF026)]	361	9	0	99.45	1957788	1956703
fig|6666666.332384.peg.1951	VFG021613(gi:198243552)(sthD) putative fimbrial subunit [Sth (CVF026)]	185	7	9.91e-133	99.61	1958386	1957829
fig|6666666.332384.peg.1952	VFG021624(gi:194451437)(sthC) outer membrane usher protein SfmD [Sth (CVF026)]	809	10	0	99.95	1960833	1958404
fig|6666666.332384.peg.1953	VFG004360(gi:16767835)(sthB) putative fimbrial chaparone [Sth (AI062)]	219	10	1.5e-161	92.52	1961646	1960987
fig|6666666.332384.peg.1954	VFG021640(gi:207859716)(sthA) putative fimbrial protein [Sth (CVF026)]	181	10	4.93e-132	88.25	1962286	1961741
fig|6666666.332384.peg.1957	VFG041119(gi:53722516)(regB) two-component response regulator protein [TSS-5 (SS192)]	238	10	3.44e-42	56.57	1964978	1964262
fig|6666666.332384.peg.1970	VFG043573(gi:15605121)(CT396) molecular chaperone DnaK [MOMP (AI392)]	638	1	0	77.17	1977917	1979833
fig|6666666.332384.peg.1980	VFG004145(gi:16763411)(bcfA) fimbrial subunit [bovine colonization factor (Bcf) (AI058)]	180	10	1.19e-127	82.64	1990796	1991338
fig|6666666.332384.peg.1981	VFG021282(gi:224581862)(bcfB) fimbrial chaparone [Bcf (CVF002)]	228	10	2.57e-167	99.25	1991439	1992125
fig|6666666.332384.peg.1982	VFG021297(gi:194446095)(bcfC) outer membrane usher protein FimD [Bcf (CVF002)]	888	10	0	99.59	1992085	1994751
fig|6666666.332384.peg.1983	VFG004160(gi:16763414)(bcfD) fimbrial subunit [bovine colonization factor (Bcf) (AI058)]	335	10	0	98.78	1994752	1995759
fig|6666666.332384.peg.1984	VFG004169(gi:62178593)(bcfE) fimbrial subunit [Bcf (CVF002)]	171	10	6.05e-126	86.01	1995790	1996305
fig|6666666.332384.peg.1985	VFG004171(gi:16759019)(bcfF) fimbrial subunit [Bcf (CVF002)]	172	10	3.78e-124	76.02	1996321	1996839
fig|6666666.332384.peg.1986	VFG021328(gi:197251411)(bcfG) fimbrial chaperone [Bcf (CVF002)]	211	10	1.39e-156	98.67	1996901	1997536
fig|6666666.332384.peg.1987	VFG042608(gi:16763418)(bcfH) thiol-disulfide isomerase [bovine colonization factor (Bcf) (AI058)]	281	1	0	100	1997601	1998446
fig|6666666.332384.peg.1994	NP_644838)(adsA) Adenosine synthase A [AdsA (VF0422)]	520	1	3.83e-45	45.37	2005011	2003449
fig|6666666.332384.peg.1996	AAG10151)(aslA) putative arylsulfatase [AslA (VF0238)]	497	1	4.79e-23	45.1	2006475	2007968
fig|6666666.332384.peg.2008	VFG006812(gi:16801024)(lspA) signal peptidase II [Lipoprotein-specific signal peptidase II (CVF249)]	166	6	3.03e-17	57.51	2023033	2023533
fig|6666666.332384.peg.2014	VFG013992(gi:146306000)(pilR) two component, sigma54 specific, transcriptional regulator, Fis family [Type IV pili biosynthesis (CVF518)]	185	1	8.48e-11	51.22	2028136	2027579
fig|6666666.332384.peg.2021	VFG044282(gi:197284140)(pbtl) citrate lyase beta chain [Proteobactin (IA034)]	289	1	2.05e-25	45.51	2033426	2034295
fig|6666666.332384.peg.2031	NP_539653)(ricA) Rab2 interacting conserved protein A [RicA (VF0414)]	198	1	3.8e-29	56.44	2044855	2044259
fig|6666666.332384.peg.2033	VFG030387(gi:433645508)(tgs4) acyl-CoA synthetase (AMP-forming)/AMP-acid ligase II [MymA operon (CVF649)]	517	10	9.48e-69	48.37	2047357	2045804
fig|6666666.332384.peg.2035	VFG044398(gi:6959522)(pdtorfO) putative acyl-CoA dehydrogenase [Pyridine-2,6-dithiocarboxylic acid (PDTC) (IA030)]	380	9	2.89e-35	43.11	2049891	2048749
fig|6666666.332384.peg.2053	NP_208374)(pdxA) 4-hydroxythreonine-4-phosphate dehydrogenase [Pse5Ac7Ac (AI150)]	329	1	1.1e-40	49.53	2067858	2066869
fig|6666666.332384.peg.2054	VFG032908(gi:347549610)(prsA2) putative post-translocation molecular chaperone [Post-translocation chaperone (CVF670)]	428	1	3.59e-11	43.8	2069144	2067858
fig|6666666.332384.peg.2066	VFG042570(gi:62255469)(ldaA) LdaA [locus for diffuse adherence (lda), afimbrial adhesin (AI044)]	281	1	2.98e-11	57.45	2085028	2085873
fig|6666666.332384.peg.2068	VFG013573(gi:113460924)(hitC) iron(III) ABC transporter, ATP-binding protein [Haemophilus iron transport locus (CVF501)]	235	10	1.91e-38	56.17	2087505	2086798
fig|6666666.332384.peg.2075	VFG009376(gi:118470522)(leuD) 3-isopropylmalate dehydratase, small subunit [Leucine synthesis (CVF309)]	201	10	7.9e-60	62.18	2093051	2092446
fig|6666666.332384.peg.2091	VFG014146(gi:116051138)(orfN) putative group 4 glycosyl transferase [LPS O-antigen (P. aeruginosa) (CVF520)]	360	1	2.15e-12	46.45	2109772	2110854
fig|6666666.332384.peg.2100	VFG013415(gi:148828304)(lpxC) UDP-3-O-[3-hydroxymyristoyl] N-acetylglucosamine deacetylase [LOS (CVF494)]	305	10	0	82.19	2120392	2121309
fig|6666666.332384.peg.2102	VFG023546(gi:169629483)(secA2) preprotein translocase subunit SecA [Accessory secretion factor (CVF299)]	901	10	3.32e-139	50.83	2122147	2124852
fig|6666666.332384.peg.2105	NP_250948)(ptxR) transcriptional regulator PtxR [pyoverdine (IA001)]	307	1	8.35e-34	50.17	2126526	2127449
fig|6666666.332384.peg.2111	VFG046029(hofC) protein transport protein HofC [Hemorrhagic E.coli pilus (HCP) (CVF825)]	400	10	0	82.75	2131512	2130310
fig|6666666.332384.peg.2112	VFG045991(hofB) protein transport protein HofB [Hemorrhagic E.coli pilus (HCP) (CVF825)]	461	10	0	83.01	2132887	2131502
fig|6666666.332384.peg.2113	VFG045972(ppdD) Prepilin peptidase-dependent protein D [Hemorrhagic E.coli pilus (HCP) (CVF825)]	145	10	9.61e-97	93.5	2133334	2132897
fig|6666666.332384.peg.2137	NP_208374)(pdxA) 4-hydroxythreonine-4-phosphate dehydrogenase [Pse5Ac7Ac (AI150)]	327	1	9.87e-43	48	2157958	2158941
fig|6666666.332384.peg.2146	VFG007910(gi:118466584)(ddrA) daunorubicin resistance ATP-binding protein DrrA [PDIM (phthiocerol dimycocerosate) and PGL (phenolic glycolipid) biosynthesis and transport (CVF288)]	308	10	6.96e-52	53.35	2167728	2168654
fig|6666666.332384.peg.2148	VFG021648(gi:207855690)(stiH) putative fimbriae [Sti (CVF027)]	359	10	0	87.23	2170612	2169533
fig|6666666.332384.peg.2149	VFG021659(gi:194446310)(stiC) outer membrane usher protein FimD [Sti (CVF027)]	848	10	0	99.34	2173167	2170621
fig|6666666.332384.peg.2150	VFG004374(gi:16763566)(stiB) putative fimbrial chaparone [Sti (AI066)]	227	10	2.65e-171	95.99	2173877	2173194
fig|6666666.332384.peg.2151	VFG004376(gi:16763567)(stiA) putative fimbrial subunit [Sti (AI066)]	179	10	1.17e-128	91.56	2174464	2173925
fig|6666666.332384.peg.2154	VFG011777(gi:118475714)(CFF8240_1402) xylanase/chitin deacetylase [LOS (CVF396)]	407	8	4.66e-26	48.56	2175342	2176565
fig|6666666.332384.peg.2155	VFG008117(gi:443493157)(panD) aspartate 1-decarboxylase precursor PanD [Pantothenate synthesis (CVF305)]	126	10	2.65e-41	69.62	2176952	2176572
fig|6666666.332384.peg.2156	VFG009302(gi:145222016)(panC) pantoate--beta-alanine ligase [Pantothenate synthesis (CVF305)]	284	10	3.38e-69	58.55	2177901	2177047
fig|6666666.332384.peg.2167	VFG044365(gi:307131895)(fct) ferrichrysobactin receptor [chrysobactin (IA012)]	721	10	1.01e-164	46.39	2189358	2191523
fig|6666666.332384.peg.2168	VFG044173(gi:28901507)(pvuE) iron-dicitrate transporter ATP-binding subunit [vibrioferrin (IA038)]	265	10	1.8e-71	65.51	2191572	2192369
fig|6666666.332384.peg.2169	VFG044209(gi:47530065)(fpuA) iron compound ABC transporter iron compound-binding protein [petrobactin (IA028)]	296	2	2.76e-24	46.37	2192369	2193259
fig|6666666.332384.peg.2170	VFG044210(gi:47530066)(fpuB) iron-hydroxamate transporter permease subunit [petrobactin (IA028)]	685	10	4.22e-86	51.91	2193256	2195313
fig|6666666.332384.peg.2171	VFG013618(gi:113461372)(hemL) glutamate-1-semialdehyde aminotransferase [Heme biosynthesis (CVF506)]	426	10	0	55.21	2196678	2195398
fig|6666666.332384.peg.2176	VFG034292(gi:386621154)(chuT) Periplasmic hemin-binding protein [Hemin uptake (CVF460)]	262	10	1.21e-19	48.53	2200244	2199456
fig|6666666.332384.peg.2179	VFG014960(gi:77457592)(mucD) Peptidase S1C, Do [Alginate regulation (CVF523)]	442	10	1.12e-85	57.31	2202778	2204106
fig|6666666.332384.peg.2192	VFG045688(gi:383329042)(uppS) undecaprenyl diphosphate synthase [Capsule (CVF618)]	229	3	6.12e-69	62.44	2220801	2221490
fig|6666666.332384.peg.2193	NP_816140)(cpsB) phosphatidate cytidylyltransferase [Capsule (VF0361)]	285	3	7.09e-33	55.36	2221503	2222360
fig|6666666.332384.peg.2194	VFG015003(gi:28868747)(mucP) membrane-associated zinc metalloprotease, putative [Alginate regulation (CVF523)]	450	10	8.35e-141	63.98	2222372	2223724
fig|6666666.332384.peg.2196	VFG018687(gi:163868107)(omp89) outer membrane protein [Omp89 (CVF601)]	765	4	1.5e-78	45.35	2223891	2226188
fig|6666666.332384.peg.2198	VFG013379(gi:113461121)(lpxD) UDP-3-O-[3-hydroxymyristoyl] glucosamine N-acyltransferase [LOS (CVF494)]	341	10	5.41e-169	73.93	2226800	2227825
fig|6666666.332384.peg.2199	VFG011402(gi:23502030)(fabZ) (3R)-hydroxymyristoyl ACP dehydratase [LPS (CVF383)]	151	6	1.9e-41	63.4	2227931	2228386
fig|6666666.332384.peg.2200	VFG013394(gi:113461502)(lpxA) UDP-N-acetylglucosamine acyltransferase [LOS (CVF494)]	262	10	7.98e-136	75.28	2228390	2229178
fig|6666666.332384.peg.2201	VFG013386(gi:148826325)(lpxB) lipid-A-disaccharide synthase [LOS (CVF494)]	382	10	1.88e-177	72.78	2229178	2230326
fig|6666666.332384.peg.2217	NP_933683)(IlpA) immunogenic lipoprotein A [IlpA (VF0513)]	271	1	8.39e-127	79.7	2247727	2246912
fig|6666666.332384.peg.2219	VFG036559(gi:313668880)(fbpC) iron-uptake permease ATP-binding protein [ABC transporter (CVF197)]	343	10	8.67e-39	53.72	2249443	2248412
fig|6666666.332384.peg.2220	VFG011816(gi:118475458)(CFF8240_1415) D,D-heptose 1,7-bisphosphate phosphatase [LOS (CVF396)]	188	8	9.66e-47	60.9	2249633	2250199
fig|6666666.332384.peg.2223	NP_250948)(ptxR) transcriptional regulator PtxR [pyoverdine (IA001)]	304	2	9.9e-35	47.39	2252920	2252006
fig|6666666.332384.peg.2226	VFG029672(gi:433645197)(fmt) methylase involved in ubiquinone/menaquinone biosynthesis [GPL locus (CVF650)]	256	4	1.6e-12	54.59	2255210	2255980
fig|6666666.332384.peg.2227	VFG041913(gi:28868586)(hrpH) membrane-bound lytic murein transglycosylase D [T3SS (SS003)]	406	1	3.09e-71	65.44	2257256	2256036
fig|6666666.332384.peg.2260	VFG041095(gi:16763653)(sciF) cytoplasmic protein [SCI (Salmonella centrisome island) (SS176)]	133	1	3.68e-99	100	2280666	2280265
fig|6666666.332384.peg.2261	VFG041096(gi:16763654)(clpV) chaperone ATPase [SCI (Salmonella centrisome island) (SS176)]	813	10	0	70.93	2281024	2283465
fig|6666666.332384.peg.2273	VFG021382(gi:194734343)(safB) gram-negative pili assembly chaperone [Saf (CVF013)]	245	10	0	95.2	2290561	2291298
fig|6666666.332384.peg.2274	VFG021386(gi:198245015)(safC) outer-membrane fimbrial usher protein [Saf (CVF013)]	836	10	0	99.07	2291322	2293832
fig|6666666.332384.peg.2275	VFG021394(gi:198243988)(safD) putative fimbrial structural subunit [Saf (CVF013)]	156	10	2.69e-115	88.81	2293854	2294324
fig|6666666.332384.peg.2276	VFG011777(gi:118475714)(CFF8240_1402) xylanase/chitin deacetylase [LOS (CVF396)]	273	6	1.08e-46	46.63	2294732	2295553
fig|6666666.332384.peg.2282	VFG004390(gi:16759295)(tcfA) putative fimbrial protein [Tcf (AI068)]	236	10	3.57e-180	77.83	2299458	2300168
fig|6666666.332384.peg.2283	VFG004396(gi:56414570)(tcfB) putative fimbrial subunit [Tcf (CVF030)]	172	10	3.11e-122	73.46	2300276	2300794
fig|6666666.332384.peg.2284	VFG021714(gi:194738117)(tcfC) TcfC protein [Tcf (CVF030)]	895	10	0	80.43	2300903	2303590
fig|6666666.332384.peg.2285	VFG004404(gi:56414568)(tcfD) putative fimbrail protein [Tcf (CVF030)]	355	10	1.71e-178	63.26	2303613	2304680
fig|6666666.332384.peg.2289	VFG043567(gi:16763689)(pagN) adhesin/invasin protein PagN [Rck (AI382)]	239	9	1.37e-176	59.28	2307707	2306988
fig|6666666.332384.peg.2293	VFG013422(gi:33152324)(gmhA/lpcA) phosphoheptose isomerase [LOS (CVF494)]	192	10	1.32e-110	80.71	2312392	2312970
fig|6666666.332384.peg.2303	VFG043568(gi:16764916)(ompD) outer membrane porin precursor [Hek (AI384)]	350	1	2.75e-144	71.35	2323137	2322085
fig|6666666.332384.peg.2308	VFG012837(gi:82524546)(ipaH2.5) invasion plasmid antigen, fragment [Mxi-Spa TTSS effectors controlled by MxiE (CVF465)]	207	1	1.3e-26	52.12	2327036	2326413
fig|6666666.332384.peg.2311	VFG044370(gi:33521628)(qbsN) QbsN [thioquinolobactin (IA009)]	410	1	8.75e-12	51.25	2328413	2329645
fig|6666666.332384.peg.2313	VFG009377(gi:145224805)(leuD) 3-isopropylmalate dehydratase, small subunit [Leucine synthesis (CVF309)]	208	10	1.03e-35	51.46	2331200	2331826
fig|6666666.332384.peg.2319	VFG021429(gi:197249532)(stbE) fimbrial chaperone protein [Stb (CVF020)]	252	10	0	99.31	2336744	2335986
fig|6666666.332384.peg.2320	VFG021442(gi:194448957)(stbD) putative fimbrial usher [Stb (CVF020)]	441	10	0	99.18	2338035	2336710
fig|6666666.332384.peg.2321	VFG004249(gi:62178951)(stbC) putative fimbriae; usher [Stb (CVF020)]	853	10	0	99.68	2340601	2338040
fig|6666666.332384.peg.2322	VFG021460(gi:194448277)(stbB) fimbrial chaperone protein [Stb (CVF020)]	206	10	2.92e-151	99.37	2341205	2340585
fig|6666666.332384.peg.2323	VFG004255(gi:16763720)(stbA) putative fimbrial major subunit [Stb (AI059)]	178	10	8.89e-128	70.2	2341944	2341408
fig|6666666.332384.peg.2324	VFG025218(gi:83717154)(bprP) transcriptional regulator [Bsa T3SS (CVF641)]	244	4	1.33e-17	57.58	2342609	2343343
fig|6666666.332384.peg.2326	YP_107884)(cdpA) cyclic di-GMP phosphodiesterase [CdpA (VF0432)]	516	3	1.58e-41	53.65	2344140	2345690
fig|6666666.332384.peg.2327	VFG003537(gi:123443745)(YE3558) hypothetical protein [Ysa T3SS (SS018)]	128	1	2.54e-14	58.59	2345790	2346176
fig|6666666.332384.peg.2330	VFG003498(gi:123442108)(ail) attachment invasion locus protein [Ail (CVF037)]	174	10	7.78e-32	52.69	2347396	2347920
fig|6666666.332384.peg.2334	NP_274717)(mtrE) multidrug efflux pump channel protein MtrE [MtrCDE (VF0451)]	485	10	3.47e-99	56.06	2350882	2349425
fig|6666666.332384.peg.2335	VFG037718(gi:213158705)(adeG) RND family efflux transporter [AdeFGH efflux pump/transport autoinducer (CVF773)]	1055	10	0	69.97	2354066	2350899
fig|6666666.332384.peg.2336	VFG037709(gi:523531827)(adeF) Membrane-fusion protein [AdeFGH efflux pump/transport autoinducer (CVF773)]	408	10	2.74e-89	56.5	2355289	2354063
fig|6666666.332384.peg.2338	VFG031407(gi:433630073)(ctpV) Putative metal cation transporter P-type ATPase CtpV [Copper exporter (CVF658)]	762	10	0	66.72	2355566	2357854
fig|6666666.332384.peg.2342	VFG044370(gi:33521628)(qbsN) QbsN [thioquinolobactin (IA009)]	417	1	3.52e-19	53.71	2358894	2360147
fig|6666666.332384.peg.2348	VFG044122(gi:33593444)(alcR) transcriptional regulator [alcaligin (IA010)]	334	5	9.55e-43	50.17	2368519	2369523
fig|6666666.332384.peg.2349	VFG044341(gi:292489704)(foxR) ferrioxamine E receptor [desferrioxamine (IA033)]	696	10	8.27e-180	47.99	2369687	2371777
fig|6666666.332384.peg.2352	VFG043220(gi:218927899)(flbD) sigma-54 transcriptional regulator [lateral flagella (AI146)]	541	10	7.04e-70	59.81	2374718	2373093
fig|6666666.332384.peg.2353	VFG009269(gi:126433240)(icl) isocitrate lyase [Isocitrate lyase (CVF302)]	295	6	6.36e-15	42.65	2374984	2375871
fig|6666666.332384.peg.2356	VFG030387(gi:433645508)(tgs4) acyl-CoA synthetase (AMP-forming)/AMP-acid ligase II [MymA operon (CVF649)]	628	10	2.85e-28	40.71	2378693	2380579
fig|6666666.332384.peg.2357	VFG013197(gi:170717931)(hemB) Porphobilinogen synthase [Heme biosynthesis (CVF506)]	324	1	7.2e-80	61.44	2381657	2380683
fig|6666666.332384.peg.2360	VFG036009(gi:222155165)(ehaB) structural protein [EhaB, AIDA-I type (CVF744)]	1004	10	0	80.39	2382170	2385184
fig|6666666.332384.peg.2369	VFG044257(gi:151220275)(sbnD) membrane transporter protein [staphyloferrin B (IA027)]	403	4	7.63e-28	44.65	2392680	2393891
fig|6666666.332384.peg.2372	VFG043139(gi:28901366)(scrC) sensory box/GGDEF family protein SrcC [lateral flagella (AI142)]	370	1	1.39e-17	47.16	2395185	2396297
fig|6666666.332384.peg.2373	VFG022632(gi:183980850)(proC) pyrroline-5-carboxylate reductase [Proline synthesis (CVF307)]	269	10	4.27e-38	50.01	2397121	2396312
fig|6666666.332384.peg.2376	VFG042099(gi:13475322)(mlr6361) hypothetical protein [T3SS (SS026)]	181	2	6.27e-16	52.3	2397901	2398446
fig|6666666.332384.peg.2386	VFG031746(gi:315442360)(regX3) response regulator with CheY-like receiver domain and winged-helix DNA-binding domain [RegX3 (CVF667)]	229	10	6.12e-50	59.36	2407849	2408538
fig|6666666.332384.peg.2387	VFG031677(gi:118471880)(senX3) sensor histidine kinase SenX3 [SenX3 (CVF666)]	431	10	5.35e-45	54.98	2408608	2409903
fig|6666666.332384.peg.2392	VFG009680(gi:118471486)(ahpC) alkylhydroperoxide reductase [AhpC (CVF322)]	200	10	8.1e-39	60.91	2415729	2415127
fig|6666666.332384.peg.2418	VFG013568(gi:68248709)(hitB) iron(III)-transport system permease protein hFbpB [Haemophilus iron transport locus (CVF501)]	265	2	6.87e-14	48.95	2437213	2436416
fig|6666666.332384.peg.2420	VFG013573(gi:113460924)(hitC) iron(III) ABC transporter, ATP-binding protein [Haemophilus iron transport locus (CVF501)]	369	10	6.15e-66	58.56	2439188	2438079
fig|6666666.332384.peg.2428	YP_095353)(lbtC) LbtC inner membrane protein required for import of Legiobactin [Legiobactin (VF0291)]	454	1	3.96e-12	63.44	2446775	2445411
fig|6666666.332384.peg.2429	VFG010518(gi:148358759)(lidL) TPR repeat protein [Enhanced entry proteins (CVF348)]	503	6	5.08e-13	43.03	2447300	2448811
fig|6666666.332384.peg.2430	VFG010519(gi:52841586)(lpg1356) TPR repeat protein [Enhanced entry proteins (CVF348)]	497	10	2.28e-17	43.19	2448823	2450316
fig|6666666.332384.peg.2437	VFG044096(gi:15599414)(fptX) transporter [pyochelin (IA002)]	493	1	3.71e-13	44.73	2457125	2455644
fig|6666666.332384.peg.2441	VFG005556(gi:116627090)(tig/ropA) FKBP-type peptidyl-prolyl cis-trans isomerase (trigger factor) [Trigger factor (CVF149)]	432	10	3.37e-55	52.92	2458709	2460007
fig|6666666.332384.peg.2442	NP_465991)(clpP) ATP-dependent Clp protease proteolytic subunit [ClpP (VF0074)]	243	1	7.14e-97	83.51	2460146	2460877
fig|6666666.332384.peg.2447	VFG043478(gi:15603530)(comE1) hypothetical protein [Fibronectin-binding protein (AI227)]	124	1	1.71e-17	68.92	2467733	2468107
fig|6666666.332384.peg.2452	VFG044286(gi:197284144)(pbtD) pyridoxal-phosphate dependent enzyme [Proteobactin (IA034)]	351	2	3.72e-27	46.65	2473199	2472144
fig|6666666.332384.peg.2454	VFG013250(gi:148825660)(msbA) fused lipid transporter subunits of ABC superfamily: membrane component/ATP-binding component [LOS (CVF494)]	590	10	6.1e-78	53.02	2473811	2475583
fig|6666666.332384.peg.2455	VFG013249(gi:68248611)(msbA) lipid A export ATP-binding protein MsbA [LOS (CVF494)]	593	10	6.77e-79	50.28	2475576	2477357
fig|6666666.332384.peg.2462	VFG043139(gi:28901366)(scrC) sensory box/GGDEF family protein SrcC [lateral flagella (AI142)]	516	3	2.28e-42	53.33	2483173	2481623
fig|6666666.332384.peg.2466	VFG005951(gi:55821111)(eps9) exopolysaccharide biosynthesis protein [Capsule (CVF186)]	183	5	1.48e-21	59.51	2484999	2484448
fig|6666666.332384.peg.2469	VFG036998(gi:385323678)(mtrD) drug efflux transport protein MtrD [MtrCDE (CVF759)]	1049	10	0	67.28	2489443	2486294
fig|6666666.332384.peg.2470	VFG036987(gi:385855732)(mtrC) membrane fusion protein MtrC [MtrCDE (CVF759)]	397	10	3.13e-91	63.88	2490659	2489466
fig|6666666.332384.peg.2473	VFG017855(gi:153948767)(pilW) putative transposase [Type IV pili (CVF049)]	311	2	2.59e-124	74.59	2495912	2494977
fig|6666666.332384.peg.2476	VFG037536(gi:213156722)(AB57_0992) hypothetical protein [Heme utilization (CVF769)]	125	3	2.04e-15	52.85	2496759	2497136
fig|6666666.332384.peg.2484	VFG013614(gi:16273084)(hemH) ferrochelatase [Heme biosynthesis (CVF506)]	320	5	3.05e-117	67.31	2503962	2504924
fig|6666666.332384.peg.2485	VFG016039(gi:152983967)(pvdJ) thermophilic carboxylesterase Est2 [Pyoverdine (CVF551)]	217	3	9.68e-16	44.4	2505574	2504921
fig|6666666.332384.peg.2490	NP_644838)(adsA) Adenosine synthase A [AdsA (VF0422)]	550	1	3.39e-41	41.8	2510681	2512333
fig|6666666.332384.peg.2494	VFG031407(gi:433630073)(ctpV) Putative metal cation transporter P-type ATPase CtpV [Copper exporter (CVF658)]	833	10	1.56e-160	62.8	2517494	2514993
fig|6666666.332384.peg.2498	VFG026731(gi:507421126)(irtB) iron import ATP-binding/permease protein IrtB [ABC transporter (CVF316)]	225	10	1.16e-29	53.91	2519534	2520211
fig|6666666.332384.peg.2501	VFG038841(gi:145297258)(flmH) 3-oxoacyl-ACP reductase [Polar flagella (CVF786)]	256	9	1.13e-17	45.33	2522747	2521977
fig|6666666.332384.peg.2503	VFG013192(gi:170717476)(hitC) ABC transporter related [Haemophilus iron transport locus (CVF501)]	228	10	4.88e-29	52.73	2523487	2524173
fig|6666666.332384.peg.2507	NP_933683)(IlpA) immunogenic lipoprotein A [IlpA (VF0513)]	276	1	4.53e-33	53.06	2528161	2528991
fig|6666666.332384.peg.2508	VFG030704(gi:433634298)(sugC) Putative sugar-transport ATP-binding protein ABC transporter SugC [Trehalose-recycling ABC transporter (CVF651)]	338	10	2.21e-37	50.94	2529028	2530044
fig|6666666.332384.peg.2531	VFG013326(gi:113460643)(lpxH) UDP-2,3 diacylglucosamine hydrolase [LOS (CVF494)]	240	7	2.91e-78	66.2	2555489	2554767
fig|6666666.332384.peg.2532	VFG005373(gi:15900665)(slrA) peptidyl-prolyl cis-trans isomerase, cyclophilin-type [Streptococcal lipoprotein rotamase A (CVF129)]	164	5	8.03e-27	47.06	2555986	2555492
fig|6666666.332384.peg.2539	VFG021129(gi:224582380)(fimA) type-1 fimbrial protein, a chain precursor [Fim (CVF003)]	184	10	6e-131	99.03	2561138	2561692
fig|6666666.332384.peg.2540	VFG021141(gi:207856022)(fimI) major pilin protein [Fim (CVF003)]	164	10	2.18e-121	97.97	2561806	2562300
fig|6666666.332384.peg.2541	VFG021148(gi:197251405)(fimC) chaperone protein FimC [Fim (CVF003)]	230	10	1.22e-169	99.48	2562344	2563036
fig|6666666.332384.peg.2542	VFG021161(gi:194448610)(fimD) outer membrane usher protein SfmD [Fim (CVF003)]	868	10	0	99.15	2563067	2565673
fig|6666666.332384.peg.2543	NP_459542)(fimH) type I fimbriae minor fimbrial subunit FimH, adhesin [Type 1 fimbriae (VF0102)]	335	10	0	98.93	2565688	2566695
fig|6666666.332384.peg.2544	NP_459543)(fimF) type I fimbriae adaptor protein FimF [Type 1 fimbriae (VF0102)]	172	10	1.14e-125	79.02	2566705	2567223
fig|6666666.332384.peg.2545	VFG000449(gi:16763929)(fimZ) fimbrial protein Z [Type 1 fimbriae (VF0102)]	210	10	7.13e-155	80.58	2567901	2567269
fig|6666666.332384.peg.2546	VFG021193(gi:197247723)(fimY) fimbriae Y protein [Fim (CVF003)]	240	10	9.95e-179	99.54	2569210	2568488
fig|6666666.332384.peg.2548	VFG004108(gi:56414299)(fimW) fimbriae w protein [Fim (CVF003)]	198	10	7.13e-149	97.76	2570298	2569702
fig|6666666.332384.peg.2553	VFG012939(gi:110804318)(gtrB) bactoprenol glucosyl transferase [LPS glucosylation (CVF473)]	308	2	0	95.1	2574358	2573432
fig|6666666.332384.peg.2554	VFG012936(gi:110804319)(gtrA) bactoprenol-linked glucose translocase [LPS glucosylation (CVF473)]	91	2	4.3e-52	91.67	2574630	2574355
fig|6666666.332384.peg.2557	VFG024169(gi:315442612)(phoR) signal transduction histidine kinase [PhoP/R (CVF331)]	96	10	4.84e-15	59.67	2575875	2575585
fig|6666666.332384.peg.2568	VFG042313(gi:16763947)(STM0570) outer membrane esterase [ApeE (SS104)]	656	2	0	69.15	2584188	2586158
fig|6666666.332384.peg.2572	VFG042570(gi:62255469)(ldaA) LdaA [locus for diffuse adherence (lda), afimbrial adhesin (AI044)]	113	3	4.39e-19	62.08	2588413	2588754
fig|6666666.332384.peg.2575	VFG013008(gi:74311117)(entD) enterochelin synthetase, component D [Enterobactin synthesis (CVF477)]	238	10	1.1e-70	64.78	2590921	2590205
fig|6666666.332384.peg.2576	NP_752600)(fepA) ferrienterobactin outer membrane transporter [Enterobactin (VF0228)]	751	10	0	82.54	2593210	2590955
fig|6666666.332384.peg.2577	NP_752602)(fes) enterobactin/ferric enterobactin esterase [enterobactin (IA019)]	404	10	0	51.15	2593399	2594613
fig|6666666.332384.peg.2578	VFG022693(gi:333990185)(mbtH) MbtH-like protein [Mycobactin (CVF315)]	72	10	5.5e-15	57.37	2594644	2594862
fig|6666666.332384.peg.2579	NP_752604)(entF) enterobactin synthase multienzyme complex component, ATP-dependent [Enterobactin (VF0228)]	1294	10	0	76.35	2594859	2598743
fig|6666666.332384.peg.2580	VFG000927(gi:26246566)(fepE) ferric enterobactin transport protein FepE [Enterobactin (VF0228)]	378	8	0	61.92	2598993	2600129
fig|6666666.332384.peg.2581	NP_752606)(fepC) ferrienterobactin ABC transporter ATPase [Enterobactin (VF0228)]	264	10	0	86.81	2600975	2600181
fig|6666666.332384.peg.2582	VFG013037(gi:82543035)(fepG) ferric enterobactin transport protein [Enterobactin transport (CVF478)]	329	10	0	83.92	2601961	2600972
fig|6666666.332384.peg.2583	VFG013030(gi:110804581)(fepD) ferric enterobactin (enterochelin) transport [Enterobactin transport (CVF478)]	335	10	2.57e-179	80.39	2602968	2601961
fig|6666666.332384.peg.2584	NP_752609)(entS) enterobactin exporter, iron-regulated [enterobactin (IA019)]	414	2	0	84.42	2603079	2604323
fig|6666666.332384.peg.2585	VFG013016(gi:24111938)(fepB) ferric enterobactin (enterochelin) binding protein [Enterobactin transport (CVF478)]	318	9	0	76.76	2605342	2604386
fig|6666666.332384.peg.2586	VFG012991(gi:82775873)(entC) isochorismate hydroxymutase 2 [Enterobactin synthesis (CVF477)]	391	10	0	76.33	2605651	2606826
fig|6666666.332384.peg.2587	VFG012985(gi:82775874)(entE) 2,3-dihydroxybenzoate-AMP ligase [Enterobactin synthesis (CVF477)]	536	10	0	83.48	2606836	2608446
fig|6666666.332384.peg.2588	VFG012980(gi:24111940)(entB) 2,3-dihydro-2,3-dihydroxybenzoate synthetase, isochroismatase [Enterobactin synthesis (CVF477)]	285	10	0	89.66	2608460	2609317
fig|6666666.332384.peg.2589	VFG012973(gi:82775876)(entA) 2,3-dihydro-2,3-dihydroxybenzoate dehydrogenase [Enterobactin synthesis (CVF477)]	251	10	3.69e-163	83.99	2609317	2610072
fig|6666666.332384.peg.2600	VFG009680(gi:118471486)(ahpC) alkylhydroperoxide reductase [AhpC (CVF322)]	187	10	5.03e-35	52.66	2619844	2620407
fig|6666666.332384.peg.2604	VFG009608(gi:118468429)(narH) nitrate reductase, beta subunit [Nitrate reductase (CVF318)]	185	10	3.35e-20	62.25	2625376	2625933
fig|6666666.332384.peg.2615	VFG044282(gi:197284140)(pbtl) citrate lyase beta chain [Proteobactin (IA034)]	302	1	1.95e-21	47.62	2635672	2634764
fig|6666666.332384.peg.2623	VFG011228(gi:115423922)(pagP) lipid A palmitoyl transferase [LPS-modifying enzyme (CVF381)]	186	4	8.28e-42	56.49	2641552	2642112
fig|6666666.332384.peg.2640	NP_282577)(Cj1436c) aminotransferase [Capsule (VF0323)]	364	2	6.44e-20	47.72	2655148	2656242
fig|6666666.332384.peg.2648	VFG014357(gi:152984900)(fleQ) transcriptional regulator FleQ [Flagella (CVF521)]	642	10	3.8e-69	71.45	2663916	2665844
fig|6666666.332384.peg.2651	YP_096234)(lpnE) Dot/Icm type IV secretion system effector LpnE [Dot/Icm (SS047)]	282	10	1.61e-46	54.66	2667444	2666596
fig|6666666.332384.peg.2656	VFG043573(gi:15605121)(CT396) molecular chaperone DnaK [MOMP (AI392)]	559	1	1.64e-89	55.76	2673574	2671895
fig|6666666.332384.peg.2660	VFG006259(gi:59800668)(fbpC) ABC transporter, ATP-binding protein, iron related [ABC transporter (CVF197)]	241	10	6.39e-42	57.51	2676696	2675971
fig|6666666.332384.peg.2661	VFG002901(gi:108808062)(YPA_2067) histidine transport system permease protein HisQ [O-antigen (CVF043)]	224	1	1.89e-14	50.24	2677370	2676696
fig|6666666.332384.peg.2665	VFG012165(gi:110802269)(CPR_0433) transport protein ysiA [Hemolysin (CVF417)]	292	10	1.83e-44	56.85	2681969	2681091
fig|6666666.332384.peg.2672	VFG011198(gi:33594855)(wbmI) putative asparagine synthetase [LPS (CVF380)]	554	8	9.49e-47	44.82	2689108	2687444
fig|6666666.332384.peg.2673	VFG015888(gi:71737277)(PSPPH_4304) hydrolase, HAD-superfamily, subfamily IIA [Phytotoxin phaseolotoxin (CVF546)]	250	1	2.59e-30	50.6	2690150	2689398
fig|6666666.332384.peg.2686	VFG000478(gi:16764063)(fur) transcriptional repressor of iron-responsive genes (Fur family) (ferric uptake regulator) [Fur (VF0113)]	150	1	3.34e-110	100	2705357	2704905
fig|6666666.332384.peg.2692	VFG018259(gi:161618047)(pgm) Phosphoglucomutase [LPS (CVF383)]	546	7	2.64e-21	39.85	2708269	2709909
fig|6666666.332384.peg.2697	VFG022941(gi:333989572)(mprA) two component response transcriptional regulatory protein MprA [MprA/B (CVF333)]	225	10	1.35e-47	60.49	2715527	2714850
fig|6666666.332384.peg.2698	VFG023574(gi:332159934)(YE105_C0310) Multi-sensor hybrid histidine kinase [TTSS (chromosomally encoded) (CVF046)]	870	10	1.35e-23	51.72	2718136	2715524
fig|6666666.332384.peg.2700	VFG031395(gi:118616274)(ctpV) metal cation transporter p-type ATPase, CtpV [Copper exporter (CVF658)]	682	10	6.61e-53	48.88	2720846	2718798
fig|6666666.332384.peg.2704	VFG010904(gi:54293730)(iraB) di/tripeptide transporter homolog IraB [Iron acquisition/assimilation locus (CVF361)]	493	3	7.92e-13	43.44	2726230	2724749
fig|6666666.332384.peg.2710	VFG043622(gi:206577666)(fimB) tyrosine recombinase [type 1 fimbriae (AI075)]	188	10	1.78e-77	72.73	2730139	2730705
fig|6666666.332384.peg.2712	VFG026318(gi:206561579)(BCAL3235) putative UDP-galactopyranose mutase [Capsule I (CVF645)]	383	7	2.71e-171	60.01	2732528	2733679
fig|6666666.332384.peg.2714	VFG019787(gi:218890655)(PLES_19151) ORF_12; Glycosyl transferases group 1 [LPS O-antigen (P. aeruginosa) (CVF520)]	377	6	8.9e-60	49.88	2734585	2735718
fig|6666666.332384.peg.2715	VFG011488(gi:23501415)(wzm) O-antigen export system permease protein RfbD [LPS (CVF383)]	256	4	4.69e-18	48.24	2735847	2736617
fig|6666666.332384.peg.2716	NP_540333)(wzt) O-antigen export system ATP-binding protein [LPS (VF0367)]	236	10	2.87e-54	63.38	2736621	2737331
fig|6666666.332384.peg.2719	NP_282573)(Cj1432c) sugar transferase [Capsule (VF0323)]	649	2	2.04e-34	44.39	2740233	2742182
fig|6666666.332384.peg.2740	VFG036648(gi:313667886)(exbB) biopolymer transport protein [Ton system (CVF202)]	227	5	1.96e-23	49.26	2761806	2762489
fig|6666666.332384.peg.2741	VFG018806(gi:161870575)(exbD) biopolymer transport protein [Ton system (CVF202)]	142	5	3.06e-17	54.77	2762493	2762921
fig|6666666.332384.peg.2744	VFG039075(gi:222475318)(ompA) peptidoglycan-associated lipoprotein precursor [OmpA (CVF799)]	174	8	1.33e-18	57.09	2765435	2765959
fig|6666666.332384.peg.2751	VFG044185(gi:37676958)(VVA1298) phospho-2-dehydro-3-deoxyheptonate aldolase [vulnibactin (IA023)]	350	2	7.17e-110	65.6	2771144	2772196
fig|6666666.332384.peg.2754	VFG006042(gi:76788234)(cpsY) transcriptional regulator CpsY [Capsule (CVF186)]	296	1	8.34e-12	46.8	2773825	2774715
fig|6666666.332384.peg.2759	VFG044280(gi:197284138)(PMI0229) ABC transporter permease [Proteobactin (IA034)]	327	10	2.83e-153	64.12	2778913	2779896
fig|6666666.332384.peg.2760	VFG044281(gi:197284139)(PMI0230) ABC transporter ATP-binding protein [Proteobactin (IA034)]	258	10	1.31e-117	60.55	2779896	2780672
fig|6666666.332384.peg.2765	VFG038152(gi:407930985)(M3Q_301) UDP-glucose 4-epimerase [Capsule (CVF775)]	338	10	3.4e-141	71.78	2785997	2784981
fig|6666666.332384.peg.2767	VFG036559(gi:313668880)(fbpC) iron-uptake permease ATP-binding protein [ABC transporter (CVF197)]	491	10	1.05e-18	49.94	2788774	2787299
fig|6666666.332384.peg.2771	VFG013191(gi:170717477)(hitB) binding-protein-dependent transport systems inner membrane component [Haemophilus iron transport locus (CVF501)]	229	1	4.64e-14	49.15	2790849	2791538
fig|6666666.332384.peg.2772	VFG013573(gi:113460924)(hitC) iron(III) ABC transporter, ATP-binding protein [Haemophilus iron transport locus (CVF501)]	352	10	2.17e-40	57.79	2791541	2792599
fig|6666666.332384.peg.2782	VFG044396(gi:6959520)(pdtorfM) putative aminotransferase [Pyridine-2,6-dithiocarboxylic acid (PDTC) (IA030)]	429	10	5.91e-33	45.54	2804485	2803196
fig|6666666.332384.peg.2784	VFG026061(gi:107021859)(wcbT) 8-amino-7-oxononanoate synthase [Capsule I (CVF645)]	385	9	6.71e-48	48	2805609	2806766
fig|6666666.332384.peg.2788	VFG021038(gi:194445572)(slrP) leucine-rich repeat protein [TTSS effectors translocated via both systems (CVF033)]	754	10	0	92.48	2811346	2813610
fig|6666666.332384.peg.2805	VFG008825(gi:443490197)(ddrA) daunorubicin-DIM-transport ATP-binding protein ABC transporter DrrA [PDIM (phthiocerol dimycocerosate) and PGL (phenolic glycolipid) biosynthesis and transport (CVF288)]	578	10	4.09e-45	57.12	2828066	2826330
fig|6666666.332384.peg.2811	VFG038840(gi:507521851)(flmH) 3-oxoacyl-ACP reductase [Polar flagella (VF0473)]	249	10	9.68e-55	51.73	2832526	2833275
fig|6666666.332384.peg.2814	VFG031960(gi:347549024)(lap) putative alcohol-acetaldehyde dehydrogenase [Listeria adhesion protein (CVF228)]	437	9	2.23e-113	67.88	2835126	2836439
fig|6666666.332384.peg.2823	VFG036559(gi:313668880)(fbpC) iron-uptake permease ATP-binding protein [ABC transporter (CVF197)]	240	10	1.02e-46	59.41	2846450	2845728
fig|6666666.332384.peg.2824	VFG002901(gi:108808062)(YPA_2067) histidine transport system permease protein HisQ [O-antigen (CVF043)]	219	1	2.78e-24	49.06	2847106	2846447
fig|6666666.332384.peg.2825	VFG041139(gi:206558740)(bscS) periplasmic solute-binding protein [T6SS (SS193)]	248	1	1.92e-29	52.89	2847996	2847250
fig|6666666.332384.peg.2830	VFG023567(gi:332162566)(ail) attachment invasion locus protein [Ail (CVF037)]	171	10	1.33e-39	58.84	2850519	2851034
fig|6666666.332384.peg.2831	VFG013382(gi:148828173)(yhbX) tRNA modification GTPase TrmE [LOS (CVF494)]	526	10	4e-76	49.68	2852676	2851096
fig|6666666.332384.peg.2837	VFG037386(gi:184158903)(bauE) enterochelin ABC transporter ATPase [Acinetobactin (VF0467)]	531	10	2.87e-17	48.43	2856020	2857615
fig|6666666.332384.peg.2843	VFG044378(gi:28192388)(qbsC) QbsC [thioquinolobactin (IA009)]	249	2	2.26e-55	57.14	2864514	2863765
fig|6666666.332384.peg.2846	VFG016532(gi:42561491)(oppF) oligopeptide ABC transporter, permease component [Capsule (CVF591)]	623	10	9.95e-36	54.14	2866904	2868775
fig|6666666.332384.peg.2854	VFG044282(gi:197284140)(pbtl) citrate lyase beta chain [Proteobactin (IA034)]	171	1	2.8e-20	62.39	2874984	2875499
fig|6666666.332384.peg.2858	VFG029172(gi:397679176)(fadE14) acyl-CoA dehydrogenase YngJ [Mycobactin (CVF315)]	387	10	6.34e-35	51.3	2877523	2878686
fig|6666666.332384.peg.2860	VFG006042(gi:76788234)(cpsY) transcriptional regulator CpsY [Capsule (CVF186)]	296	1	4.25e-13	49.06	2881714	2880824
fig|6666666.332384.peg.2868	YP_095353)(lbtC) LbtC inner membrane protein required for import of Legiobactin [Legiobactin (VF0291)]	410	1	3.23e-12	45.61	2887296	2888528
fig|6666666.332384.peg.2880	VFG013192(gi:170717476)(hitC) ABC transporter related [Haemophilus iron transport locus (CVF501)]	377	10	1.18e-75	61.09	2898386	2899519
fig|6666666.332384.peg.2890	VFG043047(gi:16765292)(fliY) cystine transporter subunit [peritrichous flagella (AI139)]	243	5	1.77e-32	48.74	2907475	2906744
fig|6666666.332384.peg.2892	VFG002901(gi:108808062)(YPA_2067) histidine transport system permease protein HisQ [O-antigen (CVF043)]	238	1	5.05e-39	58.85	2909096	2908380
fig|6666666.332384.peg.2893	VFG043099(gi:15802355)(fliY) cystine transporter subunit [peritrichous flagella (AI140)]	243	3	2.65e-35	50.18	2909834	2909103
fig|6666666.332384.peg.2894	VFG030706(gi:397678959)(sugC) maltodextrin import ATP-binding protein MsmX [Trehalose-recycling ABC transporter (CVF651)]	242	10	8.81e-39	56.2	2910580	2909852
fig|6666666.332384.peg.2906	VFG013080(gi:31983528)(virK) VirK, required for proper localization of IcsA (VirG) at the surface of bacteria [VirK (CVF483)]	316	4	9.05e-52	55.11	2924551	2923601
fig|6666666.332384.peg.2907	VFG037711(gi:469822479)(adeF) RND efflux transporter [AdeFGH efflux pump/transport autoinducer (CVF773)]	372	5	4.07e-23	47.38	2924697	2925815
fig|6666666.332384.peg.2908	VFG036559(gi:313668880)(fbpC) iron-uptake permease ATP-binding protein [ABC transporter (CVF197)]	648	10	4.16e-32	54.96	2925812	2927758
fig|6666666.332384.peg.2912	NP_464522)(clpE) ATP-dependent protease [ClpE (VF0073)]	747	10	6.64e-176	62.29	2928817	2931060
fig|6666666.332384.peg.2919	VFG013249(gi:68248611)(msbA) lipid A export ATP-binding protein MsbA [LOS (CVF494)]	573	10	3.69e-56	50.4	2938528	2936807
fig|6666666.332384.peg.2920	VFG013252(gi:33152665)(msbA) ABC transporter ATP-binding protein MsbA [LOS (CVF494)]	588	10	4.48e-44	48.26	2940295	2938529
fig|6666666.332384.peg.2923	VFG040864(gi:49185046)(essC) FtsK/SpoIIIE family protein [T7SS (SS201)]	1295	10	4.14e-17	47.67	2942554	2946441
fig|6666666.332384.peg.2927	VFG024074(gi:315443211)(narG) respiratory nitrate reductase subunit alpha [Nitrate reductase (CVF318)]	814	10	1.83e-18	41.23	2950337	2952781
fig|6666666.332384.peg.2934	VFG021015(gi:224582781)(sopD2) secreted protein sopD [TTSS-2 translocated effectors (CVF035)]	319	10	0	97.48	2958769	2959728
fig|6666666.332384.peg.2946	VFG013253(gi:113461164)(msbA) lipid A export ATP-binding/permease protein [LOS (CVF494)]	582	10	0	74.99	2975154	2976902
fig|6666666.332384.peg.2947	NP_438232)(lpxK) tetraacyldisaccharide 4'-kinase [LOS (CVF494)]	325	10	3.51e-112	60.51	2976899	2977876
fig|6666666.332384.peg.2950	VFG038845(gi:507522470)(nueA) 3-deoxy-D-manno-octulosonate cytidylyltransferase [Polar flagella (VF0473)]	248	10	1.53e-124	73.36	2979383	2980129
fig|6666666.332384.peg.2952	YP_096633)(lpg2628) Dot/Icm type IV secretion system effector [Dot/Icm (VF0156)]	258	1	7.26e-28	51.03	2981989	2981213
fig|6666666.332384.peg.2962	VFG043568(gi:16764916)(ompD) outer membrane porin precursor [Hek (AI384)]	363	2	1.34e-135	56.67	2995597	2994506
fig|6666666.332384.peg.3012	VFG004007(gi:62181149)(gogB) Gifsy-1 prophage leucine-rich repeat protein [TTSS-2 translocated effectors (CVF035)]	488	10	0	75.88	3040892	3039426
fig|6666666.332384.peg.3020	YP_405013)(shuV) ATP-binding component of hemin transport system [Shu (VF0256)]	635	10	1.79e-15	49.18	3051257	3053164
fig|6666666.332384.peg.3022	NP_797990)(VP1611) multivalent adhesion molecule MAM7 [MAM7 (VF0512)]	546	1	9.18e-46	52.5	3054437	3056077
fig|6666666.332384.peg.3028	VFG043544(gi:15800816)(Z1307) outer membrane protein A [OmpA (AI330)]	358	10	0	65.51	3061293	3060217
fig|6666666.332384.peg.3040	VFG003674(gi:62181377)(hilD) regulatory helix-turn-helix proteins, araC family [TTSS (SPI-1 encode) (CVF031)]	262	10	1.38e-13	53.57	3071989	3072777
fig|6666666.332384.peg.3046	VFG021000(gi:198243562)(pipB) PipB [TTSS-2 translocated effectors (CVF035)]	291	10	0	98.83	3076575	3075700
fig|6666666.332384.peg.3048	VFG012731(gi:82524578)(ipgE) IpgE [Mxi-Spa TTSA (type III secretion apparatus) (CVF462)]	113	2	1.85e-13	54.39	3077464	3077123
fig|6666666.332384.peg.3049	VFG020651(gi:194448131)(sopB/sigD) inositol phosphate phosphatase SopB [TTSS-1 translocated effectors (CVF034)]	561	10	0	99.47	3079166	3077481
fig|6666666.332384.peg.3051	VFG043605(gi:157150938)(abpB) amylase-binding protein B [amylase-binding protein B (AbpB) (AI437)]	520	1	5.22e-53	45.97	3081450	3079888
fig|6666666.332384.peg.3052	VFG027133(gi:433625843)(phoR) Two component system response sensor kinase membrane associated PhoR [PhoP/R (CVF331)]	454	10	6.56e-25	43.74	3082894	3081530
fig|6666666.332384.peg.3053	VFG009865(gi:120405794)(mprA) two component transcriptional regulator, winged helix family [MprA/B (CVF333)]	226	10	9.88e-56	62.34	3083567	3082887
fig|6666666.332384.peg.3056	NP_250946)(pvcC) paerucumarin biosynthesis protein PvcC [pyoverdine (IA001)]	520	1	4.07e-147	64.08	3086495	3084933
fig|6666666.332384.peg.3063	VFG044353(gi:307130376)(acsB) 2,4-dihydroxyhept-2-ene-1,7-dioic acid aldolase [achromobactin (IA011)]	263	4	6.87e-31	50.19	3092382	3093173
fig|6666666.332384.peg.3089	VFG044370(gi:33521628)(qbsN) QbsN [thioquinolobactin (IA009)]	426	1	3.88e-11	44.86	3120845	3122125
fig|6666666.332384.peg.3096	NP_460110)(csgG) curli production assembly/transport protein CsgG [Agf (VF0103)]	277	4	0	99.37	3127509	3126676
fig|6666666.332384.peg.3097	NP_460111)(csgF) curli production assembly/transport protein CsgF [Agf (VF0103)]	138	8	1.5e-99	98.55	3127952	3127536
fig|6666666.332384.peg.3098	NP_460112)(csgE) curli production assembly/transport protein CsgE [Agf (VF0103)]	131	5	1.07e-95	98.47	3128374	3127979
fig|6666666.332384.peg.3099	NP_460113)(csgD) DNA-binding transcriptional regulator CsgD [curli fibers/thin aggregative fimbriae (AGF) (AI094)]	216	7	5.78e-163	98.85	3129029	3128379
fig|6666666.332384.peg.3100	NP_460114)(csgB) minor curlin subunit precursor, curli nucleator protein CsgB [Agf (VF0103)]	151	10	6.91e-108	96.62	3129802	3130257
fig|6666666.332384.peg.3101	NP_460115)(csgA) curlin major subunit CsgA [Agf (VF0103)]	151	6	2.01e-105	91.64	3130299	3130754
fig|6666666.332384.peg.3102	NP_460116)(csgC) curli assembly protein CsgC [Agf (VF0103)]	108	8	3.75e-74	96.75	3130816	3131142
fig|6666666.332384.peg.3105	VFG037209(gi:469823054)(plcD) phospholipase D protein [Phospholipase D (CVF767)]	434	6	2.58e-110	58.16	3132338	3133642
fig|6666666.332384.peg.3111	VFG044257(gi:151220275)(sbnD) membrane transporter protein [staphyloferrin B (IA027)]	404	5	2.44e-32	46.65	3141128	3139914
fig|6666666.332384.peg.3112	VFG013437(gi:68249956)(htrB) lipid A biosynthesis lauroyl acyltransferase [LOS (CVF494)]	306	10	2.19e-120	64.72	3142203	3141283
fig|6666666.332384.peg.3114	VFG043388(gi:15645899)(fliZ) hypothetical protein [Pse5Ac7Ac (AI150)]	191	1	5.57e-25	48.91	3144102	3143527
fig|6666666.332384.peg.3128	VFG016412(gi:49478940)(BT9727_4951) conserved hypothetical protein, possible MVIN-like virulence factor [Polysaccharide capsule (CVF567)]	524	1	1.47e-28	50.14	3153621	3155195
fig|6666666.332384.peg.3129	VFG043019(gi:16764527)(flgN) FlgK/FlgL export chaperone [peritrichous flagella (AI139)]	130	7	1.7e-92	67.61	3155669	3155277
fig|6666666.332384.peg.3130	VFG043020(gi:16764528)(flgM) anti-sigma28 factor FlgM [peritrichous flagella (AI139)]	97	4	4.08e-66	78	3155997	3155704
fig|6666666.332384.peg.3131	VFG043021(gi:16764529)(flgA) flagellar basal body P-ring biosynthesis protein FlgA [peritrichous flagella (AI139)]	219	10	4.18e-160	69.3	3156748	3156089
fig|6666666.332384.peg.3132	VFG043022(gi:16764530)(flgB) flagellar basal body rod protein FlgB [peritrichous flagella (AI139)]	138	10	8.74e-100	76.8	3156905	3157321
fig|6666666.332384.peg.3133	VFG043023(gi:16764531)(flgC) flagellar basal body rod protein FlgC [peritrichous flagella (AI139)]	134	10	1.21e-94	87.27	3157325	3157729
fig|6666666.332384.peg.3134	VFG043024(gi:16764532)(flgD) flagellar basal body rod modification protein [peritrichous flagella (AI139)]	232	10	5.01e-166	82.97	3157741	3158439
fig|6666666.332384.peg.3135	VFG043025(gi:16764533)(flgE) flagellar hook protein FlgE [peritrichous flagella (AI139)]	403	10	0	68.26	3158466	3159677
fig|6666666.332384.peg.3136	VFG043026(gi:16764534)(flgF) flagellar basal body rod protein FlgF [peritrichous flagella (AI139)]	251	10	0	79.66	3159698	3160453
fig|6666666.332384.peg.3137	VFG043027(gi:16764535)(flgG) flagellar basal body rod protein FlgG [peritrichous flagella (AI139)]	260	10	0	92.7	3160467	3161249
fig|6666666.332384.peg.3138	VFG043028(gi:16764536)(flgH) flagellar basal body L-ring protein [peritrichous flagella (AI139)]	221	10	1.54e-163	84.54	3161337	3162002
fig|6666666.332384.peg.3139	VFG043029(gi:16764537)(flgI) flagellar basal body P-ring protein [peritrichous flagella (AI139)]	365	10	0	86.65	3162014	3163111
fig|6666666.332384.peg.3140	VFG043030(gi:16764538)(flgJ) flagellar rod assembly protein/muramidase FlgJ [peritrichous flagella (AI139)]	316	10	0	75.75	3163111	3164061
fig|6666666.332384.peg.3141	VFG043031(gi:16764539)(flgK) flagellar hook-associated protein FlgK [peritrichous flagella (AI139)]	553	10	0	70.98	3164126	3165787
fig|6666666.332384.peg.3142	VFG043032(gi:16764540)(flgL) flagellar hook-associated protein FlgL [peritrichous flagella (AI139)]	317	10	0	76.31	3165802	3166755
fig|6666666.332384.peg.3152	VFG043688(gi:112292713)(clbG) putative malonyl-CoA transacylase [colibactin (TX033)]	309	10	4.13e-39	47.66	3176939	3177868
fig|6666666.332384.peg.3153	VFG038840(gi:507521851)(flmH) 3-oxoacyl-ACP reductase [Polar flagella (VF0473)]	244	10	1.15e-138	58.65	3177881	3178615
fig|6666666.332384.peg.3154	NP_540392)(acpXL) acyl carrier protein [LPS (CVF383)]	78	1	1.29e-26	73.08	3178771	3179007
fig|6666666.332384.peg.3155	VFG009135(gi:383308045)(kasB) 3-oxoacyl-(acyl carrier protein) synthase II [FAS-II (CVF300)]	413	10	2.99e-98	56.57	3179093	3180334
fig|6666666.332384.peg.3162	VFG044124(gi:33593446)(fauA) ferric alcaligin siderophore receptor [alcaligin (IA010)]	724	10	3.79e-147	54.22	3188719	3186545
fig|6666666.332384.peg.3177	VFG036559(gi:313668880)(fbpC) iron-uptake permease ATP-binding protein [ABC transporter (CVF197)]	233	10	3.16e-36	55.83	3202527	3203228
fig|6666666.332384.peg.3182	VFG030621(gi:118463177)(sugB) ABC transporter permease [Trehalose-recycling ABC transporter (CVF651)]	249	10	2.45e-12	49.02	3208154	3207405
fig|6666666.332384.peg.3184	VFG020984(gi:207857269)(sifA) secreted effector protein [TTSS-2 translocated effectors (CVF035)]	336	10	0	90.67	3209510	3208500
fig|6666666.332384.peg.3187	VFG030697(gi:379753298)(sugC) ABC transporter, ATP-binding protein SugC [Trehalose-recycling ABC transporter (CVF651)]	378	10	1.47e-84	70.66	3211822	3210686
fig|6666666.332384.peg.3191	VFG000474(gi:16764585)(phoQ) sensor kinase protein [PhoPQ (VF0111)]	487	10	0	67.45	3217345	3215882
fig|6666666.332384.peg.3192	VFG000475(gi:16764586)(phoP) response regulator [PhoPQ (VF0111)]	224	10	8.94e-166	84.29	3218019	3217345
fig|6666666.332384.peg.3213	NP_490501)(rck) resistance to complement killing [Rck (VF0108)]	185	10	2.95e-61	53.63	3235981	3236538
fig|6666666.332384.peg.3218	VFG045327(gi:52842404)(ibpA) global stress protein GspA [GspA (VF0167)]	156	1	9.97e-23	57.82	3239228	3239698
fig|6666666.332384.peg.3227	VFG036553(gi:385342368)(fbpC) iron(III) ABC transporter ATP-binding protein [ABC transporter (CVF197)]	265	10	7.35e-19	48.22	3246242	3247039
fig|6666666.332384.peg.3228	VFG022788(gi:169629347)(irtB) ABC transporter ATP-binding protein [ABC transporter (CVF316)]	196	10	7.78e-15	46.85	3247033	3247623
fig|6666666.332384.peg.3250	VFG044371(gi:40204913)(qbsM) QbsM [thioquinolobactin (IA009)]	394	1	3.48e-45	49.38	3259646	3258462
fig|6666666.332384.peg.3264	VFG005356(gi:116516442)(plr/gapA) glyceraldehyde-3-phosphate dehydrogenase, type I [Streptococcal plasmin receptor/GAPDH (CVF123)]	331	10	3.56e-113	66.33	3273062	3272067
fig|6666666.332384.peg.3265	VFG037105(gi:385337152)(msrA/B(pilB)) peptide methionine sulfoxide reductase MsrA/MsrB [includes: thioredoxin, peptide methionine sulfoxide reductase MsrA (protein-methionine-S-oxide reductase; peptide Met(O) reductase) and peptide methio [Methionine sulphoxide reductase (CVF762)]	137	8	9.84e-36	65.73	3273404	3273817
fig|6666666.332384.peg.3269	VFG030295(gi:118619910)(adhD) zinc-type alcohol dehydrogenase AdhD [MymA operon (CVF649)]	358	1	2.71e-14	42.36	3275030	3276106
fig|6666666.332384.peg.3270	VFG044370(gi:33521628)(qbsN) QbsN [thioquinolobactin (IA009)]	459	1	1.81e-14	42.51	3276133	3277512
fig|6666666.332384.peg.3271	VFG030301(gi:183980161)(adhD) zinc-containing alcohol dehydrogenase NAD- dependent, AdhD [MymA operon (CVF649)]	347	10	1.39e-23	42.76	3277523	3278566
fig|6666666.332384.peg.3288	VFG015897(gi:71734081)(argD) ornithine aminotransferase [Phytotoxin phaseolotoxin (CVF546)]	408	10	6.54e-50	47.47	3294941	3296167
fig|6666666.332384.peg.3304	VFG037032(gi:194099998)(katA) protein KatA [Catalase (CVF760)]	750	10	9.82e-122	57.69	3312113	3309861
fig|6666666.332384.peg.3324	VFG043551(gi:15827894)(ML1683) histone-like protein [histone-like protein (Hlp)/laminin-binding protein (LBP) (AI354)]	99	1	6.77e-14	56.52	3331815	3332114
fig|6666666.332384.peg.3325	VFG044190(gi:49474051)(hutC) hemin ABC transporter, permease protein [direct heme uptake system (IA054)]	326	10	8.18e-64	61.75	3332317	3333297
fig|6666666.332384.peg.3327	NP_756180)(chuV) ATP-binding hydrophilic protein ChuV [Chu (VF0227)]	245	10	2.72e-35	50.59	3333952	3334689
fig|6666666.332384.peg.3329	YP_540131)(sfaY) regulatory protein SfaY [S fimbriae (VF0222)]	237	2	1.46e-14	46.21	3335544	3336257
fig|6666666.332384.peg.3332	VFG044185(gi:37676958)(VVA1298) phospho-2-dehydro-3-deoxyheptonate aldolase [vulnibactin (IA023)]	348	2	3.87e-120	68.37	3339190	3338144
fig|6666666.332384.peg.3336	VFG030400(gi:333989012)(fadD13) fatty-acid--CoA ligase [MymA operon (CVF649)]	546	10	6.28e-77	48.38	3344576	3342936
fig|6666666.332384.peg.3342	VFG044398(gi:6959522)(pdtorfO) putative acyl-CoA dehydrogenase [Pyridine-2,6-dithiocarboxylic acid (PDTC) (IA030)]	383	10	8.08e-42	45.91	3350674	3349523
fig|6666666.332384.peg.3356	VFG026731(gi:507421126)(irtB) iron import ATP-binding/permease protein IrtB [ABC transporter (CVF316)]	248	10	1.79e-17	47.83	3367016	3367762
fig|6666666.332384.peg.3358	VFG043141(gi:28901368)(scrA) aminotransferase ScrA [lateral flagella (AI142)]	406	1	4.62e-11	42.42	3369005	3370225
fig|6666666.332384.peg.3371	VFG022803(gi:333989790)(narH) NarH [Nitrate reductase (CVF318)]	244	10	5.15e-26	58.06	3384310	3383576
fig|6666666.332384.peg.3372	VFG038761(gi:145298503)(flrB) two-component system flagellar sensor histidine kinase FlrB [Polar flagella (CVF786)]	582	7	2.26e-16	46.26	3384522	3386270
fig|6666666.332384.peg.3373	VFG011626(gi:17988319)(bvrR) Transcriptional regulatory protein BvrR [BvrR-BvrS (VF0368)]	212	9	5.05e-14	50.24	3386227	3386865
fig|6666666.332384.peg.3378	VFG000492(gi:16764741)(ssrB) transcriptional activator [SPI-2 encoded T3SS (SS021)]	212	10	3.56e-158	81.65	3390071	3389433
fig|6666666.332384.peg.3379	VFG020695(gi:198243220)(ssrA) secretion system regulator:Sensor component [TTSS (SPI-2 encode) (CVF032)]	920	10	0	99.72	3392864	3390102
fig|6666666.332384.peg.3380	VFG020709(gi:194734057)(ssaC) type III secretion outer membrane pore, YscC/HrcC family [TTSS (SPI-2 encode) (CVF032)]	497	10	0	99.56	3393668	3395161
fig|6666666.332384.peg.3381	VFG020714(gi:207857099)(ssaD) putative pathogenicity island protein [TTSS (SPI-2 encode) (CVF032)]	399	10	0	99.72	3395154	3396353
fig|6666666.332384.peg.3382	VFG020725(gi:194448987)(ssaE) type III secretion system protein, YseE family [TTSS (SPI-2 encode) (CVF032)]	77	9	3.7e-49	99.12	3396370	3396603
fig|6666666.332384.peg.3383	VFG020738(gi:194449582)(sseB) secretion system effector SseB [TTSS (SPI-2 encode) (CVF032)]	196	10	1.13e-143	97.56	3397116	3397706
fig|6666666.332384.peg.3384	VFG020744(gi:198241901)(sscA) type III secretion low calcium response chaperone LcrH/SycD [TTSS (SPI-2 encode) (CVF032)]	157	10	3.39e-117	98.72	3397703	3398176
fig|6666666.332384.peg.3385	VFG020756(gi:194450436)(sseC) translocation machinery component [TTSS (SPI-2 encode) (CVF032)]	484	10	0	98.82	3398179	3399633
fig|6666666.332384.peg.3386	VFG020762(gi:198246043)(sseD) translocation machinery component [TTSS (SPI-2 encode) (CVF032)]	167	10	1.64e-117	96.83	3399733	3400236
fig|6666666.332384.peg.3387	NP_460367)(sseE) type III secretion system effector SseE [TTSS(SPI-2 encode) (VF0321)]	138	7	3.19e-99	91.87	3400239	3400655
fig|6666666.332384.peg.3388	NP_460368)(sscB) chaperone for sseF [SPI-2 encoded T3SS (SS021)]	144	9	4.17e-107	77.54	3400707	3401141
fig|6666666.332384.peg.3389	VFG020936(gi:207857090)(sseF) putative pathogenicity island effector protein [TTSS-2 translocated effectors (CVF035)]	260	10	0	98.62	3401157	3401939
fig|6666666.332384.peg.3390	VFG020944(gi:198245779)(sseG) secreted effector protein [TTSS-2 translocated effectors (CVF035)]	229	10	8.77e-172	98.67	3401936	3402625
fig|6666666.332384.peg.3391	NP_460371)(ssaG) type III secretion system needle filament protein SsaG [TTSS(SPI-2 encode) (VF0321)]	71	7	6.85e-47	81.56	3402719	3402934
fig|6666666.332384.peg.3392	VFG003886(gi:62179998)(ssaH) Secretion system apparatus SsaH [TTSS (SPI-2 encode) (CVF032)]	96	6	9.92e-64	94.75	3402912	3403202
fig|6666666.332384.peg.3393	VFG020810(gi:194450501)(ssaI) type III secretion system apparatus protein [TTSS (SPI-2 encode) (CVF032)]	87	9	1.4e-58	95.53	3403199	3403462
fig|6666666.332384.peg.3394	NP_460374)(ssaJ) type III secretion system inner MS ring protein SsaJ [TTSS(SPI-2 encode) (VF0321)]	215	10	1.27e-161	98.56	3403561	3404208
fig|6666666.332384.peg.3395	VFG023588(gi:332159952)(YE105_C0328) hypothetical protein [TTSS (chromosomally encoded) (CVF046)]	182	4	8.57e-22	54.05	3404226	3404774
fig|6666666.332384.peg.3396	VFG020826(gi:207857083)(ssaK) putative pathogenicity island protein [TTSS (SPI-2 encode) (CVF032)]	224	10	5.31e-169	99.14	3404771	3405445
fig|6666666.332384.peg.3397	VFG020835(gi:207857082)(ssaL) putative secretion system protein [TTSS (SPI-2 encode) (CVF032)]	330	10	0	99.39	3405435	3406427
fig|6666666.332384.peg.3398	NP_460378)(ssaM) type III secretion system protein SsaM [TTSS(SPI-2 encode) (VF0321)]	122	6	3.13e-89	99.32	3406485	3406853
fig|6666666.332384.peg.3399	NP_460379)(ssaV) type III secretion system major export apparatus protein ssaV [TTSS(SPI-2 encode) (VF0321)]	658	10	0	94.58	3406907	3408883
fig|6666666.332384.peg.3400	VFG020862(gi:207857079)(ssaN) type III secretion system ATPase [TTSS (SPI-2 encode) (CVF032)]	433	10	0	99.7	3408873	3410174
fig|6666666.332384.peg.3401	VFG003926(gi:62180007)(ssaO) Secretion system apparatus SsaO [TTSS (SPI-2 encode) (CVF032)]	125	8	4.25e-87	99	3410177	3410554
fig|6666666.332384.peg.3402	VFG020879(gi:198245704)(ssaP) secretion system apparatus protein SsaP [TTSS (SPI-2 encode) (CVF032)]	113	7	2.82e-83	98.34	3410568	3410909
fig|6666666.332384.peg.3403	VFG020888(gi:198245358)(ssaQ) type III secretion system protein [TTSS (SPI-2 encode) (CVF032)]	322	10	0	99.5	3410890	3411858
fig|6666666.332384.peg.3404	NP_460384)(ssaR) type III secretion system minor export apparatus protein SsaR [TTSS(SPI-2 encode) (VF0321)]	215	10	1.1e-152	89.6	3411926	3412573
fig|6666666.332384.peg.3405	VFG020911(gi:224584068)(ssaT) putative type III secretion protein [TTSS (SPI-2 encode) (CVF032)]	259	10	0	99.42	3412837	3413616
fig|6666666.332384.peg.3406	NP_460387)(ssaU) type III secretion system export apparatus switch protein SsaU [TTSS(SPI-2 encode) (VF0321)]	352	10	0	95.98	3413613	3414671
fig|6666666.332384.peg.3409	VFG009048(gi:433629554)(pcaA) Mycolic acid synthase PcaA (cyclopropane synthase) [Proximal cyclopropane synthase of alpha mycolates (CVF285)]	382	10	1.13e-43	50.44	3418564	3417416
fig|6666666.332384.peg.3410	YP_095353)(lbtC) LbtC inner membrane protein required for import of Legiobactin [Legiobactin (VF0291)]	401	3	2.31e-22	46.28	3420059	3418854
fig|6666666.332384.peg.3413	YP_096960)(sodB) superoxide dismutase [SodB (VF0169)]	193	10	6.14e-100	57.18	3423175	3422594
fig|6666666.332384.peg.3414	VFG032106(gi:347547992)(iap/cwhA) putative extracellular protein P60 [Cell wall hydrolase (CVF234)]	273	10	1.03e-17	54.24	3424123	3423302
fig|6666666.332384.peg.3422	NP_460019)(sodCI) Gifsy-2 prophage: superoxide dismutase precursor (Cu-Zn) [SodCI (VF0109)]	173	4	1.18e-65	68.62	3429231	3429752
fig|6666666.332384.peg.3424	VFG036942(gi:194099567)(farA) Efflux pump protein, fatty acid resistance [FarAB (CVF758)]	286	10	1.31e-21	42.9	3432627	3431767
fig|6666666.332384.peg.3430	VFG015523(gi:116052253)(phzG1) probable pyrodoxamine 5'-phosphate oxidase [Phenazines biosynthesis (CVF536)]	218	4	2.06e-31	53.01	3435885	3436541
fig|6666666.332384.peg.3434	VFG010904(gi:54293730)(iraB) di/tripeptide transporter homolog IraB [Iron acquisition/assimilation locus (CVF361)]	501	3	5.34e-61	50.91	3441136	3439631
fig|6666666.332384.peg.3450	VFG013187(gi:170719141)(manA) mannose-6-phosphate isomerase, class I [Exopolysaccharide (CVF495)]	391	3	5.96e-64	52.73	3455735	3454560
fig|6666666.332384.peg.3454	VFG038245(gi:407931632)(bfmS) signal transduction histidine kinase [Two-component system (CVF778)]	433	10	3.58e-47	51.02	3461455	3460154
fig|6666666.332384.peg.3456	VFG043568(gi:16764916)(ompD) outer membrane porin precursor [Hek (AI384)]	383	2	2.65e-164	59.59	3464577	3463426
fig|6666666.332384.peg.3458	VFG038216(gi:384130704)(bfmR) putative response regulator (activator) in two-component regulatory system (OmpR family) [Two-component system (CVF778)]	243	10	1.92e-69	54.66	3465787	3465056
fig|6666666.332384.peg.3476	VFG030691(gi:183984175)(sugC) sugar-transport ATP-binding protein ABC transporter SugC [Trehalose-recycling ABC transporter (CVF651)]	382	10	2.87e-48	56.49	3483433	3482285
fig|6666666.332384.peg.3483	VFG006720(gi:116873066)(lap) aldehyde-alcohol dehydrogenase protein [Listeria adhesion protein (CVF228)]	570	10	1.07e-146	65.21	3487957	3489669
fig|6666666.332384.peg.3484	VFG024074(gi:315443211)(narG) respiratory nitrate reductase subunit alpha [Nitrate reductase (CVF318)]	811	7	7.85e-17	41.07	3492297	3489862
fig|6666666.332384.peg.3485	VFG024074(gi:315443211)(narG) respiratory nitrate reductase subunit alpha [Nitrate reductase (CVF318)]	812	10	1.06e-18	41.18	3494834	3492396
fig|6666666.332384.peg.3492	VFG030307(gi:433643279)(adhD) Putative zinc-type alcohol dehydrogenase AdhD (aldehyde reductase) [MymA operon (CVF649)]	339	10	5.27e-20	40.76	3498916	3499935
fig|6666666.332384.peg.3498	VFG038840(gi:507521851)(flmH) 3-oxoacyl-ACP reductase [Polar flagella (VF0473)]	248	10	1.17e-27	47.87	3504991	3504245
fig|6666666.332384.peg.3507	VFG042526(gi:3372510)(afrR) transcriptional activator AfrR [adhesive factor/rabbit 1 (AF/R1) pili (AI035)]	127	1	4.87e-18	65.69	3512908	3512525
fig|6666666.332384.peg.3517	VFG043568(gi:16764916)(ompD) outer membrane porin precursor [Hek (AI384)]	372	2	5.04e-137	55.22	3521847	3522965
fig|6666666.332384.peg.3528	VFG032498(gi:404281681)(bsh) bile salt hydrolase [Bile-salt hydrolase (CVF250)]	362	10	4.4e-15	41.88	3530768	3531856
fig|6666666.332384.peg.3530	VFG030293(gi:108801614)(adhD) alcohol dehydrogenase GroES-like protein [MymA operon (CVF649)]	341	2	3.52e-12	43.21	3533777	3532752
fig|6666666.332384.peg.3531	YP_094583)(phtA) major facilitator family transporter, phagosomal transporter [Pht (VF0337)]	428	1	6.76e-11	44.24	3535038	3533752
fig|6666666.332384.peg.3557	VFG030295(gi:118619910)(adhD) zinc-type alcohol dehydrogenase AdhD [MymA operon (CVF649)]	336	10	4.5e-33	44.93	3562286	3563296
fig|6666666.332384.peg.3559	VFG009608(gi:118468429)(narH) nitrate reductase, beta subunit [Nitrate reductase (CVF318)]	294	10	8.68e-13	51.94	3564920	3564036
fig|6666666.332384.peg.3563	VFG043568(gi:16764916)(ompD) outer membrane porin precursor [Hek (AI384)]	362	2	0	72.11	3569663	3570751
fig|6666666.332384.peg.3565	VFG044351(gi:307130374)(yhcA) Inner membrane protein of tripartite multidrug resistance system [achromobactin (IA011)]	495	10	8.38e-26	45.08	3572787	3571300
fig|6666666.332384.peg.3567	VFG022816(gi:169630604)(narK2) integral membrane nitrite extrusion protein NarK3 [Nitrate/nitrite transporter (CVF320)]	412	1	5.87e-61	53.04	3573847	3575085
fig|6666666.332384.peg.3568	VFG009599(gi:119867330)(narG) nitrate reductase, alpha subunit [Nitrate reductase (CVF318)]	1246	10	0	64.46	3575177	3578917
fig|6666666.332384.peg.3569	VFG009606(gi:41408717)(narH) NarH [Nitrate reductase (CVF318)]	514	10	0	72.94	3578914	3580458
fig|6666666.332384.peg.3571	VFG009635(gi:145222747)(narI) respiratory nitrate reductase, gamma subunit [Nitrate reductase (CVF318)]	226	10	7.24e-36	53.9	3581150	3581830
fig|6666666.332384.peg.3572	VFG015519(gi:152986215)(phzF1) probable phenazine biosynthesis protein [Phenazines biosynthesis (CVF536)]	297	3	7.27e-24	45.73	3581936	3582829
fig|6666666.332384.peg.3574	NP_460542)(steA) type III secretion system effector SteA [SPI-1 encoded T3SS (SS010)]	210	1	4.8e-139	94.29	3584627	3583995
fig|6666666.332384.peg.3578	YP_406304)(senB) enterotoxin [ShET2 (VF0258)]	353	3	5.99e-29	48.47	3588137	3587076
fig|6666666.332384.peg.3579	VFG044394(gi:6959518)(pdtorfK) putative receptor precursor [Pyridine-2,6-dithiocarboxylic acid (PDTC) (IA030)]	706	1	9.12e-15	37.7	3588401	3590521
fig|6666666.332384.peg.3593	VFG020995(gi:194444447)(sifB) secreted effector protein [TTSS-2 translocated effectors (CVF035)]	316	10	0	94.98	3606663	3607613
fig|6666666.332384.peg.3612	VFG043388(gi:15645899)(fliZ) hypothetical protein [Pse5Ac7Ac (AI150)]	191	1	2.98e-16	47.37	3624112	3623537
fig|6666666.332384.peg.3618	VFG043040(gi:16765261)(tar/cheM) methyl accepting chemotaxis protein II [peritrichous flagella (AI139)]	535	10	3.12e-117	64.36	3631967	3630360
fig|6666666.332384.peg.3619	VFG030323(gi:479057051)(adhD) putative ZINC-TYPE ALCOHOL DEHYDROGENASE ADHD (ALDEHYDE REDUCTASE) [MymA operon (CVF649)]	372	10	7.8e-64	52.93	3633272	3632154
fig|6666666.332384.peg.3624	NP_460590)(sseJ) type III secretion system effector SseJ, glycerophospholipid:cholesterol acyltransferase [TTSS(SPI-2 encode) (VF0321)]	408	10	0	94.44	3635774	3637000
fig|6666666.332384.peg.3626	VFG043099(gi:15802355)(fliY) cystine transporter subunit [peritrichous flagella (AI140)]	253	2	6.88e-18	45.09	3638372	3639133
fig|6666666.332384.peg.3627	VFG002901(gi:108808062)(YPA_2067) histidine transport system permease protein HisQ [O-antigen (CVF043)]	215	1	1.03e-15	54.03	3639140	3639787
fig|6666666.332384.peg.3628	VFG036553(gi:385342368)(fbpC) iron(III) ABC transporter ATP-binding protein [ABC transporter (CVF197)]	243	10	7.32e-46	55.03	3639812	3640543
fig|6666666.332384.peg.3653	VFG043040(gi:16765261)(tar/cheM) methyl accepting chemotaxis protein II [peritrichous flagella (AI139)]	364	10	3.15e-67	62.57	3666852	3665758
fig|6666666.332384.peg.3666	VFG013647(gi:153949538)(inv) putative invasin [Invasin (CVF041)]	660	10	5.31e-53	48.91	3677663	3675681
fig|6666666.332384.peg.3668	VFG042570(gi:62255469)(ldaA) LdaA [locus for diffuse adherence (lda), afimbrial adhesin (AI044)]	283	3	7.31e-33	52.05	3678883	3679734
fig|6666666.332384.peg.3672	NP_687682)(cylG) 3-ketoacyl-ACP-reductase CylG [Beta-hemolysin/cytolysin (CVF171)]	237	10	8.42e-35	49.11	3682480	3683193
fig|6666666.332384.peg.3675	NP_250948)(ptxR) transcriptional regulator PtxR [pyoverdine (IA001)]	301	1	1.6e-27	50.66	3685335	3684430
fig|6666666.332384.peg.3677	VFG032255(gi:289435537)(oppA) oligopeptide ABC transporter substrate-binding protein [Oligopeptide-binding protein (CVF240)]	537	9	1.71e-56	49.36	3688093	3686480
fig|6666666.332384.peg.3681	VFG043148(gi:28901393)(lafK) putative two-component response regulator [lateral flagella (AI142)]	513	10	2.39e-75	58.08	3692204	3690663
fig|6666666.332384.peg.3689	VFG041031(gi:15597555)(sfa3) transcriptional regulator [HSI-3 (SS180)]	331	10	4.06e-68	59.35	3697054	3698049
fig|6666666.332384.peg.3690	VFG006783(gi:46908430)(oppA) oligopeptide ABC transporter, oligopeptide-binding protein [Oligopeptide-binding protein (CVF240)]	528	9	3.24e-13	43.6	3698224	3699810
fig|6666666.332384.peg.3693	VFG016532(gi:42561491)(oppF) oligopeptide ABC transporter, permease component [Capsule (CVF591)]	330	10	5.17e-23	50.55	3701649	3702641
fig|6666666.332384.peg.3694	VFG030684(gi:120405436)(sugC) ABC transporter--like protein [Trehalose-recycling ABC transporter (CVF651)]	268	10	3.68e-28	55.67	3702643	3703449
fig|6666666.332384.peg.3696	NP_460656)(steC) type III secretion system effector SteC [SPI-2 encoded T3SS (SS021)]	325	1	0	99.08	3705615	3704638
fig|6666666.332384.peg.3698	VFG038841(gi:145297258)(flmH) 3-oxoacyl-ACP reductase [Polar flagella (CVF786)]	262	2	2.81e-15	46.69	3706617	3707405
fig|6666666.332384.peg.3701	VFG043139(gi:28901366)(scrC) sensory box/GGDEF family protein SrcC [lateral flagella (AI142)]	663	4	3.51e-83	50.97	3711014	3713005
fig|6666666.332384.peg.3714	VFG006042(gi:76788234)(cpsY) transcriptional regulator CpsY [Capsule (CVF186)]	324	1	5.83e-13	48.84	3723861	3722887
fig|6666666.332384.peg.3719	VFG038840(gi:507521851)(flmH) 3-oxoacyl-ACP reductase [Polar flagella (VF0473)]	253	10	1.07e-22	43.95	3728849	3729610
fig|6666666.332384.peg.3724	VFG026700(gi:494692156)(mbtI) anthranilate synthase component I [Mycobactin (CVF315)]	520	10	6.41e-70	46.35	3733030	3734592
fig|6666666.332384.peg.3725	VFG026347(gi:507420900)(trpD) anthranilate phosphoribosyltransferase [Tryptophan synthesis (CVF308)]	531	10	6.42e-48	51.85	3734592	3736187
fig|6666666.332384.peg.3744	VFG016532(gi:42561491)(oppF) oligopeptide ABC transporter, permease component [Capsule (CVF591)]	334	10	3.22e-43	60.03	3751118	3750114
fig|6666666.332384.peg.3745	VFG016532(gi:42561491)(oppF) oligopeptide ABC transporter, permease component [Capsule (CVF591)]	335	10	5.22e-31	50.98	3752122	3751115
fig|6666666.332384.peg.3748	VFG019366(gi:217963642)(oppA) oligopeptide ABC transporter, oligopeptide-binding protein [Oligopeptide-binding protein (CVF240)]	543	9	1.27e-61	51.18	3755731	3754100
fig|6666666.332384.peg.3750	VFG031937(gi:404410938)(lap) bifunctional aldehyde-alcohol dehydrogenase [Listeria adhesion protein (CVF228)]	381	9	3.56e-120	69.15	3757619	3758764
fig|6666666.332384.peg.3753	VFG013348(gi:148826543)(galU) carbon storage regulator [LOS (CVF494)]	302	10	9.1e-161	79.33	3761821	3760913
fig|6666666.332384.peg.3754	VFG009861(gi:15826987)(mprA) putative two-component response regulator [MprA/B (CVF333)]	337	10	7.99e-17	62.29	3763037	3762024
fig|6666666.332384.peg.3758	YP_095205)(lidL) Dot/Icm type IV secretion system effector LidL [Dot/Icm (SS047)]	509	10	5.62e-73	49.17	3768014	3766485
fig|6666666.332384.peg.3760	VFG009632(gi:41408715)(narI) NarI [Nitrate reductase (CVF318)]	225	10	5.41e-39	53.05	3768933	3768256
fig|6666666.332384.peg.3761	VFG009622(gi:145222746)(narJ) nitrate reductase molybdenum cofactor assembly chaperone [Nitrate reductase (CVF318)]	236	2	1.11e-13	46.4	3769643	3768933
fig|6666666.332384.peg.3762	VFG009606(gi:41408717)(narH) NarH [Nitrate reductase (CVF318)]	511	10	0	71.63	3771175	3769640
fig|6666666.332384.peg.3763	VFG009599(gi:119867330)(narG) nitrate reductase, alpha subunit [Nitrate reductase (CVF318)]	1247	10	0	64.19	3774915	3771172
fig|6666666.332384.peg.3764	VFG022816(gi:169630604)(narK2) integral membrane nitrite extrusion protein NarK3 [Nitrate/nitrite transporter (CVF320)]	465	1	3.27e-74	51.86	3776700	3775303
fig|6666666.332384.peg.3765	VFG009914(gi:126433710)(devS) GAF sensor signal transduction histidine kinase [DevR/S (CVF334)]	598	1	3.35e-12	49.76	3777041	3778837
fig|6666666.332384.peg.3766	VFG023572(gi:332159933)(YE105_C0309) putative two-component response regulator [TTSS (chromosomally encoded) (CVF046)]	216	10	3.72e-40	56.88	3778830	3779480
fig|6666666.332384.peg.3767	VFG021118(gi:194735650)(sinH) Aec1 [SinH (CVF016)]	509	10	2.3e-63	48.61	3781010	3779481
fig|6666666.332384.peg.3771	VFG013466(gi:68249928)(kdsA) 2-dehydro-3-deoxyphosphooctonate aldolase [LOS (CVF494)]	284	10	2.18e-178	83.19	3784020	3783166
fig|6666666.332384.peg.3776	VFG013196(gi:170717508)(hemA) Glutamyl-tRNA reductase [Heme biosynthesis (CVF506)]	418	2	5.85e-137	69.1	3788469	3787213
fig|6666666.332384.peg.3778	VFG013621(gi:148826132)(hemM) outer membrane lipoprotein LolB precursor [Heme biosynthesis (CVF506)]	207	7	2.91e-28	50.51	3788783	3789406
fig|6666666.332384.peg.3807	VFG015930(gi:70729947)(hcnC) hydrogen cyanide synthase HcnC [Hydrogen cyanide production (CVF549)]	432	1	1e-11	38.81	3816746	3815448
fig|6666666.332384.peg.3819	VFG018030(gi:157414377)(flhG) putative ATP-binding protein [Flagella (CVF397)]	270	7	1.85e-19	52.56	3825578	3826390
fig|6666666.332384.peg.3822	VFG030400(gi:333989012)(fadD13) fatty-acid--CoA ligase [MymA operon (CVF649)]	561	10	1.56e-73	46.87	3829667	3827982
fig|6666666.332384.peg.3829	VFG026700(gi:494692156)(mbtI) anthranilate synthase component I [Mycobactin (CVF315)]	454	10	1.06e-60	48.06	3833930	3835294
fig|6666666.332384.peg.3832	VFG043139(gi:28901366)(scrC) sensory box/GGDEF family protein SrcC [lateral flagella (AI142)]	474	4	1.51e-35	50.14	3837819	3839243
fig|6666666.332384.peg.3833	VFG038903(gi:330830274)(hlyA) putative transporter [Hemolysin, HlyA (CVF792)]	519	10	2.25e-26	48.15	3840824	3839265
fig|6666666.332384.peg.3846	VFG036958(gi:121635543)(farB) multidrug resistance translocase [FarAB (CVF758)]	457	10	6.11e-32	43.87	3851402	3852775
fig|6666666.332384.peg.3852	NP_797990)(VP1611) multivalent adhesion molecule MAM7 [MAM7 (VF0512)]	879	1	0	57.09	3858622	3861261
fig|6666666.332384.peg.3860	NP_460811)(sopE2) type III secretion system effector SopE2, guanine nucleotide exchange factor [TTSS(SPI-1 encode) (VF0116)]	154	10	1.52e-110	96.25	3865239	3864775
fig|6666666.332384.peg.3864	VFG042228(gi:82470754)(ABB77406) unknown [T3SS (SS007)]	58	1	1.44e-13	69.23	3867928	3867752
fig|6666666.332384.peg.3912	VFG020187(gi:187734408)(msbB2) lipid A biosynthesis (KDO)2-(lauroyl)-lipid IVA acyltransferase [MsbB2 (CVF484)]	323	10	7.31e-168	69.45	3904245	3903274
fig|6666666.332384.peg.3913	VFG042906(gi:283788198)(cfcV) prepillin peptidase [colonization factor Citrobacter (CFC) type IV fimbriae (AI116)]	439	1	2.13e-24	57.36	3905681	3904362
fig|6666666.332384.peg.3914	VFG005227(gi:19746909)(lmb) putative laminin adhesion [Laminin-binding protein (CVF114)]	314	10	4.03e-22	44.39	3906641	3905697
fig|6666666.332384.peg.3915	VFG044077(gi:218563205)(chuC) putative hemin uptake system ATP-binding protein [direct heme uptake system (IA056)]	251	10	1.12e-33	49.71	3906720	3907475
fig|6666666.332384.peg.3916	VFG037068(gi:194097803)(mntB) membrane protein [Manganese transport system (CVF761)]	261	10	3.64e-18	51.92	3907472	3908257
fig|6666666.332384.peg.3922	VFG039532(gi:212212082)(CbuG_0446) hypothetical protein [T4SS effectors (CVF803)]	246	1	4.21e-106	76.54	3913126	3912386
fig|6666666.332384.peg.3936	VFG043033(gi:16765254)(flhE) flagellar protein [peritrichous flagella (AI139)]	130	6	5.57e-93	71.14	3926803	3926411
fig|6666666.332384.peg.3937	VFG043034(gi:16765255)(flhA) flagellar biosynthesis protein FlhA [peritrichous flagella (AI139)]	692	10	0	93.65	3928881	3926803
fig|6666666.332384.peg.3938	VFG043035(gi:16765256)(flhB) flagellar biosynthesis protein FlhB [peritrichous flagella (AI139)]	383	10	0	82.42	3930025	3928874
fig|6666666.332384.peg.3939	VFG043036(gi:16765257)(cheZ) chemotaxis regulator CheZ [peritrichous flagella (AI139)]	214	10	1.22e-155	75.64	3930863	3930219
fig|6666666.332384.peg.3940	VFG043037(gi:16765258)(cheY) chemotaxis regulatory protein CheY [peritrichous flagella (AI139)]	129	10	1.05e-90	91.59	3931263	3930874
fig|6666666.332384.peg.3941	VFG043038(gi:16765259)(cheB) chemotaxis-specific methylesterase [peritrichous flagella (AI139)]	349	10	0	82.38	3932330	3931281
fig|6666666.332384.peg.3942	VFG043039(gi:16765260)(cheR) chemotaxis methyltransferase CheR [peritrichous flagella (AI139)]	288	10	0	79.34	3933193	3932327
fig|6666666.332384.peg.3943	VFG043040(gi:16765261)(tar/cheM) methyl accepting chemotaxis protein II [peritrichous flagella (AI139)]	553	10	0	77.93	3935015	3933354
fig|6666666.332384.peg.3945	VFG043041(gi:16765262)(cheW) purine-binding chemotaxis protein [peritrichous flagella (AI139)]	167	10	5.04e-119	83.88	3935755	3935252
fig|6666666.332384.peg.3946	VFG043042(gi:16765263)(cheA) chemotaxis protein CheA [peritrichous flagella (AI139)]	669	10	0	74.57	3937785	3935776
fig|6666666.332384.peg.3947	VFG043043(gi:16765264)(motB) flagellar motor protein MotB [peritrichous flagella (AI139)]	309	10	0	74.05	3938725	3937796
fig|6666666.332384.peg.3948	VFG043044(gi:16765265)(motA) flagellar motor protein MotA [peritrichous flagella (AI139)]	295	10	0	85.29	3939609	3938722
fig|6666666.332384.peg.3949	VFG043045(gi:39546332)(flhC) transcriptional activator FlhC [peritrichous flagella (AI139)]	194	8	1.21e-143	84.87	3940318	3939734
fig|6666666.332384.peg.3950	VFG043046(gi:16765267)(flhD) transcriptional activator FlhD [peritrichous flagella (AI139)]	113	9	2.12e-80	82.16	3940656	3940315
fig|6666666.332384.peg.3953	VFG042019(gi:17548952)(RSp0731) trehalose-6-phosphate synthase [T3SS (SS008)]	473	1	5.64e-109	58.94	3943319	3941898
fig|6666666.332384.peg.3969	VFG015080(gi:15597782)(gacA) response regulator GacA [GacS/GacA two-component system (CVF529)]	218	10	8.01e-94	76.04	3957386	3956730
fig|6666666.332384.peg.3972	VFG000152(gi:15598673)(rhlR) transcriptional regulator RhlR [Quorum sensing (VF0093)]	240	10	6.88e-65	54.19	3958863	3958141
fig|6666666.332384.peg.3973	VFG013192(gi:170717476)(hitC) ABC transporter related [Haemophilus iron transport locus (CVF501)]	250	10	1.86e-46	56.32	3959846	3959094
fig|6666666.332384.peg.3974	VFG002901(gi:108808062)(YPA_2067) histidine transport system permease protein HisQ [O-antigen (CVF043)]	222	1	3.01e-24	49.78	3960511	3959843
fig|6666666.332384.peg.3976	VFG043047(gi:16765292)(fliY) cystine transporter subunit [peritrichous flagella (AI139)]	266	4	0	77.38	3962472	3961672
fig|6666666.332384.peg.3977	VFG043048(gi:16765293)(fliZ) flagella biosynthesis protein FliZ [peritrichous flagella (AI139)]	173	4	3.11e-129	79.92	3963140	3962619
fig|6666666.332384.peg.3978	VFG043049(gi:16765294)(fliA) flagellar biosynthesis sigma factor [peritrichous flagella (AI139)]	229	10	1.17e-166	84.79	3963918	3963229
fig|6666666.332384.peg.3979	VFG043050(gi:16765296)(fliB) lysine-N-methylase [peritrichous flagella (AI139)]	262	3	0	66.93	3964933	3964145
fig|6666666.332384.peg.3980	VFG043050(gi:16765296)(fliB) lysine-N-methylase [peritrichous flagella (AI139)]	91	7	3.85e-60	72.54	3965350	3965075
fig|6666666.332384.peg.3981	VFG043071(gi:16766083)(fljB) flagellin [peritrichous flagella (AI139)]	362	10	5.42e-114	73.51	3966517	3965429
fig|6666666.332384.peg.4007	VFG043052(gi:16765298)(fliD) flagellar capping protein [peritrichous flagella (AI139)]	467	10	0	66.13	3989484	3990887
fig|6666666.332384.peg.4008	VFG043053(gi:16765299)(fliS) flagellar protein FliS [peritrichous flagella (AI139)]	135	10	7.28e-96	78.85	3990902	3991309
fig|6666666.332384.peg.4009	VFG043054(gi:16765300)(fliT) flagellar biosynthesis protein FliT [peritrichous flagella (AI139)]	122	9	1.02e-84	66.78	3991309	3991677
fig|6666666.332384.peg.4015	VFG043055(gi:16765306)(fliE) flagellar hook-basal body protein FliE [peritrichous flagella (AI139)]	104	10	6.21e-71	76.3	3996393	3996079
fig|6666666.332384.peg.4017	VFG043056(gi:16765307)(fliF) flagellar MS-ring protein [peritrichous flagella (AI139)]	531	10	0	79.95	3996697	3998292
fig|6666666.332384.peg.4018	VFG043057(gi:16765308)(fliG) flagellar motor switch protein G [peritrichous flagella (AI139)]	331	10	0	87.12	3998285	3999280
fig|6666666.332384.peg.4019	VFG043058(gi:16765309)(fliH) flagellar assembly protein H [peritrichous flagella (AI139)]	235	10	1.66e-171	74.93	3999273	3999980
fig|6666666.332384.peg.4020	VFG043059(gi:16765310)(fliI) flagellum-specific ATP synthase [peritrichous flagella (AI139)]	456	10	0	90.13	3999980	4001350
fig|6666666.332384.peg.4021	VFG043060(gi:16765311)(fliJ) flagellar biosynthesis chaperone [peritrichous flagella (AI139)]	147	10	1.19e-105	68.72	4001372	4001815
fig|6666666.332384.peg.4022	VFG043061(gi:16765312)(fliK) flagellar hook-length control protein [peritrichous flagella (AI139)]	405	10	0	67.51	4001812	4003029
fig|6666666.332384.peg.4023	VFG043062(gi:16765313)(fliL) flagellar basal body-associated protein FliL [peritrichous flagella (AI139)]	155	10	1.25e-111	73.38	4003134	4003601
fig|6666666.332384.peg.4024	VFG043063(gi:16765314)(fliM) flagellar motor switch protein FliM [peritrichous flagella (AI139)]	334	10	0	83.13	4003606	4004610
fig|6666666.332384.peg.4025	VFG043064(gi:16765315)(fliN) flagellar motor switch protein FliN [peritrichous flagella (AI139)]	137	10	2.45e-96	86.27	4004607	4005020
fig|6666666.332384.peg.4026	VFG043065(gi:308065961)(fliO) flagellar biosynthesis protein FliO [peritrichous flagella (AI139)]	106	10	1.44e-72	68.11	4005077	4005397
fig|6666666.332384.peg.4027	VFG043066(gi:16765317)(fliP) flagellar biosynthesis protein FliP [peritrichous flagella (AI139)]	245	10	9.21e-173	89.93	4005397	4006134
fig|6666666.332384.peg.4028	VFG043067(gi:16765318)(fliQ) flagellar biosynthesis protein FliQ [peritrichous flagella (AI139)]	89	10	1.13e-57	83.23	4006144	4006413
fig|6666666.332384.peg.4029	VFG043068(gi:16765319)(fliR) flagellar biosynthesis protein FliR [peritrichous flagella (AI139)]	264	10	0	81.85	4006422	4007216
fig|6666666.332384.peg.4034	VFG043139(gi:28901366)(scrC) sensory box/GGDEF family protein SrcC [lateral flagella (AI142)]	570	1	9.26e-17	50.59	4011526	4009814
fig|6666666.332384.peg.4042	VFG043568(gi:16764916)(ompD) outer membrane porin precursor [Hek (AI384)]	392	1	1.53e-162	73.48	4017640	4018818
fig|6666666.332384.peg.4054	YP_096234)(lpnE) Dot/Icm type IV secretion system effector LpnE [Dot/Icm (SS047)]	722	10	1.16e-20	53.58	4025513	4027681
fig|6666666.332384.peg.4076	VFG044173(gi:28901507)(pvuE) iron-dicitrate transporter ATP-binding subunit [vibrioferrin (IA038)]	271	10	1.47e-28	50.25	4045486	4044671
fig|6666666.332384.peg.4107	VFG031960(gi:347549024)(lap) putative alcohol-acetaldehyde dehydrogenase [Listeria adhesion protein (CVF228)]	464	9	6.16e-42	48.32	4069699	4071093
fig|6666666.332384.peg.4108	VFG031960(gi:347549024)(lap) putative alcohol-acetaldehyde dehydrogenase [Listeria adhesion protein (CVF228)]	370	10	3.52e-75	54.37	4071105	4072217
fig|6666666.332384.peg.4118	VFG038250(gi:126640330)(pbpG) D-alanyl-D-alanine endopeptidase [PbpG (CVF779)]	390	8	6.4e-19	48.56	4080673	4079501
fig|6666666.332384.peg.4120	VFG022803(gi:333989790)(narH) NarH [Nitrate reductase (CVF318)]	192	10	1.64e-17	56.05	4082136	4081558
fig|6666666.332384.peg.4122	NP_461011)(sopA) type III secretion system effector SopA, E3 ubiquitin ligase [TTSS(SPI-1 encode) (VF0116)]	308	8	0	98.44	4085046	4085972
fig|6666666.332384.peg.4123	VFG020638(gi:197247408)(sopA) secreted effector protein [TTSS-1 translocated effectors (CVF034)]	441	10	0	89.52	4086073	4087398
fig|6666666.332384.peg.4129	VFG014101(gi:15598353)(PA3157) probable acetyltransferase [LPS O-antigen (P. aeruginosa) (CVF520)]	377	1	4.74e-11	43.64	4089887	4091020
fig|6666666.332384.peg.4186	NP_282578)(Cj1437c) aminotransferase [Capsule (VF0323)]	359	2	4.82e-28	46.43	4136594	4137673
fig|6666666.332384.peg.4187	VFG011816(gi:118475458)(CFF8240_1415) D,D-heptose 1,7-bisphosphate phosphatase [LOS (CVF396)]	355	8	3.48e-21	48.87	4137670	4138737
fig|6666666.332384.peg.4188	VFG014106(gi:15598348)(hisH2) glutamine amidotransferase [LPS O-antigen (P. aeruginosa) (CVF520)]	196	2	2.72e-20	53.91	4138737	4139327
fig|6666666.332384.peg.4189	VFG045297(gi:52840986)(hisF) imidazole glycerol phosphate synthase subunit HisF [LPS (VF0171)]	245	2	2e-19	48.19	4139347	4140084
fig|6666666.332384.peg.4190	VFG045297(gi:52840986)(hisF) imidazole glycerol phosphate synthase subunit HisF [LPS (VF0171)]	258	3	2.09e-53	57.68	4140066	4140842
fig|6666666.332384.peg.4192	VFG023778(gi:332159797)(YE105_C0173) lipopolysaccharide biosynthesis protein WzzE [O-antigen (CVF043)]	325	2	1.1e-25	46.61	4142505	4141528
fig|6666666.332384.peg.4193	VFG007656(gi:27364223)(wbfV/wcvB) Predicted UDP-glucose 6-dehydrogenase [Capsular polysaccharide (CVF282)]	388	10	0	75.88	4143820	4142654
fig|6666666.332384.peg.4195	VFG013366(gi:148826483)(wbaP/rfbP) undecaprenyl-phosphate galactosephosphotransferase [LOS (CVF494)]	476	10	0	64.75	4147057	4145627
fig|6666666.332384.peg.4196	VFG011469(gi:148559635)(pmm) putative phosphomannomutase [LPS (CVF383)]	477	10	5.97e-110	58.3	4148562	4147129
fig|6666666.332384.peg.4197	VFG023783(gi:332161122)(YE105_C1500) Mannose-1-phosphate guanylytransferase, ManC protein [O-antigen (CVF043)]	479	10	0	72.48	4149988	4148549
fig|6666666.332384.peg.4199	VFG016427(gi:118480311)(BALH_4772) possible mannosyltransferase [Polysaccharide capsule (CVF567)]	353	8	1.24e-23	48.37	4151995	4150934
fig|6666666.332384.peg.4200	YP_001007265)(wbcC) glycosyltransferase [O-antigen (VF0392)]	333	3	8.05e-91	56.31	4153317	4152316
fig|6666666.332384.peg.4201	VFG019025(gi:170025403)(YPK_3186) LPS side chain defect: putative O-antigen transferase [O-antigen (CVF043)]	430	1	1.32e-102	62.18	4154614	4153322
fig|6666666.332384.peg.4202	VFG002701(gi:16123278)(prt) paratose synthase [O-antigen (CVF043)]	299	4	6.67e-36	49.39	4155595	4154696
fig|6666666.332384.peg.4203	VFG003394(gi:51595351)(ddhC) putative CDP-4-keto-6-deoxy-D-glucose-3-dehydratase [O-antigen (CVF043)]	437	10	0	69.47	4156936	4155623
fig|6666666.332384.peg.4204	VFG019029(gi:170025407)(YPK_3190) CDP-glucose 4,6-dehydratase [O-antigen (CVF043)]	359	10	0	80.23	4158042	4156963
fig|6666666.332384.peg.4205	VFG017360(gi:153950020)(ddhA) glucose-1-phosphate cytidylyltransferase [O-antigen (CVF043)]	257	10	3.49e-163	62.97	4158820	4158047
fig|6666666.332384.peg.4206	VFG003391(gi:51595348)(ddhD) CDP-6-deoxy-delta-3,4-glucoseen reductase [O-antigen (CVF043)]	330	2	9.4e-118	67.68	4159809	4158817
fig|6666666.332384.peg.4207	VFG007663(gi:37678487)(rmlC) dTDP-6-deoxy-D-xylo-4-hexulose-3,5-epimerase [Capsular polysaccharide (CVF282)]	182	9	4.28e-81	59.59	4160363	4159815
fig|6666666.332384.peg.4208	VFG005997(gi:24379858)(rmlA) putative glucose-1-phosphate thymidyltransferase [Capsule (CVF186)]	294	10	1.67e-150	83.57	4161251	4160367
fig|6666666.332384.peg.4209	VFG007662(gi:37678486)(rmlD) dTDP-4-dehydrorhamnose reductase [Capsular polysaccharide (CVF282)]	299	7	1.28e-65	52.9	4162192	4161293
fig|6666666.332384.peg.4210	VFG007659(gi:59710773)(rmlB) dTDP-glucose 4,6-dehydratase [Capsular polysaccharide (CVF282)]	361	10	0	77.94	4163277	4162192
fig|6666666.332384.peg.4211	VFG013348(gi:148826543)(galU) carbon storage regulator [LOS (CVF494)]	297	10	1.06e-117	71.76	4164547	4163654
fig|6666666.332384.peg.4213	VFG016376(gi:30023301)(BC5269) Amylovoran biosynthesis AmsK [Polysaccharide capsule (CVF567)]	406	3	4.86e-15	51.09	4167359	4166139
fig|6666666.332384.peg.4216	VFG007668(gi:27367928)(cpsA) Sugar transferase involved in lipopolysaccharide synthesis [Capsular polysaccharide (CVF282)]	464	10	5.66e-144	56.78	4171632	4170238
fig|6666666.332384.peg.4217	VFG019017(gi:170025395)(YPK_3178) Phosphomannomutase [O-antigen (CVF043)]	456	10	0	82.38	4173056	4171686
fig|6666666.332384.peg.4218	VFG023783(gi:332161122)(YE105_C1500) Mannose-1-phosphate guanylytransferase, ManC protein [O-antigen (CVF043)]	478	10	0	74.42	4174603	4173167
fig|6666666.332384.peg.4219	VFG014132(gi:152985544)(PSPA7_1983) glycosyltransferase [LPS O-antigen (P. aeruginosa) (CVF520)]	407	2	4.22e-26	43.6	4175829	4174606
fig|6666666.332384.peg.4221	VFG002764(gi:22124985)(wcaG) nucleotide di-P-sugar epimerase or dehydratase [O-antigen (CVF043)]	321	10	0	70.81	4177267	4176302
fig|6666666.332384.peg.4222	VFG023786(gi:332161126)(YE105_C1504) GDP-mannose 4,6-dehydratase [O-antigen (CVF043)]	373	10	0	83.6	4178391	4177270
fig|6666666.332384.peg.4224	VFG017347(gi:153949638)(YpsIP31758_3038) glycosyl transferase, group 2 family protein [O-antigen (CVF043)]	248	10	1.51e-17	45.84	4179731	4178985
fig|6666666.332384.peg.4227	VFG005975(gi:55821115)(eps4) exopolysaccharide biosynthesis protein [Capsule (CVF186)]	162	2	1.34e-20	56.81	4182635	4182147
fig|6666666.332384.peg.4228	VFG016398(gi:42784437)(BCE_5392) glycosyl transferase, group 2 family protein [Polysaccharide capsule (CVF567)]	280	9	1.52e-18	51.21	4183480	4182638
fig|6666666.332384.peg.4229	VFG007630(gi:37678524)(wzc) putative tyrosine-protein kinase Wzc [Capsular polysaccharide (CVF282)]	719	10	0	61.77	4185726	4183567
fig|6666666.332384.peg.4230	VFG007628(gi:59710771)(wzb) Protein tyrosine phosphatase [Capsular polysaccharide (CVF282)]	149	10	5.3e-58	60.65	4186172	4185723
fig|6666666.332384.peg.4231	VFG007622(gi:27364235)(wza) Periplasmic protein involved in capsular polysaccharide export [Capsular polysaccharide (CVF282)]	348	10	3.58e-150	61.93	4187224	4186178
fig|6666666.332384.peg.4233	VFG038900(gi:117619797)(hlyA) transporter [Hemolysin, HlyA (CVF792)]	526	3	2.02e-29	53.25	4187992	4189572
fig|6666666.332384.peg.4238	VFG043139(gi:28901366)(scrC) sensory box/GGDEF family protein SrcC [lateral flagella (AI142)]	998	1	2.25e-30	46.03	4193191	4196187
fig|6666666.332384.peg.4242	VFG037709(gi:523531827)(adeF) Membrane-fusion protein [AdeFGH efflux pump/transport autoinducer (CVF773)]	412	10	3.57e-50	52.98	4198951	4200189
fig|6666666.332384.peg.4243	VFG037718(gi:213158705)(adeG) RND family efflux transporter [AdeFGH efflux pump/transport autoinducer (CVF773)]	1040	10	2.88e-121	49.96	4200189	4203311
fig|6666666.332384.peg.4244	VFG037718(gi:213158705)(adeG) RND family efflux transporter [AdeFGH efflux pump/transport autoinducer (CVF773)]	1026	10	2.8e-107	49.32	4203312	4206392
fig|6666666.332384.peg.4245	VFG036963(gi:254805645)(farB) putative efflux pump protein [FarAB (CVF758)]	470	10	7.42e-34	50.46	4206389	4207801
fig|6666666.332384.peg.4246	VFG006833(gi:116872810)(lisK) two-component sensor histidine kinase [LisR/LisK (CVF253)]	467	10	2.86e-32	48.28	4207801	4209204
fig|6666666.332384.peg.4247	VFG031738(gi:169631126)(regX3) Sensory transduction protein RegX3 [RegX3 (CVF667)]	240	10	4.62e-52	58.46	4209201	4209923
fig|6666666.332384.peg.4252	NP_290260)(cesT) multieffector chaperone [LEE encoded T3SS (SS020)]	89	5	6.69e-36	81.8	4216617	4216348
fig|6666666.332384.peg.4264	VFG004260(gi:16765478)(stcD) putative outer membrane lipoprotein [Stc (AI060)]	335	8	0	77.41	4227609	4226602
fig|6666666.332384.peg.4265	VFG004266(gi:16761092)(stcC) putative outer membrane usher protein [Stc (CVF021)]	829	10	0	89.95	4230114	4227625
fig|6666666.332384.peg.4266	VFG004271(gi:16761093)(stcB) putative fimbrial chaperone protein [Stc (CVF021)]	227	10	4.73e-167	85.81	4230811	4230128
fig|6666666.332384.peg.4267	VFG004275(gi:16765481)(stcA) putative fimbrial-like protein [Stc (AI060)]	176	8	8.32e-129	81.41	4231397	4230867
fig|6666666.332384.peg.4269	YP_095809)(fleN) flagellar synthesis regulator FleN [polar flagella (AI149)]	369	1	5.66e-17	47.01	4233344	4232235
fig|6666666.332384.peg.4274	VFG014966(gi:28867367)(algR) alginate biosynthesis regulatory protein AlgR [Alginate regulation (CVF523)]	239	10	3.08e-26	50.45	4238232	4237513
fig|6666666.332384.peg.4275	VFG014983(gi:146280917)(algZ) alginate biosynthesis protein AlgZ/FimS [Alginate regulation (CVF523)]	561	7	6.49e-26	52.32	4239914	4238229
fig|6666666.332384.peg.4278	VFG030700(gi:507420313)(sugC) sugar ABC transporter ATP-binding protein SugC [Trehalose-recycling ABC transporter (CVF651)]	315	10	3.73e-53	55.67	4242678	4241731
fig|6666666.332384.peg.4283	VFG038250(gi:126640330)(pbpG) D-alanyl-D-alanine endopeptidase [PbpG (CVF779)]	313	9	4e-59	60.88	4250236	4249295
fig|6666666.332384.peg.4286	VFG038841(gi:145297258)(flmH) 3-oxoacyl-ACP reductase [Polar flagella (CVF786)]	253	10	4.15e-32	50.49	4252527	4251766
fig|6666666.332384.peg.4287	VFG037745(gi:407933448)(adeH) NodT family efflux transporter outer membrane lipoprotein [AdeFGH efflux pump/transport autoinducer (CVF773)]	478	10	3e-29	46.79	4254029	4252593
fig|6666666.332384.peg.4291	VFG015549(gi:152983731)(phzS) probable FAD-dependent monooxygenase [Phenazines biosynthesis (CVF536)]	397	3	7.61e-32	45.15	4256728	4255535
fig|6666666.332384.peg.4295	VFG044370(gi:33521628)(qbsN) QbsN [thioquinolobactin (IA009)]	452	1	1.56e-35	47.14	4260520	4259162
fig|6666666.332384.peg.4305	VFG021792(gi:300858408)(ciuD) iron ABC transporter ATP-binding protein [ciu iron uptake and siderophore biosynthesis system (CVF515)]	506	10	3.16e-20	49.61	4270248	4268728
fig|6666666.332384.peg.4307	VFG045671(gi:529233057)(EFAU085_00344) LacI family sugar-binding transcriptional regulator [BopD (CVF615)]	340	4	2.52e-19	47.64	4272741	4271719
fig|6666666.332384.peg.4309	VFG041115(gi:53717514)(folE) GTP cyclohydrolase I [TSS-1 (SS191)]	222	1	3.05e-15	43.59	4274716	4274048
fig|6666666.332384.peg.4314	VFG032167(gi:386053104)(hpt) sugar phosphate transporter [Sugar-uptake system (CVF237)]	440	10	4.97e-42	49.54	4278790	4280112
fig|6666666.332384.peg.4315	VFG007263(gi:15640502)(irgA) iron-regulated outer membrane virulence protein, TonB receptor family [Enterobactin receptors (CVF277)]	650	10	8.38e-122	50.45	4282108	4280156
fig|6666666.332384.peg.4334	VFG006734(gi:16799666)(iap/cwhA) P60 extracellular protein, invasion associated protein Iap [Cell wall hydrolase (CVF234)]	147	10	2.58e-11	52.04	4297392	4297835
fig|6666666.332384.peg.4335	YP_107884)(cdpA) cyclic di-GMP phosphodiesterase [CdpA (VF0432)]	518	3	3.89e-30	49.68	4298161	4299717
fig|6666666.332384.peg.4339	VFG007024(gi:147675369)(rtxB) RtxB protein [RTX toxin (CVF263)]	529	10	3.59e-27	52.74	4303760	4305349
fig|6666666.332384.peg.4341	VFG044123(gi:33593445)(alcS) putative drug resistance translocase [alcaligin (IA010)]	396	4	1.33e-36	49	4307278	4306088
fig|6666666.332384.peg.4351	VFG014101(gi:15598353)(PA3157) probable acetyltransferase [LPS O-antigen (P. aeruginosa) (CVF520)]	466	1	2.61e-20	45.68	4316157	4317557
fig|6666666.332384.peg.4358	VFG041575(gi:269138242)(esrB) two-component response regulator EsrB, LuxR family [T3SS (SS025)]	215	10	1.6e-33	56.01	4322314	4322961
fig|6666666.332384.peg.4368	VFG016026(gi:26990908)(pvdE) pyoverdine ABC export system, permease/ATP-binding protein [Pyoverdine (CVF551)]	547	10	1.49e-99	54.34	4331788	4330145
fig|6666666.332384.peg.4372	VFG043568(gi:16764916)(ompD) outer membrane porin precursor [Hek (AI384)]	378	2	4.39e-157	58.1	4335962	4334826
fig|6666666.332384.peg.4374	VFG042668(gi:206564594)(cblR) two-component regulatory system response regulator protein [cable pilus (AI081)]	216	1	8.8e-28	49.78	4339377	4340027
fig|6666666.332384.peg.4376	VFG015070(gi:28868897)(gacS) sensor histidine kinase/response regulator GacS [GacS/GacA two-component system (CVF529)]	948	10	3.04e-65	49.85	4342976	4340130
fig|6666666.332384.peg.4384	VFG003391(gi:51595348)(ddhD) CDP-6-deoxy-delta-3,4-glucoseen reductase [O-antigen (CVF043)]	84	2	1.91e-12	67.65	4354304	4354558
fig|6666666.332384.peg.4388	VFG032174(gi:289434103)(hpt) hexose phosphate transport protein [Sugar-uptake system (CVF237)]	452	10	9e-48	47.28	4359339	4357981
fig|6666666.332384.peg.4389	VFG015928(gi:116050128)(hcnC) hydrogen cyanide synthase HcnC [Hydrogen cyanide production (CVF549)]	542	3	6.34e-14	50.51	4359612	4361240
fig|6666666.332384.peg.4392	VFG020968(gi:194448042)(sseL) deubiquitinase [TTSS-2 translocated effectors (CVF035)]	340	10	0	96.9	4364102	4365124
fig|6666666.332384.peg.4394	VFG044353(gi:307130376)(acsB) 2,4-dihydroxyhept-2-ene-1,7-dioic acid aldolase [achromobactin (IA011)]	267	4	2.06e-27	49.53	4366219	4365416
fig|6666666.332384.peg.4401	VFG042525(gi:3372509)(afrS) transcriptional activator precursor AfrS [adhesive factor/rabbit 1 (AF/R1) pili (AI035)]	201	1	2.49e-45	65.19	4373048	4372443
fig|6666666.332384.peg.4402	VFG011158(gi:115421195)(bplF) lipopolysaccharide biosynthesis protein [LPS (CVF380)]	379	10	3.48e-104	57.09	4373347	4374486
fig|6666666.332384.peg.4403	NP_706258)(gtrB) bactoprenol glucosyl transferase [LPS (VF0124)]	327	2	4.11e-46	52.29	4374489	4375472
fig|6666666.332384.peg.4404	VFG021856(gi:118470693)(fxbA) Formyl transferase [exochelin (IA032)]	660	8	8.43e-38	50.54	4375469	4377451
fig|6666666.332384.peg.4410	VFG030402(gi:315442419)(fadD13) acyl-CoA synthetase [MymA operon (CVF649)]	455	10	8.76e-28	41.51	4382416	4381049
fig|6666666.332384.peg.4415	VFG016150(gi:70730850)(pchA) salicylate biosynthesis isochorismate synthase [Pyochelin (CVF553)]	431	10	1.02e-40	49.75	4388053	4386758
fig|6666666.332384.peg.4420	VFG038817(gi:145298486)(cheV) two-component system chemotaxis response regulator CheV [Polar flagella (CVF786)]	333	10	6.3e-62	56.46	4390019	4391020
fig|6666666.332384.peg.4430	VFG024122(gi:406032156)(nuoG) NADH-quinone oxidoreductase subunit G [NuoG (CVF620)]	908	10	2.65e-46	44.44	4404113	4401387
fig|6666666.332384.peg.4453	VFG045670(gi:383327725)(EFAU004_00405) LacI family transcriptional regulator [BopD (CVF615)]	339	2	1.71e-22	44.59	4426876	4427895
fig|6666666.332384.peg.4459	VFG006259(gi:59800668)(fbpC) ABC transporter, ATP-binding protein, iron related [ABC transporter (CVF197)]	258	10	4.34e-36	53.5	4432400	4431624
fig|6666666.332384.peg.4460	VFG002901(gi:108808062)(YPA_2067) histidine transport system permease protein HisQ [O-antigen (CVF043)]	235	1	4.56e-26	51.8	4433118	4432411
fig|6666666.332384.peg.4461	VFG002901(gi:108808062)(YPA_2067) histidine transport system permease protein HisQ [O-antigen (CVF043)]	228	1	1.34e-125	87.72	4433801	4433115
fig|6666666.332384.peg.4462	VFG043047(gi:16765292)(fliY) cystine transporter subunit [peritrichous flagella (AI139)]	260	3	3.01e-33	52.5	4434764	4433982
fig|6666666.332384.peg.4463	VFG043047(gi:16765292)(fliY) cystine transporter subunit [peritrichous flagella (AI139)]	260	3	1.66e-31	53.07	4435784	4435002
fig|6666666.332384.peg.4467	VFG044274(gi:151222291)(sfaC) hypothetical protein [staphyloferrin A (IA026)]	367	1	8.45e-33	46.98	4439242	4438139
fig|6666666.332384.peg.4469	VFG044261(gi:151220279)(sbnH) diaminopimelate decarboxylase [staphyloferrin B (IA027)]	465	1	2.52e-15	40.2	4442153	4440756
fig|6666666.332384.peg.4470	VFG038862(gi:145297442)(lafK) two-component system lateral flagellar response regulator [Lateral flagella (VF0474)]	475	10	1.67e-67	58.19	4442364	4443791
fig|6666666.332384.peg.4481	VFG043069(gi:16765698)(flk) flagella biosynthesis regulator [peritrichous flagella (AI139)]	333	2	0	88.66	4453086	4454087
fig|6666666.332384.peg.4488	VFG009243(gi:118467655)(kasB) 3-oxoacyl-[acyl-carrier-protein] synthase 2 [FAS-II (CVF300)]	404	10	1.29e-56	52.16	4459327	4458113
fig|6666666.332384.peg.4498	VFG017683(gi:386003509)(icl) isocitrate lyase [Isocitrate lyase (CVF302)]	715	2	9.39e-38	54.16	4469743	4467596
fig|6666666.332384.peg.4504	VFG003087(gi:45478719)(pla) plasminogen activator [Pla (CVF044)]	77	6	1.31e-35	71.53	4475779	4475546
fig|6666666.332384.peg.4505	VFG003087(gi:45478719)(pla) plasminogen activator [Pla (CVF044)]	67	10	6.97e-28	72.06	4475939	4475736
fig|6666666.332384.peg.4506	NP_395233)(pla) plasminogen activator protease precursor [Pla (VF0139)]	173	10	4.02e-83	67.57	4476485	4475964
fig|6666666.332384.peg.4507	VFG015680(gi:167034927)(fleR) two component, sigma54 specific, transcriptional regulator, Fis family [Flagella (CVF521)]	415	10	6.5e-42	43.59	4478000	4476753
fig|6666666.332384.peg.4508	VFG042740(gi:15599489)(pprA) two-component sensor PprA [type IV pili (AI098)]	668	10	7.36e-19	47.53	4479996	4477990
fig|6666666.332384.peg.4511	VFG032174(gi:289434103)(hpt) hexose phosphate transport protein [Sugar-uptake system (CVF237)]	463	10	1.06e-57	49.93	4481622	4483013
fig|6666666.332384.peg.4514	VFG013437(gi:68249956)(htrB) lipid A biosynthesis lauroyl acyltransferase [LOS (CVF494)]	306	10	5.68e-102	62.53	4484053	4484973
fig|6666666.332384.peg.4526	VFG043139(gi:28901366)(scrC) sensory box/GGDEF family protein SrcC [lateral flagella (AI142)]	729	3	1.61e-23	46.21	4498241	4496052
fig|6666666.332384.peg.4539	VFG043491(gi:24216818)(ligA) NAD dependent DNA ligase [Fibronectin-binding protein (AI240)]	671	1	1.09e-115	52.97	4510270	4508255
fig|6666666.332384.peg.4542	VFG044254(gi:151220272)(sbnA) O-Acetyl serine sulfhydrylase [staphyloferrin B (IA027)]	323	2	3.71e-39	50.34	4512633	4513604
fig|6666666.332384.peg.4554	VFG044254(gi:151220272)(sbnA) O-Acetyl serine sulfhydrylase [staphyloferrin B (IA027)]	303	2	1.65e-42	52.74	4521965	4521054
fig|6666666.332384.peg.4556	VFG013192(gi:170717476)(hitC) ABC transporter related [Haemophilus iron transport locus (CVF501)]	364	10	3.61e-65	59.28	4523180	4522086
fig|6666666.332384.peg.4558	VFG019712(gi:194097928)(fbpB) ABC transporter, permease protein, iron related [ABC transporter (CVF197)]	277	10	4.34e-18	47.34	4524878	4524045
fig|6666666.332384.peg.4560	VFG038840(gi:507521851)(flmH) 3-oxoacyl-ACP reductase [Polar flagella (VF0473)]	263	10	2.37e-46	52.63	4526843	4526052
fig|6666666.332384.peg.4575	VFG019346(gi:217964213)(lap) bifunctional acetaldehyde-CoA/alcohol dehydrogenase [Listeria adhesion protein (CVF228)]	395	10	6.55e-51	49.8	4541014	4539827
fig|6666666.332384.peg.4577	VFG019346(gi:217964213)(lap) bifunctional acetaldehyde-CoA/alcohol dehydrogenase [Listeria adhesion protein (CVF228)]	467	9	2.1e-47	49.45	4543257	4541854
fig|6666666.332384.peg.4593	VFG009914(gi:126433710)(devS) GAF sensor signal transduction histidine kinase [DevR/S (CVF334)]	566	8	7e-14	46.65	4559419	4561119
fig|6666666.332384.peg.4594	VFG036998(gi:385323678)(mtrD) drug efflux transport protein MtrD [MtrCDE (CVF759)]	1037	10	0	65.23	4561304	4564417
fig|6666666.332384.peg.4600	VFG007789(gi:507419602)(purC) phosphoribosylaminoimidazole-succinocarboxamide synthase [Purine synthesis (CVF306)]	237	5	1.28e-13	46.86	4570474	4569761
fig|6666666.332384.peg.4615	VFG042931(gi:146329004)(ppk) polyphosphate kinase [type IV pili (AI117)]	688	1	9.17e-115	55.4	4582593	4584659
fig|6666666.332384.peg.4617	YP_107884)(cdpA) cyclic di-GMP phosphodiesterase [CdpA (VF0432)]	737	4	6.27e-27	49.14	4588454	4586241
fig|6666666.332384.peg.4625	VFG021105(gi:207857923)(shdA) host colonisation factor (ShdA) [ShdA (CVF015)]	1931	10	0	70.84	4602194	4596399
fig|6666666.332384.peg.4626	VFG004448(gi:62181081)(ratB) putative outer membrane protein [RatB (CVF011)]	2435	9	0	77.68	4610204	4602897
fig|6666666.332384.peg.4627	VFG021126(gi:194442726)(ratB) RatB [RatB (CVF011)]	869	9	0	71.35	4612979	4610370
fig|6666666.332384.peg.4628	VFG021126(gi:194442726)(ratB) RatB [RatB (CVF011)]	961	9	0	79.38	4615949	4613064
fig|6666666.332384.peg.4629	VFG021117(gi:194446246)(sinH) Aec1 [SinH (CVF016)]	319	7	1.95e-13	50.63	4617046	4616087
fig|6666666.332384.peg.4631	NP_461452)(sinH) intimin-like protein [SinH (VF0400)]	730	10	0	96.49	4619296	4617104
fig|6666666.332384.peg.4640	VFG031495(gi:449064516)(ndk) nucleoside diphosphate kinase ndkA [Nucleoside diphosphate kinase (CVF660)]	143	10	2.82e-37	62.75	4628994	4628563
fig|6666666.332384.peg.4643	VFG009608(gi:118468429)(narH) nitrate reductase, beta subunit [Nitrate reductase (CVF318)]	209	10	7.25e-17	51.65	4631409	4630780
fig|6666666.332384.peg.4644	VFG024074(gi:315443211)(narG) respiratory nitrate reductase subunit alpha [Nitrate reductase (CVF318)]	792	3	1.03e-20	42.33	4633784	4631406
fig|6666666.332384.peg.4656	VFG043573(gi:15605121)(CT396) molecular chaperone DnaK [MOMP (AI392)]	616	1	5.67e-138	59.11	4648468	4646618
fig|6666666.332384.peg.4678	VFG010904(gi:54293730)(iraB) di/tripeptide transporter homolog IraB [Iron acquisition/assimilation locus (CVF361)]	486	2	3.86e-16	45.07	4670569	4672029
fig|6666666.332384.peg.4680	YP_095788)(fleR/flrC) sigma 54-dependent response regulator [polar flagella (AI149)]	445	10	1.46e-117	61.91	4673830	4672493
fig|6666666.332384.peg.4682	VFG031677(gi:118471880)(senX3) sensor histidine kinase SenX3 [SenX3 (CVF666)]	461	10	4.75e-22	48.63	4675978	4674593
fig|6666666.332384.peg.4694	VFG006042(gi:76788234)(cpsY) transcriptional regulator CpsY [Capsule (CVF186)]	308	1	5.97e-14	47.34	4689145	4690071
fig|6666666.332384.peg.4697	NP_208373)(pdxJ) pyridoxine 5'-phosphate synthase [Pse5Ac7Ac (AI150)]	243	1	4.26e-47	53.46	4691592	4690861
fig|6666666.332384.peg.4702	VFG016483(gi:13508404)(tuf) elongation factor Tu [Fibronectin-binding protein (AI171)]	599	5	7.31e-15	45.04	4696990	4695191
fig|6666666.332384.peg.4703	NP_249456)(mucC) negative regulator for alginate biosynthesis MucB [Alginate (VF0091)]	159	3	2.61e-11	51.77	4697721	4697242
fig|6666666.332384.peg.4704	VFG015767(gi:170720255)(mucB) sigma E regulatory protein, MucB/RseB [Alginate regulation (CVF523)]	318	10	3.04e-28	46.87	4698674	4697718
fig|6666666.332384.peg.4706	NP_249453)(algU) alginate biosynthesis protein AlgZ/FimS [Alginate (VF0091)]	191	10	7.03e-90	77.96	4699931	4699356
fig|6666666.332384.peg.4732	VFG043047(gi:16765292)(fliY) cystine transporter subunit [peritrichous flagella (AI139)]	256	2	9.94e-20	49.22	4727313	4726543
fig|6666666.332384.peg.4736	VFG012862(gi:56479760)(ipaH) hypothetical prophage protein [Mxi-Spa TTSS effectors controlled by MxiE (CVF465)]	51	1	2.86e-24	86.27	4729708	4729553
fig|6666666.332384.peg.4741	VFG035028(gi:387506605)(nleG6-1) T3SS secreted effector NleG-like protein [NleG6-1 (CVF727)]	163	10	8.97e-29	62.78	4734970	4735461
