# Supplementary material for: Genome sequencing and analysis of Salmonella enterica subsp. enterica serovar Stanley UPM 517: Insights on its virulence-associated elements and their potentials as vaccine candidates
Source: PeerJ. 2019 Jun 28;7:e6948. doi: 10.7717/peerj.6948 (PMC6601603; doi:10.7717/peerj.6948)
Supplement: Supplemental Information 3 [file peerj-07-6948-s003.xlsx]

## Sheet: detail
gi|00000000|ref|NC_000000| S Stanley UPM517 [asmbl_id: NC_000000].4736817, gc%: 52.12%
CDS_POSITION	BLAST_HIT	PHAGE ID	EVALUE	prophage_PRO_SEQ
---------------------------------------------------------------------------------------------------------------------------------------------------------------------------------------
Region 1
97..822	PHAGE_Salmon_SEN34_NC_028699: putative portal protein	phage (gi966201420)	4.6e-172	MEKLRELIALGGPAFEALLKNIDLIRQFQSNEGMTLMDAKDTFETHQYSFSGLDDILSQFAEQISGAVGIPLVRLFGQSPKGFSTGDADLANYYDRVSSLQERRLRLPVRRVLDIMHRSELGKPLPDDFTFEFNPLWQMSDVDRSTVAVNTTTAIVNALDAGLMTTKAAMTDLRENSDVTGIGASITDEDIENAEDEAPPDIGELVDKPPEPTGGDPISNEPTADSAGGRGYRKRALRWFK
839..1447	PHAGE_Salmon_SEN34_NC_028699:putative head morphogenesis	phage(gi966201421)	2.13e-149	MEALERYSEIITPWATKVAVNFTADIARQNEKQWRQHSRNISAELRNMVDRAPVGQVMQSIIAQQVRYIKSLPLEAADRVYDIQNKAIEAVVTGGRAEPFAKEIAASGDVSRSRANLIARTELGRATGALDQARALSIGSNGYIWRTAEDGDVRHSHREMEGKFVEWGRPPTLDGMTGHAGELPNCRCYKEIVFPNPHSYLA
1462..2694	PHAGE_Salmon_SEN34_NC_028699:hypothetical protein	phage(gi966201422)	0	MKYFFNTRLGETRYQLADGSLLCKDVPIGRTGKQLYGAADLPNLKPDKFGEIVVTRSPEQVFHPATLASFEGMSITILHPEDENGNVRLVNPENWKELAVGHLQNVRRGTGDQSDLMLADLIVKDESAIQLIEDGLREVSCGYDAEYEQTEPGKAEQVEITGNHVALVPKGRAGNRCAIGDRDTMANQKKSWWTRMRTAIKTGDSDTMNELLDSAPAAVTGDEGDLPGGVNLNINLSPQQPLPDKKPEMGGDVTGDGEDDIKTLLKALLAKLEGTATGDNADTPDDKDKKDPTGDGEDNEEETTITGDSAYRAEVIIPGIDLSRKVKPTAFKRDVLAAADKTLVRQVVGDADIRKLPKQSVDMAFNAVSEIAKGRNTRSTTGDAQRPGMGMTSIASLNK…
2699..3196	PHAGE_Salmon_SEN34_NC_028699:hypothetical protein	phage(gi966201423)	5.93e-115	MTAYLYRMPVGIAGAISRPQDLTVEPVILKSDNAFAAYGLAGKYDADGFFVPLAEGDTVDKVKGIYVRPYPTTSQPDMVRQVGTDKNFPGDAMKRGYMTVNVGADASSVKKGGVVYIVVSADASIPVPLGGITAAEVTGKTAALPDAFFTGAGDANGNAEISWKI
3208..4149	PHAGE_Salmon_SEN34_NC_028699:hypothetical protein	phage(gi966201424)	0	MITFDQATVDSSGAFLIGELERLDQGLNLPLVGYTWTRDIQLREDVSIADDISSWTNTSFGVAGSGANPNGKNWVGKDSTAIAGVNVDISKDGNPLNLWGMELGWTVVELAAAQQVGRPIDTQKYDGMQLKWQMDNDEQVYVGDEALGLKGLTNLVGVTLNNATKTWANSTNDEILDSVNSILSNAWAASGYSVVPSDLRIPPEQYSLLASRKVSEAGNQSLLTYLAVNTIAFHQNGVPLEIKAVKWLKGRGVGGKDRMVAYTNDKKYVRYPLVPLQSVPVQYRGLYQIATYYGKLGAVEPVYKETLSYVDGI
4191..4559	PHAGE_Salmon_SEN34_NC_028699:hypothetical protein	phage(gi966201425)	1.32e-84	MAKEKLVTIHVHTPFTLTLGDQSKQEFGRGRHNVPEEVASHWFTRAHAELSESGSNETDDQQPVIDSLQAQIADKDKLIADLKDALLKLQEQNDNLQAQITSARTGGNGAKDAKESKPANSK
4525..4932	PHAGE_Salmon_SEN34_NC_028699:hypothetical protein	phage(gi966201426)	4.2e-97	MPKNQSLPTVSDFRRDFPQFADPAKYPDVQIEFRLNLADELLSENVTGKKLFPYFAELFVAHYMTLWAADSRAMLVGGPGGSTNGVQSSKSVDKVSVSYDTSATLNPDAGFWNNTRYGAEFYQLITMFGAGGRQL
4929..5483	PHAGE_Salmon_SEN34_NC_028699:hypothetical protein	phage(gi966201427)	2.66e-130	MSFKSGVTTRVDNAQAILDALKSLTKKDVLVGIPAEDSDRDDVSFGNAGIGYINEYGSPAQNIPPRPHLVPGVKSVEDQTMPQLKAAAQAALDGNAAGAERALNRAGTVAARGVKNHIKAANFTPLADSTVEARARRGRKGAKAELARRAAGESPGTTLAKPLYDTGKYLASITHVVRDKDADS
5470..5859	PHAGE_Salmon_SEN34_NC_028699:hypothetical protein	phage(gi966201428)	5.35e-89	MPTLDVTDVLFDPDFCNFNLWVTRRVQTVDEDGIGSDSEVKTQFAGVVTVDRSLENRRMQSGQVISGAILIVTTERLTQGQTGRDADIVTYQNRDYRVTFVDPYTAYGAGFVQAHCELLPFDGGTPVEQ
5834..6400	PHAGE_Salmon_SEN34_NC_028699:hypothetical protein	phage(gi966201429)	3.15e-133	MGVLPLSNNTSTARGWLTPTSGDPDYDEALDRLLSQWMRNVSGLPAGMVRPRWQKDQPPLLPVETNWCAFGIIEWPIDDNPAFIRQTDSGTELWRHETFVAMASFYGPSGMKFASIFRDGISVEQNNSELNRMGLTLGDVSSITPFPELINQQWLRRYDITVKIRRKVTRTYNIKSIVDGNVAISTGD
6403..7554	PHAGE_Salmon_SEN34_NC_028699:hypothetical protein	phage(gi966201430)	0	MAKGLPLNRVTNVTVTLSARAAQGRNFGSMLILGNSTVIPITERLRLYSDPADIGDDFGVDSEEYKAAVVWFSQSPRPTQLYVGRWIDSLTSAESGPTETLLQAVNALLDYNSWYGLHLAVPVADYPDDADLISVSSAIESATVSRILAITSSEADILSSAVETDLATKLKAAKYSRTYIQYSSTSPYAALSAFGRAFTVNFTGSNTTITLKFKQLPGITYETIGTSQANALEAKNCNVYVYYENDTAILEQGVMCNGDFFDERHGLDWLQNAVQTADYNTLYTSTTKIPQTDAGTTTRIANIEKVLDVADKSGLFAPGIWTGGPMGQLGTGDTLTKGYYTWADTVDNQLQTDREARKGVPIQVAAKLAGAVHYGDVAITVVR
7565..8005	PHAGE_Salmon_SEN34_NC_028699:hypothetical protein	phage(gi966201431)	2.53e-104	MGAYSFLDISASLSGPTGSLDLGAGSANSEEGITVTMTEAKNTMTIGSDGEVMHSLHGGNSGVITVTLLKTSPLNKKLSIMYNAQRMSSALWGNNVIVVRNRVSGDIGTARSCAFQKQPDWNNPKVAGTVAWVFDCGKIDEVLGEF
8009..8461	PHAGE_Salmon_SEN34_NC_028699:hypothetical protein	phage(gi966201432)	5.65e-106	MECNINGVEYRAAKLNVFDQLKVTRKLLPLLAGMMTDFGSIRSLLPADGKVDSKKFDELKPVFETLLPRIADELASMKEEDTNSIIHPCLSVVARKNGTVWTPVFNSGELMFDDINLLIMLQLVARVVADSLGNFLPVSLTSEMPDQTQG
8639..10648	PHAGE_Salmon_SEN34_NC_028699:tail tape measure protein	phage(gi966201433)	0	MNAETIKDFLVSLGFDIDKAGYEKFESVLAGVTANAIKTGLAVEGAALSVVAFTAKIASGLDNLYWASQRTGATVQGIQSIGYAVSQVGGSVDAARTSLESLSRFVRNNPGAEGFLNRLGVQTRDASGNMRDMAAIFTGVGQKLSSMPYYRANQYAQMLGIDENTLMAMRRGLGGFSGQYSAMAKAIGFNADEAAKSSNRFMTSLREFGAMAGLARDKIGSNLAGGLAGSLDTLRRHILDNFPRIEQTLTKAIKGILTLGDIIGRLFFRLIEGTSSLITWWQSLDKQTRELISLFGALTIALRILNSTFWMSPIGLITALAAGIALLWEDYQTWKEGGQSLIDWEKWKPEVDVALKMVRDLKATVNDLAKALAKLLNIDPKSWSLKWDFSNFIDQMGEF…
10696..11223	PHAGE_Salmon_SEN34_NC_028699:hypothetical protein	phage(gi966201434)	8.17e-123	MLIPSVVVSEKHTDTLEITEHPVEVGAAIADHAYKKPSEVVMEVGFAGGGSLLDFASNLTATSLLGLSPQQTYQEILDLQESRIPFDVVTGKRLYSNMLIRALEVTTDRTTENVLSAVLTLREVLISQTQQVTVADKTDMKDGASTSPVLNTGTKTTKPPNTSLLQSGAAFLGLG
11223..11525	PHAGE_Salmon_SEN34_NC_028699:hypothetical protein	phage(gi966201435)	2.09e-68	MTIQEIPLTADNQQFSIILAGITWRIRIIWRDLYWIMDLQNDRGEPVISGIPLVTGADLLAQYAYMGLGFKLVVMCDDSTQDYPTKTDLGGRSHLLVLTE
11528..12592	PHAGE_Salmon_SEN34_NC_028699:hypothetical protein	phage(gi966201436)	0	MSQNWMRHFELQLVGENGQGIQLSDFKVTFTIDWFNISSASRVGTFKIYNLSADTVNRITGQEFSKVRLIAGYDGIALEVAASDVGIAREVDADTVGQSDGRNYGLIFSGEIRYSVTGKDSPIDSYVLIQAADTDLAFATSITSQTLAAGYTVADVNRALMKDFEAKGATEGLTPEMPATVFPRGRVLFGMTRHLMDNVAGQCGATWQFVDGQRQMVANNEYVHDAIVLNSATGLIGMPQQTIGNGVNVRALINPNIRVNGLIQLDQASVYRTALSNNDIAMAGGRITDQNTDGNITLSGTTAQLASIATDGVYVVKGIMYTGDTRGQAWYMDMMCFARGASDIPSQSAMNRGA
12976..13320	hypothetical protein	-	N/A	MLSQISDCKRISAYADVDINRTCFNQIGNDLSLFASVIKDKNITGIAKKAALRDSTYGTKIDFGHAARLAKMHATLCQKQGGKGFVKMSTVAVPCGSSGDVINYRSASKMGLIN
13384..14136	PHAGE_Salmon_SEN34_NC_028699:baseplate assembly protein	phage(gi966201439)	3.94e-125	MAVSDQTRSGDLAETFKSERETTKNQIRVALPGIIQSFDPDAVTAVVQPAIRSVETDNDGNRVTKPYPLLVDVPVVFPRGGGCTLTFPVKAGDECLVIFADRCIDFWWQNGGVQEPVDDRVHDLSDAFCIVGPQSQAQKISGISTGAAQLRSDDGSTFFELNPSTQKIKIVAPGGLDIVTPLADFSEKVTIHGLLSWLGGMVGSVVSGVASKITGAVEFIGSVKANGKVIDNTHTHGGVQHGGSNTDEVN
14136..14489	PHAGE_Salmon_SEN34_NC_028699:hypothetical protein	phage(gi966201441)	7.18e-79	MRYRREDGEGDYTFGSGDDTWLINSPEAVAQAVKTRFALWYGQWFLDKTEGTPWIQSVLGKQKPETYNLAIRKRILETRGVKSILSFNTTVNTTTRRVQFFAEIDTIYGTTTVTSEA
14490..15122	PHAGE_Salmon_SEN34_NC_028699:hypothetical protein	phage(gi966201442)	2.95e-109	MALNLDTLGLSATVTAEGISAPDYQTILDTLTSYFQQIYGSDAYLEPDSKDGQMVALVALAIHDANNTAISVYNCFSPVTGYGAALTSNVKINGIARKGATNSTVDLLLTGSAGTTITNGTVKDTNNVIWRLPDSVVIGVDGTVTATAICSKSGAVAAPAGTITTINTPTRWLDVSNQPGSGHRWRTCRNGRRTAHQAGAECRDTIHHTI
15127..15690	PHAGE_Salmon_SEN34_NC_028699:hypothetical protein	phage(gi966201442)	6.16e-129	MDGAIANIAGVTRHKLYENDTGKTDGNGLPPHSISAIVDGGDVTEIARTIRGNKGQGVRTWGKTSVTVPDKYGNPHIISFSRPTDVPVYGKITLKVFAGYTSQIGVQIQQAVADYINRLMIGDQVLLSRIYSPANLGVVSGGNARYYDIQELLIGKSPEAVAAANINIAYDESASCKPENIIITVAA
15687..16367	PHAGE_Salmon_SEN34_NC_028699:hypothetical protein	phage(gi966201443)	3.79e-161	MSKYTDLITNYHATKPKFVEHIDLVTRPLAETSAAINGLINAFDIDHATGIQLDILGQWIGLSRIVSQPISGVYFSWDTDGLGYDQGVWQGPYDPDSGYTSLSDETYRIVLKTKIAIKNWDGRNDSLPPILDAALDGSGLKMQIVDNQDMTIGIWVFPETDISSVSLELIAAIRQGYLTVKAAGVWGGSIEIPSVETPSEGNRFFGFDMDNEYISGFDAGSWGTLL
16367..16876	PHAGE_Salmon_SEN34_NC_028699:tail fiber protein	phage(gi966201444)	6.53e-96	MAKNDFKPFATGKGANVTSQPDWEALPALLSGFTAGKASSAQVNKALRQASFIAAALAQYTASKSGQDVLDDGDLSGFIAKMSAAFGKDFQTLDATLTALAGLATGADKLPYFTGNDTAGQTDLTSVGRDIIGKASIADILTYLGLXPCKNRRTAAIFPIKPHLLNTSA
16873..17565	PHAGE_Salmon_SP_004_NC_021774:phage tail fiber protein	phage(gi526003631)	3.12e-09	MKETLNPTKRVSIGNIGTGVFDGSTPCINIGDSDSGFIGSADGVLDIYCNGAKVGYINGNGLHMLTDIHFDNARMTTNGDIFSSVWGNNWLSIWITNQLNTRGTIDWINSELAIRDNNINTRATIDYVNQTFARKNTGSIQDWGWILDDSTGFIMQWGTLGNSNGTYNFPRAFPVGCFAVFVTNTNAQGTQVDNAFGYPVSNSQFFAATKSSGMANLVNNFPVAWFAIGR
17572..17979	PHAGE_Salmon_SP_004_NC_021774:tail fiber assembly protein	phage(gi526003632)	3.39e-31	MSEYYYSFKEKGFFWQPDTESDNYPDDLIPLTDEYYRELMQGQVDGKYIEHRKGGPVLVEHREYTPEELVAQAEARKAELLAEAESVIAPLARAVKLNIATDEEIKRLEAWELYSVMVNRVDTTNPDWPEKPASQ
18411..19151	PHAGE_Entero_fiAA91_ss_NC_022750:tail fiber	phage(gi557307600)	1.31e-52	MSAADVNAFALGMTGDYTLENDKSVGWNWKSGVYNVPTGGASKLILHFNMNIGSCPAVQFCVNYKNGGISYRSARDGFGFELDWTEFYTTTRKPSAGDVGALPVSGGVINGNLGIGTPNILGGSSIVLGDNDTGLKQNGDGLLDIYANGVQVFRFQNDTLESKKSINVTGRLTPTDYGNFDSRYVQDFRLGSYESGQAWMGPGFSDTPGYVLTAATNGNSDEIIDGLGRRPMQKLIGNQWYNVTSV
19154..19693	PHAGE_Entero_SfMu_NC_027382: tail fiber assembly protein	phage(gi849255281)	1.14e-81	MMHLKNIVAGNPKTPDQYQLTKKFGVVWLYDEDGRNWYEEQKNFAADTLKVAYDKSNIIVAINKDASKINPEGRSVVELPDITANRRADVSGRWMYDGEREQIIRRVYTPEELRQQVEAKKIKLLEEAETVITPLARAVKLGIVTDEEQQRLVAWEQYSVLVSRVDTSAPDWPEKPASH
complement(19697..20284)	PHAGE_Salmon_SJ46_NC_031129:hypothetical protein	phage(gi100034)	9.93e-133	MKKYQDIKNFRLIDAPVNRGKTQSEINIGAYFLESEDGQDWYECQSLFSDDTAKIMYDHEGVIWGVVNKPVPQRGNTYAVSMLWPVNMSVAEIDAADCPDDCRGDGSWLYRDGKVLPVPVDYQAKAETTRQKLLDAANSAIADWRTELALGEISDDDKASLTKWMAYIRELKSLVLTGISDEATFNKIQWPVLPQ
complement(20284..21042)	PHAGE_Salmon_SP_004_NC_021774:phage tail fiber protein	phage(gi526003631)	2.78e-76	MSNSDSVADFPTYPDGSKLYSYGYMFVEKIGEVWFQHYYAHMGANAKRQDWGTEPNTSRPWVIDYNTANKPSAGDVGALPITGGCLNGPLGMGTDNALGGNSIVLGDNDTGFKQNGDGVLDIYANSAHVLRFISSFVESMVPLKVNGNAVATGEVQAGNGSSRMTNNGDIFGSVWNGWLSTHLNNNLVADIQLGAGTSVSTWDKAGSWPNTPGYVVTSVWKDANGVNIDGIAYAPLQKRLGTQWYTVQGGTA
21035..21295	hypothetical protein	-	N/A	MDTDTRHHPGVLADAIVSLSVISPTASAEMASTSDAHKVISPDSGLLLTXXXXXXXXXXXXXXXXXXXXXXXXXXXXXXXXXXINC
complement(21613..24186)	PHAGE_Escher_121Q_NC_025447:ClpA-like protein	phage(gi712914779)	3.43e-82	MRLDRLTNKFQLALADAQSLALGHDNQFIEPLHLMSALLNQEGGSIRPLLTSAGINAGQLRTAIDQALSRLPQVEGTGGDVQPSSELVRVLNLCDKLAQKRGDNFISSELFVLAALESRGTLTDLLKSAGATTANITQAIEQMRGGESVNDQGAEDQRQALKKYTVDLTERAEQGKLDPVIGRDEEIRRTIQVLQRRTKNNPVLIGEPGVGKTAIVEGLAQRIINGEVPEGLKGRRVLALDMGALVAGAKYRGEFEERLKGVLNDLAKQEGNVILFIDELHTMVGAGKADGAMDAGNMLKPALARGELHCVGATTLDEYRQYIEKDAALERRFQKVFVAEPSVEDTIAILRGLKERYELHHHVQITDPAIVAAATLSHRYIADRQLPDKAIDLIDEAAS…
Region 2
58496..58508	attL	-	N/A	AAAAAGCCCCGAA
63705..63752	attL	-	N/A	ATGTAGGAATTTCGGACGCGGGTTCAACTCCCGCCAGCTCCACCAAAT
63796..63939	PHAGE_Salmon_RE_2010_NC_019488:hypothetical protein	phage(gi418489728)	3.97e-27	MAAKWRQSVGLAATKNPPLKRVLFRNSCGLDHLFPDVVAQKKLDSVL
complement(64153..65253)	PHAGE_Salmon_RE_2010_NC_019488:gene D protein	phage(gi418489726)	0	MNVNSDLLNLNSKSPAFSITIEGKDVTTVMDTRLMSLTLTDNRGFEADQLDLELDDADGLIALPRRGAVIQLALGWKGQPLFPKGAFTVDEIEHSGAPDRLTIRARSADFRETLNTRREKSWHQTTVGEVVKEIAARHNLKVALGKDLTDKALDHMDQTNESDASFLMKLARQYGAIASVKDGNLLFIRQGQGRTASGKQLPVITITRKAGDGHRFTLADRGAYTGVIASWLHTREPRKKETTRVKRRRKKTTTPKEPEAKQGDYLVGTDENVLVLNRTYANRSNAERAAKMQWERLQRGVASFSLQLAEGRADLYTEMPVKVTGFKQPIDDAEWTITTLTHSVSPDNGFTTSMELEVKIDGLEIE
complement(65250..65735)	PHAGE_Salmon_RE_2010_NC_019488:tail protein	phage(gi418489725)	7.49e-113	MMMVLGLYVFMLRTVPYQELQYQRSWRHAANSRVNRRPSTQFLGPDNDSLTLSGVLLPEVTGGRLSLLALEQMAELGKAWPLIEGSGTIYGMFVIESLSQTKTEFFASGMPRRIEFTITLKRVDESLSDMFGSLSDQLSNLQDSAASAIGGIKNTVGGLLQ
complement(65732..68539)	PHAGE_Salmon_RE_2010_NC_019488:tail tape measure protein	phage(gi418489724)	0	MSDNNLRLQVILNAVDKLTRPFRSAQASSKELAAAIQQSRARLKELDAQAGRIDGFRKASAQLAVTGNSLKAAREEAAKLATQFSATNRPTAAQARLLEQAKNRVTELQSKYNGLRQSVQRQRLALNEAGLDTKKLSSAQRELRQNADETRQALDRQQKSLKSLGEQQARMNAVRDQYSRRLEVRDRIAGAGATTTAAGVAMGAPVVAAVKSYASMEDAMKGVAKQVNGLRDDNGNRTKQFYDMQDAIKAASEQLPMENGAIDYAALVEGGARMGVTNQDDPYEEQKRDLLAFASTAAKAATAFELPADELAEGLGKIAQLYKVPTRNIEQLGDALNYLDDNAMSKGGDIINVLQRMGGVADRLDFRKAAALGSTFLSLGTAPEIAASASNAMVRELSI…
complement(68532..68651)	PHAGE_Salmon_RE_2010_NC_019488:tail protein E'	phage(gi418489723)	2.26e-21	MADIATIFHWSPSITDVMPLTEVLAWRYKAIQRSGASDE
complement(68666..68968)	PHAGE_Salmon_RE_2010_NC_019488:tail protein E'	phage(gi418489722)	4.52e-62	MSDKLTEKTVKLDTPIMRGKTEITEIVLRKPQSGALRGTRLQAIMDMDVGAMMTVIPRISTPTLTAQEMAELDPADLTALSVEVVTFLLKKSVLAGLPTA
complement(69023..69538)	PHAGE_Salmon_RE_2010_NC_019488:major tail tube protein	phage(gi418489721)	1.52e-120	MALPRKLKHLNLFNDGNNWQGSVESLTLPKFTRKFEKYRGGGMPGAVDVDMGLDDGALDTEFSIGGTELLLFKQMGKATVDGIQLRFTGSIQRDDTGEVQAVELVVRGRHKEVDSGEWKTGESSSTKVSSTNSYAKLTINGEVLYEVDLVNMVEIVGGVDLMEEHRNALGL
complement(69548..70720)	PHAGE_Salmon_RE_2010_NC_019488:major tail sheath protein	phage(gi418489720)	0	MAQDYHHGVRVVEINEGTRPITTVSTAIVGMVCTGDDADASVFPLNKPVLLTDVLTASGKAGESGTLARSLDAIADQAKPVTVVVRVAQGETEAETTSNIIGGVTSDGKKTGMKALLSAQSQLGVKPRILGVPGHDTQAVATELLGVAQSLRGFAYLAANGCKTVEEAIAYRENFSQREGILIWPDFINFDTVLKADATAYASARALGLRAKIDEQIGWHKTLSNVGVNGVTGISADVFWDLQDPATDAGLLNKNDVTTLIRKDGFRFWGSRCLSDDPLFAFENYTRTAQVLADTMAEAHMWAVDGVLNPSLARDIIEGLRAKMRSLVNQGYLIGGDCWLDESVNDKDTLKAGKLTIDYDYTPVPPLENLMLRQRITDRYLVDFASRVAA
70753..70872	PHAGE_Salmon_RE_2010_NC_019488:hypothetical protein	phage(gi418489719)	6.54e-23	MFWLPGVRRTYFTMCQCWYNIATFNATDLQGISCKEWKC
complement(71452..72306)	PHAGE_Salmon_RE_2010_NC_019488:tail fiber protein	phage(gi418489713)	0	MSAKFYTLLTDIGAAKLASATALGIPLKITHMAVGDGGGVLPTPSAQQTALVAERRRAALNMLYIDPQNNSQIIAEQVIPETEGGWWIREVGLFDETGALIAVGNCPESYKPQLTEGSGRTQTVRMVLITSSTDNITLKIDPAVVLATRKYVDDKALELKVYVDDLMAKHLAAPDPHSQYAQKDSPTLTGIPKVPTPAAGNSTKQIANTEFVASSIAAMVDSAPAALDTLNELAAALGNDPNFATTMINALAGKQPLDNTLTNLSGKDIAGLLTYLGLGETRFA
complement(72303..72908)	PHAGE_Salmon_RE_2010_NC_019488:tail protein I	phage(gi418489712)	1.08e-142	MNSLLPPGSSPLERRLAQTCSGISDLQISLRDLWNPATCPIRFLPYLAWAFSVDRWDESWTENVKRRVVQDAFYIHQHKGTTSAVRRVVEPFGFLIRIIEWWQTGETPGTFRLDIGVQDHGITEDTYLELERLISDAKPCSRHMTGMSINMQTSGPYWVGAASYLGEEITVYPYINETIISGGTAYEGGAVHVIDTMRVNP
complement(72901..73809)	PHAGE_Salmon_RE_2010_NC_019488:baseplate assembly protein	phage(gi418489711)	0	MAVIDLSRLPPPQIVDVPDFETLLAERKAAFVALYRVDEQDAVRRTLALESEPVTKLLQESTYREILLRQRINEAAQAVMVAYSMGNDLEQLAANCNVKRLTVVPADNDAVPPVAAVMEDDEALRQRIPAAFEGLSVAGPTGAYEFHARSADGRVADASAISPAPAEVVLTVLSREGDGTAVKDLLDVVEKALNSESVRPVADHLTVRSAEIIPYRVEATIFLYPGPEAEPVMVAAKASLQRYIASQTRLGRDIRRSAIYAALHVEGVQRVELTSPLEDVVLDKTQAASCTEWSVTNGGTDE
complement(73796..74155)	PHAGE_Salmon_RE_2010_NC_019488:baseplate wedge subunit	phage(gi418489710)	3.25e-79	MTLYIGMSRNDGQALADTDHLRQSVRDILLTPQGSRIARREYGSLLSALIDQPQNPALRLQIMSAVYVALHRWEPRLTLDSITINGNFDGSMVVELMGHSNNGAPVSLSISTGADNGSH
complement(74152..74730)	PHAGE_Salmon_RE_2010_NC_019488:baseplate assembly protein	phage(gi418489709)	9.65e-138	MNAQLTEIMRLITNLIRTGTVTEVDRENWLCRVKVGELETNWINWLTLRAGGARTWWCPSPDEQVVVLSMGGNLETAFVLPAIYSNQFAPPSDSVDGCVTEYPDGGWFEYEPATGRWHVRGIKSMVIEAVDNITLKTGEFVVEADTTRINSEVVINGGVTQGGGAMSSNGVVMDKHGHTGVKSGGDTSGGPV
complement(74799..75245)	PHAGE_Salmon_RE_2010_NC_019488:tail completion protein	phage(gi418489707)	5.28e-91	MDELQKVDDWLTALLANLEPAARNRMMRQLAQQLRRTQQQNIRLQRNPDGSGYEPRRVTARSKKGRIKRQMFAKLRTTKYLKTAASADSASVQFDGKVQRIARVHHYGLRDRVSRKGPEVRYAERRLLGVNDEVETITRDTLLRWLAG
complement(75238..75669)	PHAGE_Salmon_RE_2010_NC_019488:tail protein	phage(gi418489706)	3.82e-95	MNKPQSLRSALNKAVAYVRDNPDKLHLFVDNGSLVATGASSMSWEYRYTLNVVIEDFSGDQNLLMAPVLLWLSTSQPDAINNPDLREKLFTFEVDILRNDVCDISMNLQLTERVLVSTDGNVSSVEAVSEPDEPEEMWTVKRG
complement(75632..75805)	PHAGE_Salmon_Fels_2_NC_010463:P2 LysC-like protein	phage(gi169936037)	1.11e-33	MTQCRLERSAPRSNGDLNAVLDETEAAWAVCADKVDTIIACQERDSEQTAVLTQRPE
complement(75765..76193)	PHAGE_Salmon_RE_2010_NC_019488:lysozyme subunit B	phage(gi418489705)	2.24e-67	MTRALAVILALVLALLGWQSWRLNNAGHTIGTQAEALKKNKQELAKKNSQLISLSILTETNSRAQMQLYAAAEETSALLRSRQRRIEELKRENEDLRRWADTPLPADIIRLRERPALAGGAAYREWLSQSDAVPPGKVSAAQ
complement(76190..76705)	PHAGE_Salmon_RE_2010_NC_019488:lysozyme; phage lysin	phage(gi418489704)	2.09e-92	MSPSIVKRCLVGAVLAIAATLPGFQSLHTSVEGLKLIADFEGCRLQPYQCSAGVWTDGIGNTSGVIPGKTITERQAAQGLINNVLLTEKRIEACLQVKPPQHVYDALISIGFNVGTGAICRSTMVSYINRQQWWQACNQLPRWVYVNGQRNKGLENRRARELAWCLKGAGA
complement(76686..76901)	PHAGE_Salmon_RE_2010_NC_019488:lysis protein S	phage(gi418489703)	1.59e-29	MTLERISAFITYCVALLLAWLGDLSLKDVSTITGLALGIITAAVTCYLRWKAYQLLRDGRISRGEYESFNR
complement(76905..77108)	PHAGE_Salmon_RE_2010_NC_019488:tail component protein	phage(gi418489702)	2.14e-44	MKVRAHQYDTVDALCWRHYGRTQGVTEQVLQANPGLAEYGPFLPHGLQVELPDITASTTAQTVQLWD
complement(77108..77575)	PHAGE_Salmon_RE_2010_NC_019488:head completion-stabilization protein	phage(gi418489701)	6.23e-62	MQFVSPEQAGESTQDVIKNTSFWPDVRVSEFRRDMRMDGSVTDPRLRLALLTAIAEVNADLYEFREKQRAQGYASLADVPADVIDGESQRLMLYRRAVFCWAKANLVERYRDFDATGDGSKKAEDIETTLGELWRDVRWAESRLRDMPHMTVELI
complement(77674..78327)	PHAGE_Salmon_RE_2010_NC_019488:terminase endonuclease	phage(gi418489700)	2.08e-64	MNPFRAHTQYVQAQDAARQGGSNASLTGYNQMLLQLTEHRRRLKTVQSNERKAQLKREFLPAYASWIAGLLDADASGQDDVAMYVMIWRIDAGDYTGALDIARHAIKHGWVLPQRFNRTCGTAVAEEFADAAMRAFSAGESFSAAILTQVLDIVEGQDMPDQSRARLHKAMGYALRDNDQAVAALNHLKRALQLDNSSGVKTEINKLESRLRQAMSA
complement(78331..79479)	PHAGE_Salmon_RE_2010_NC_019488:major capsid protein	phage(gi418489699)	1.09e-168	MKKETRFKFNGYLTQLAKLNGVSVSDIASKYTAEPSVAQTLETKIQESSSFLQKINIVPVDEQSGERLGLGIGSSIAGNTDTTQKDREPVDPTYIDGEGYKCTQTNSDTALPYAKLDLWAKFQDFQTRIRDAIITRQALDRIMIGFNGMKREKTSDRKTYPLLQDVNIGWLEKIRQEKPVQVMDKIVSEGEVISQTIRVGKGGDFLNLDALVMGAVNEKIAPWYQEDTELVVIVGRQLLADKYFPIVNRDQPNSEALAADLIISQKRIGNLPAVRAPFFPANAMLITRLDNLSIYWQAGTRRRSVIDNPKRDRVENYESVNEAYVVEDYDGACLVENIELLPEQADGNPGAALTAENIQTIVAAAVQGALDAQNAGGTGDGA
complement(79495..80322)	PHAGE_Salmon_RE_2010_NC_019488:capsid scaffolding	phage(gi418489698)	1.57e-107	MAKKSKRFRIGVEGATTDGRVIEREWLTQMAASYNPQVYTALINMEHIKGFTPDGPFRRFGMVEKLEAEEITEGALSGKMALYGWIAPTDDLVTMTSNWQKLFTSMEVNTSFADTGSAYLVGLAITDDPASLGTEMLQFSASAEHNPLARRKLDKDNLFTAAVETLIEFEDVPEKTSLFTRVKELLSRKSADDNARFADVNQAVETIAREHQTLAEQVSTHQTDFSNKLSDLQKVVDETTSALSTLREQLSTQDSRSERRPNATGNNGAEQTTDC
80523..82235	PHAGE_Salmon_RE_2010_NC_019488:terminase ATPase	phage(gi418489697)	0	MYFQGYRVARIAEMLGEKVATVHSWKKRDKWGEYGPLDQMQLTTAARYCQLVMKEQKEGKDFKEIDLLARQSERQARIGKFNNGGNEADLNPNVANRNKGPRKPPEKNLFTDEQIEKLEEIFRAGMFEYQRHWWDAGIKHRIRNLLKSRQIGATYYFAREALIDALTTGRNQIFLSASKAQAHVFKQYIIDFAKEVDVELKGDPMVLPNGACLYFLGTNARTAQSYHGNLYLDEYFWIPKFQELRKVASGMALHKKWRQTYFSTPSSLTHSAYPFWSGALFNKGRPKADRVEFDLSHSSLAHGVLCPDGQYRQIVTIEDAVNGGCNLFDLDQLRLEYSPDEYNNLLMCQFVDDLASVFPLALLQSCMVDSWDVWDDFEPLLLRPFAYHPVWIGYDPAKG…
82235..83284	PHAGE_Salmon_RE_2010_NC_019488:capsid packaging	phage(gi418489696)	0	MANRKNRSKAPRGQTATDTANMVSNAHAEAFTFGDPIPVMDRRELFDYLECVQVDRWYEPPISMDGLARTYRAAVHHSSAIQVKRNILTSTFIPHRWLSKQAFSRFAQDFLVFGNAYLEKRMNRLGQIMELRASLAKYTRRGIDPDTYWFAQYGYNAQPYQFDEGSVFHLMEPDVNQELYGMPEYLSAIPSALLNESATLFRRKYYLNGSHAGFIMYMSDPAADQKDVDNIREALKKSKGPGNFRNLFMYSPNGKKDGIQIIPLSEVAAKDEFLNIKNVSRDDMLAAHRVPPQLMGIIPMNTGGFGDVEKAARVFVRNELTPLQGRITEVNEWLGDEVIRFNPYLTDED
complement(84114..85379)	PHAGE_Oenoco_phi9805_NC_023559:transporter	phage(gi589286180)	6.76e-07	MLIEFNVENYLSIKNKQTFSLIANKSNELEENIFTVEGNVNLNVLKSAVIYGANAAGKSNVLLAVRAMMDIVTQSASNTQAGEEVPVFPFKLDSDSIKNPTEFEVTFIAEGIRYQFGFSATNERIIDEWLFAYPKGRPQKWYFRAWDEEKQEYEWDFGASLLGEKQVWQRSTRNNALFLSTAVQLNSEQLKPVFTWFKKTLRLSGIKGWANTFSAKRCTEDTKKDILNFLKAADIGIDDVLVTKEKFNPDDLPSDMPDDIKKIVISNMKDKDIFDVTTVHYNDKGEPVSFSLEEESHGTQKLFSLAGPWLDALDNGYVLFIDELHDTLHPKLVSFLVNLFNSPDTNKKGAQLIFSTHETSILNQSIFRRDQVWFCEKNELSETNLYPLTDFSPRKGREN…
complement(86163..86282)	hypothetical protein	-	N/A	MFVLFVALRQFIHNFKVKRSYEYKIGKMLSDIIDNNAEK
complement(86414..86878)	hypothetical protein	-	N/A	MNKTSSLASGGVAVAAIIALKLFAKTAIFASLFGGAAVAKNMYESSVMKVKGEVEEFNKKNPSEPIYMYEDKKELVFNDVINDVSDSDVENANQDALNNVKESMKKDDVDFIEKNKDSASNYFLIKHGWTETHKVKTKNDTLVVSYKIVSTDLE
complement(87201..87389)	PHAGE_Salmon_RE_2010_NC_019488:-hypothetical protein	phage(gi418489693)	1.21e-32	MQDYLLESLKLQRIDFFIKLVAASECSDEEKRLAIQWVSELTDELMAKIRAHEYGRSMDLPS
complement(87545..89950)	PHAGE_Salmon_RE_2010_NC_019488:replication protein	phage(gi418489692)	0	MSKLTLHNAPTTGGSNEAAVAFSWNNPKKAVNPYLDPAEVAPESALSNLIALYAADNEQEQLRREALSDEVWERYFFNESRDPVQREMEQDRLISRAKMAREQQRFNPDLVILADVNAMPSHISKPLLERIKYFHSLGRAKAYSRYLRETIRPCLERLECVRDSQVSASFRFMASHDGLEGLLVLPEMNQDQVKRLSTLVAAHMSMCLDSACGDLFVSDDVKPEEIRQAWERVAAEAMRLEVIPPAFEQLRRKKRRRKPVPYELIPPSLARMLCADWWYRKLWQMRCEWREEQLRAVCLVNKKASPYVSYEAVIHKREQRRKSLEFFRSHELVNEDGDTLDMEDVVNASNSNPAHRRNEMMACVKGLELIAEMRGDCAVFYTITCPSRFHATLNNGRPN…
complement(89947..90804)	PHAGE_Salmon_RE_2010_NC_019488:DNA adenine methyltransferase	phage(gi418489691)	7.99e-148	MTTILKWAGNKTAIMPELIKHLPAGSRLVEPFAGSCAVMMATDYPHYLVADINHDLINLYLMIQTDHEAVIQIARELFKDFNSDVQYYRVRQHFNYSISNEVEKAAYFLYLNRHGYRGLCRYNQKGEYNNPYGHYKKPYFPENEIRTFAEKAKRATFICASYDETLALLQAGDVVYCDPPYDGTFSGYHTAGFTEDDQCHLASILERRSSEGHPVIVSNSDTSLTRSLYRNFTRHRITAKRSIGVAAGESKSAAEIIATKSAGWFGVDLAFGPDISVETEVRAWQ
complement(90801..91385)	PHAGE_Entero_186_NC_001317:Orf81	phage(gi9634093)	4.73e-140	MSITNATISQRAKKWLEDDRIFIDTETTGLGDDAEIVEICLIDSAGFIMLNTLVKPTKPIPAEATAIHGITDEMVMYAPTWKDIHGAVASLFFEYGFVIYNADYDTRLIYQTAKLYGLENDGFCYFLNERSACAMMLYAEYRGEPGRFKGYKWHKLVDAAAHEGVSVEGKAHRALADCKMTLGLVHELAKGGAK
complement(91382..91609)	PHAGE_Salmon_RE_2010_NC_019488:Zinc-finger containing protein	phage(gi418489690)	4.14e-42	MADSMDLVQQRVEEERQRHIHTARNKTPGVSRVLCIDCDAPIPPARRRAIPGVQCCVTCQEILELKSKHYNGGAL
complement(91609..91842)	PHAGE_Salmon_RE_2010_NC_019488:hypothetical protein	phage(gi418489689)	6.21e-28	MRNIETRITKTGPDDAGLNQLLTDARMEERRARAAAMAARLDSLACHITSRQLNHVEAAELLRIAAENIQNEAQEIH
complement(91910..92251)	PHAGE_Salmon_RE_2010_NC_019488:hypothetical protein	phage(gi418489688)	3.51e-67	MAIDGPVATVPLSPGKRLDGLNHIAELRAKVFGLNIESELERFIEDMRDQRDVNNKQNERALAAIFYMAKIPAERHSVNISDLTTDEKRELIKAMNHFRAVVSLFPKRLTMPN
complement(93118..93627)	PHAGE_Salmon_RE_2010_NC_019488:regulatory protein	phage(gi418489686)	9.75e-114	MFDYKISKHPHFDEACRAFALRHNMAKLAERAGMNVQTLRNKLNPEQPHQLTPPEIWLLTDITEDSTLVDGFLAQIHCLPCVPLNEVAKENLPHYVMSATAEIGRVAAGAVSGDVKTTAGRRDVISSINSVTRLMALAAVSIQARLQANPAMASAVDSVTGLGASFGLI
complement(93660..93902)	PHAGE_Salmon_RE_2010_NC_019488:excisionase	phage(gi418489685)	6.25e-30	MSTDISIRVPKEMATPAEFAEWEGISRGSVYQKIHHGQLAKYMVKKEKNKGRVSLRYLMYKTDQVRESLGHSNFRVIVGQ
94019..94651	PHAGE_Salmon_Fels_2_NC_010463:P2 Cl-like protein	phage(gi169936063)	5.65e-143	MSLIKAGNDSGGRDAINRLIKAYNFSSRQQLCEHLDVSKSTMANRYLRDSFPAEWVIQCALETGISLLWLATGQGDMYASENEEKNLKNETPVTVRPLSKIVAPSIKHAELKNGELLPSDEILLDSRLLDGESSNSLFVKTASDSFVVDTSVKQISNGYWLVDIDGVKSFVKIARIPGNKIVVHQDEASFECAVDDVEVIGRAVKVIKSI
94654..95679	PHAGE_Salmon_RE_2010_NC_019488:intergrase	phage(gi418489683)	0	MTIRKQPNGKWLCECYPNGRDGKRVRKQFATKGEAIAFENHTMDEVNKKPWLGEKEDRRHLSEVIDQWHSLYGQTLADPKRLMAKLSIICNGLGDPIASELTAGDFTKYREARLKGEVKNEDGVLMSPVKPRTVNLEQRNLSSVFGTLKKLGHWSAPNPLAGLPTFKIAEGELAFLAPEEIKRLLDACADSQNPSLLMIAKVCLATGARWSEAENLQGHQLSKYRITYTKTKGKKNRTVPISQDLYDELPKNRGKLFTPCRKAFERAVKRAGIELPEGQCTHVLRHTFASHFMMNGGNILVLRDILGHADIKMTMVYAHFAPDHLEDAVTKNPLHNLNWKR
95797..95844	attR	-	N/A	ATGTAGGAATTTCGGACGCGGGTTCAACTCCCGCCAGCTCCACCAAAT
96025..97215	PROPHAGE_Escher_MG1655:CP4-57 prophage; intergrase	phage(gi16130540)	5.89e-175	MARITRPLTNNEILKAKPRKKDFTLHDGDGLFLLVKTTGKKLWRFRYQRPGSSSRTNLSLGSYPALTLAAARQIRDQHLITLAQGMDPQQQQEQASEQRQIELDSIFSTVAANWFQIKSRSVTEDYAKDIWRSLDKDVFPAIGAIPVQEIKARTIVEALEPIKARGALETVRRLVQRINEIMIYAVNTGLIDANPASGVGMAFEKPKKQNMPTLRPEELPKLMRSLVMSNLSVSTRCLIEWQLLTLVRPSEASGARWVEIDLDAKLWTIPAERMKAKREHIVPLSPQALEILDAMKPISAHREHIFPSRNDPKHAMNSQTANAALKRIGYGGKLVAHGLRSIASTAMNEAGFNADVIEAALAHSDKNEVRKAYNRSTYLEQRKELMSWWGSRVNKI
complement(97253..99151)	PHAGE_Bacill_0305phi8_36_NC_009760:PcrA helicase	phage(gi156564011)	4.46e-57	MIDNLSQSQIEVVRAPMGGAIQVLASAGSGKTRVLTERVRFILNNSARGSVVALTFTNKAADEMLERLDDGSENRDRIWIATIHSVAQRVLESYGYTIGLPKELHIFERDQDRMEVFLHSLREQGVNIDEYLDVEDVREKRNREKIISQYLNVFSIIKRELLTEDEVKIKFSSNPRIWNIYQDYQSALLESGGVDFDDILLYAHKILLNQESVARIYQKKYVALFVDEAQDLNRAQYEFIKVLCGDKIKDVMMVGDSDQMIYGFNGSSSDYFIKSFVKDFTPKTYCLNENYRSSKAVIELANKLKPNSQVGVNAALDGYKSFNALPDEESEAIWVCDSIQHILNLKRHPEIEGDIDCSKIVVIGRNRFVFKAMESELKKRNIPYFLKRSDRNESPVSLI…
complement(99148..100923)	PHAGE_Entero_P2_NC_001895:Old	phage(gi9630369)	1.22e-09	MSILINSVRISGFRGIKEIEVELGRIAVLLGTNNAGKTSFLKSLQLALGDYQRYFSDEDLHIDSSGLKVNEVIVDLKIIPTDEHYNKTEEFDEKWIDVFGDNIAVDANGHEFVAIRTKVQPDEIKGGFNTQRYYLNEWGEFEGWKEIVVNERRKVRTKVDAIPYICIEAQRDIHHELKDKSSYIGKVLSYIKYEDEDVTALEEMISSINETAVSRSEPLQSLKNSLQGLNQSFLGSSHTEITPFPKKIRDLSKQFTVHFGDEENHSFSMEYHGTGTRSWASMLTVQSFLSFMHERHELENKALHPIVGAEEPEAHLHPNAQRTLFKQLSSSQGQIILSTHSPYLSAMAEIEDIRSFIKKGDGVTVNCLKKRIEHDEKNALKREIMLTRGELLFSRALIL…
complement(101232..101798)	PHAGE_Entero_P4_NC_001609:amber mutation-supressing protein	phage(gi9627520)	4.47e-79	MTTVTIQQAFEACQTNKNTWLKRKAELADLEREYREQLLAGDEQIPRRMQDLRDNIDVKKWEINQAAGRYIRSHEEVQHISIRNRLHDFMQQHGAELAATLAPELMGYNEQIPAVKQSAMQHSVDYLREALSVWLAAGEKINYSAQDSDILTAIGFRPDAASRDDNRQKFTPAQNLIYTRRRAELAAR
complement(101814..102053)	PHAGE_Entero_186_NC_001317:B protein	phage(gi9634083)	3.03e-19	MFHCPFCKKTAHVRTSRYLSENVKQRYHQCTNIECSATFRTIESVDGVIRAAPEKTDPAPVTPPPPRKVQGCYSSPFRH
complement(102057..102800)	PHAGE_Entero_P4_NC_001609:head size determination protein sid	phage(gi9627518)	2.81e-22	MKPELIIKAMQTVISKQDEGAEQRIAGALAALNEAKDAHTASMGKLSDIEASIQRCEQERQTALSESAQAEQDWRSRFRTLRGNLTPELKAEHSKRIASRELADEFTGLITELEKDKSLAMLGACSSGTAYISAHEKAFTTYANSEWKKALTGISPALLRAFLLRIRSLEMSGETSPRATVTRELGDALNLQSALYHFDMEQEPVLSVTGMNRPVITGVDMALLRSPARRMKLVAELAAKDHEQAEG
102830..103018	hypothetical protein	-	N/A	MILTPPAQQHDSLPLSECWHKQTLKTGWPEKGRRKTLLTVCFFTYNYSPLFTLNKKISNTVS
103338..103604	PHAGE_Entero_P4_NC_001609:transcriptional regulator	phage(gi9627517)	2.38e-41	MHTAFSSPYSAPAAPLMPVSDTVHERFIRLPEVMHLCGLSRSTIYDLISREAFPKQISLGGKNVAWAQSEITAWMADRIAERNRGYDA
103958..104152	PHAGE_Entero_P4_NC_001609:Putative CI repressor	phage(gi9627516)	5.38e-31	MATTLTPSHPQFVFVFAAVRRADRTPRICMLRTVAGDEHAARLSLVRDYVLSFAGRLPVAEVRA
104149..104376	FIG01046673:hypothetical protein	-	N/A	MRHTTITARDLECLEHMRNVGQLVGDLMQVQDCATVRRDPAQQLQLTSVIYLMTTQLDGVVERCNQQWLTGEGNV
104373..104693	PHAGE_Entero_P4_NC_001609:hypothetical protein	phage(gi9627513)	5.98e-65	MKKPLPPVLRAALYRRAVACAWLTLCERQHRYPHLTLDALESAIAAELEGFYLRQHGEGKGRQIACALLEDLMEAGPLKAAPSLSFLGLAVMDELCSRHITAPALH
104708..107041	PHAGE_Entero_P4_NC_001609:DNA primase	phage(gi9627512)	0	MKMNVTDTVKQACGHWPRILPALGVKVIKNRHQSCPVCGGSDRFRFDDKEGRGTWFCNQCGAGDGLKLVEKVFGVTPSEAAGKVNAVTGNLPPVVPEVTAAAEAETEADRKAATALAVRLMEKTRPATGNAYLTRKGFPGRECPVLTVMHKTGGVTYRAGDVVVPLYDDSGALVNVQLINADGLKRTLKGGQVKGACHILDGKKEAGKRLWIAEGYATALTVHHLTGETVMVALSSVNLLSLASLARNKYPACQIVLAADRDLNGDGQSKAAAAADACDGVVALPPVFGDWNDAFIQYGEEATWKAIYDAIRPPAQSPFDTMSEAEFTAMSASDKALRVHEHYGEALAVDANGQLLSRYENGIWKNIPAATFSRNVADLFQRLRAPFSSGKIASVVETL…
complement(108082..108438)	PHAGE_Salmon_SSU5_NC_018843:putative repressor of phase 1 flagellin	phage(gi410491531)	4.43e-15	MILASDKPKGNKRIEVKLESLAILEELSGNDAFNLSLMPTDEFNLQQYTPSRRDYFSICNKCYKQGVGIKIYMKYGQVLTGKTTGVNACQVGVRTSNGNHMQVMFDWVSRITSSDYAE
108648..108660	attR	-	N/A	AAAAAGCCCCGAA
Region 3
3002906..3002920	attL	-	N/A	TTATAAAAATGTAGC
complement(3002955..3004295)	PHAGE_Phage_Gifsy_2_NC_010393:bacteriophage integrase	phage(gi169257268)	0	MKSSTLVNAPGRQEGLMANASYPTGVENHGGSLRIWFLYKGKRVRENLGIPDTAKNRKIAGELRSSVCFAIRMGNFNYVEKFPNSPNLARFGQDRKEITVLELTERWSELKRMEISSNTMSRYESIIKNMLPLIGENKMVSAVTTEDLLYVRKELLTGFQVMKKDHRTQVKGRKSSTVNNYMMLMAEIFQFGTDNGYAKENPFSGINRLKKAKGEPDPLTTDEFIRFIQACGHQQMRNLWSLAVYTGMRHGELCGLAWEDIDLHAGTIIVKRNLTQTDEFTLPKTDAGTDRVIYLIQPAIDALRNQAQLTRLGRQFEVEVKLREYGQSVIQPCTFVFSPQCVKRGPRTGYHYAVNSINKIWAPIIKRAGIRYRNAYQSRHTYACWSLSAGANPNFIATQ…
complement(3004292..3004540)	PHAGE_Phage_Gifsy_2_NC_010393:bacteriophage excisionase	phage(gi169257269)	1.4e-55	MSNIIQLTPNKWVSEKVLIAVTGLKPGTITRARKESWMLGREYLHISPDGNPKPSSECIYNREAVDQWIEAQKKNQPGAKTT
complement(3004581..3004820)	PHAGE_Phage_Gifsy_1_NC_010392:hypothetical protein	phage(gi169257264)	1.19e-52	MRLINRSKQSPLGRRACDVALAAHHEKFGDYGRQKHVTNYTVVVDGVKVPVEVVNRATSYVATAMIGVRKLRNLPAQAN
complement(3004863..3005972)	PHAGE_Phage_Gifsy_1_NC_010392:RecT	phage(gi169257263)	0	MENTNIVTTEQQAPNTISASNAIFNVQALGQLTAFANLMADSQVTVPAHLAGKPADCMAIVMQAMQWGMNPYAVAQKTHLVNGVLGYEAQLVNAVIASSSAIHGRFHYRYGGDWERCTRTQEITRDKNGKNGKYTVTERVRGWTDEDEIGLFVQVGAILRGESEITWGEPLYLSGVVTRNSPLWVSNPKQQIAYLGVKYWARLYCPEVILGVYSPDEVEQREEREINPAPVQRMSVQEITSEVSTRTSAQESAANVDAVADDLRERIDTASSVDQAKAIRADIESQKALLGTALFTELKNKAVKRYYQVDAQNKVEAVINSIPNPGEPEAAEMFAKAESTLGAAKRHLGDELHDKYRVTLDDMKPEYIG
complement(3005983..3007623)	PHAGE_Phage_Gifsy_1_NC_010392:bacteriphage exodeoxyribonuclease VIII-like protein	phage(gi169257262)	0	MKTGTSQPTTEPELVKNVGNGIFDVSALMQNSSTHGTETNPEITSNVQVQEADSDENQAGDAVQAGEGDLGTGKEAVTVENQNQAETHQNNDSVSQSEPEAQQNVPESQQEEPEAAWPEYFEPGRYEGVPNEVYHAANGISSTQVKDARVSLMYFNARHVEKTIVKERSPVLDMGNLVHVLALQPENLEAEFSVEPEIPEGAFTTTATLREFIDAHNASLPALLSADDIKALLEEYNATLPSQMPLGASVDETYASYEQLPEEFQRIENGTKHTATAMKACIKEYNATLPAPVKTSGSRDALLEQLAIINPDLVAQEAQKSSPLKVSGTKADLIQAVKSVNPAAVFADELLDAWRENTEGKVLVTRQQLSTALNIQKALLEHPTAGKLLTHPSRAVEVS…
3007735..3007929	hypothetical protein	-	N/A	MQFCPYFXXXXXXXXXXXXXXXXXXXXXXXXXXXXXXXXXXIVVHNSGTFPSTGNTCLYAFTAL
3008055..3008273	hypothetical protein	-	N/A	MIKILTFTYVLSKNAVTEGHSCDNSQLGGWGFCRGRAVAFVTKIFVVVFQHFACFGINTVDDMLARRGGGFR
complement(3009090..3009221)	PHAGE_Phage_Gifsy_1_NC_010392:hypothetical protein	phage(gi169257260)	1.72e-22	MLKQCGYCRKSIDEGKEVKNILLYRNGSQLARKEKEYCSRQCA
complement(3009214..3009330)	PHAGE_Phage_Gifsy_1_NC_010392:hypothetical protein	phage(gi169257259)	2.08e-20	MIDFARKPARQQAVPLNRIEVLIRRLCYLLAQKGDPDA
3010164..3010841	PHAGE_Phage_Gifsy_1_NC_010392:conserved hypothetical bacteriophage protein	phage(gi169257248)	3.22e-145	MNKISTYRKQLGLSQRQFATHLGWTMAHELQLIKQSSGILIPATPETSDILQSKIKLGAVLVAEFRQVRNPAFHRRFFALLNLGFEYWEPTGGAISANERKLVNGYAKFLAAYGGNESALLDAAEQYLEQIANRRVTNGISLCKSFDAYRAWVTVEAGHYDAIQLPDGTLRKHPRSIAFSSMDEVEFQQLYKSALDVLWRWILSRTFRTQREAENAAAQLMSFAG
3011050..3011661	PHAGE_Phage_Gifsy_1_NC_010392:NinG	phage(gi169257246)	6.5e-147	MAKLPRRKCANKECRQWFHPIREGQIVCSYQCASAVGKEQTRKAREAAQRKAQSLQRAAEKKERAAWRQRKAAVKPLKHWIDLTQRAVNDICRETELAEGLGCISCGTKTAFAWHAGHYRSTAAAGHLRFTRFNIHLQCDVCNVYKSGNIEAYRAALVERYGEAAVLALENNNTPHRWTVEELKEIRLAALADLRALKKLEAA
3011658..3011966	hypothetical protein	-	N/A	MKPELIEILRMRWXXXXXXXXXXXXXXXXXXXXXXXXXXXXXXXXXXAQRSPFNGLTIYFCWLTITANGKNFSFGSERRISLSLSVSPRPISVAVIVSQNLR
3012621..3013646	PHAGE_Salmon_SEN34_NC_028699:putative antitermination protein	phage(gi966201477)	0	MCSXXXXXXXXXXXXXXXXXXXXXXXXXXXXXXXXXXRYSACAGCVSEFIDTGDLFLWHTAFFVITSALKQNGSIEMNLESLPKYFSPKSMMPGAVPCGITSDTLTITDVMASLGLLTAKAAVGIELYLAKAGVLSSENIIAYIRLLAEQRAERHGALRKMEEGKRSKFLDTMARYVFRDYSLSAASLVTCSSCHGAKLIDAEVFTNKVTYPDGKPPKWVKDTKGISPSDWEVWKSVREQVRVVCKACDGKGHVKNECRCRGRGEILDKKKSELQGVPVYKKCPRCKGRGYPRLKDTEIFKALGVTEMVWRYNYKLFFDRLVEHCHIEESYAEKVLGNVTR
3014045..3014380	PHAGE_Phage_Gifsy_1_NC_010392:bacteriophage lysis protein; holin	phage(gi169257240)	8.99e-74	MKMNDKTPEFWAAVLTGLKNAWPQILGALMAGLIAYGRLIYDGATRKNKWLEGVLCGALSLCVTSALDVVGLPVSISPFVGGIIGFVGVDKLREIAISALKKRAGVNDENQ
3014367..3014816	PHAGE_Phage_Gifsy_1_NC_010392:bacteriphage lysis protein; endolysin	phage(gi169257239)	1.61e-102	MRISEKGITLIKEFEGCSLTAYPDSGTGGDPWTIGYGWTHSVDGKPVKPGMMIDEATAERLLKTGLVGYENDVSKLVKVKLTQGQFDALVSFAYNLGARTLSSSTLLRKLNAGDYAGAADEFLRWNKAGGKVLNGLTRRREAERALFLS
3014834..3015286	PHAGE_Phage_Gifsy_1_NC_010392:bacteriophage lysis protein; Rz; endopeptidase	phage(gi169257238)	4.8e-106	MFVGLLLVSLIVAGRLANHYRNNAITYKYQRDTATHNLKLANETITDMTKRQRDVAALDAKYTKELADAQNRNTDLQRRLAAGSRVRVEGRCTVPTTTTTKTASTRRVGNAATVELSPVAGQNVLDIRAGIISDQEKLKYLQEYIRTQCK
complement(3015522..3015845)	PHAGE_Phage_Gifsy_1_NC_010392:hypothetical protein	phage(gi169257237)	1.9e-72	MNVEFDKGQNSARYSGVIKGYDYDTYNFQARKGQKVHVSISNEGADTYLFGPGISDSVDLSRYSSELDGNGQYTLPASGKYELRVLQTRNEARKNKAKKYSVNIQIK
3015958..3016164	hypothetical protein	-	N/A	MLYCNNNCSVFSRVLSGNSACYGAAASQDFTPYENFQGKARSVLLIVYFLFLKVFLEKRKDLLDNVFS
3016209..3016754	PHAGE_Phage_Gifsy_1_NC_010392:DNA packaging protein; small terminase subunit; Lambda Nu1 homolog	phage(gi169257236)	1.81e-115	MNVNKKKLAEIFGCDVRTVTAWQSQGLPLVSGGGKGNEAVFDTAAAISWYAERDASIENEKLRKEVDDLRAAAESDLNPGTIDYERYRLTKAQADAQELKNAEREGLVLETELFTYILQRVAQEIAGILSRVPLVLQRKYPDLCQSHIDVVRTEIARASGRAATIADVEKWTDDFRRAQGE
3016726..3018657	PHAGE_Phage_Gifsy_1_NC_010392:DnA packaging protein; large terminase subunit; Lambda gpa homolog	phage(gi169257235)	0	MISGERRANNANRAITNGLIALHIPVPLTTVQWADKYYYLPKESSYTPGKWETLPFQVAIMNAMGYELIRVVNLIKSARVGYTKMLLGVEGYFIEHKSRNSLLFQPTDSSAEDFMKSHVEPTIRDVPVLLELAPWFGRKHRDNTLTLKRFSSGVGFWCLGGAAAKNYREKSVDVVCYDELSSFEPDVEKEGSPTLLGDKRIEGSVWPKSIRGSTPKVKGSCQIEKAANESAHFMRFHVPCPHCGEEQYLKFGDGSTPFGLKWEKSKPETVYYLCEHNGCVIRQSELDQKAGRWICDNTGMWTRDGLAYFSASGEEVPPPRSITFHIWTAYSPFTTWIQIIYDWLDALKDPNGVKTFINTTLGEPYEEAVAEKLSHELLLEKVIHYAAPVPERVVYLTAG…
3018641..3018844	PHAGE_Phage_Gifsy_1_NC_010392:bacteriophage head-to-tail joining protein; adapter between portal and gpFII; Lambda gpW homolog	phage(gi169257234)	4.01e-42	MATITELQEARVALHDLMTGKRVATVQKDGRRVEFTATSVGDLKKYVAELEASLCNGRRRAPVGVRL
3018802..3020421	PHAGE_Phage_Gifsy_1_NC_010392:bacteriophage portal protein; Lambda gpB homolog	phage(gi169257233)	0	MQWSPPGTCGGETVKRTPVLVDVHGTPLRESLGYTGGGIGFGGQMADWMPPAESVDAALLPSLRLGNARADDLVRNNGIAANAVALHKDHIVGHLFLISYRPNWRYLGMRESAAKSFVDEVEAAWTEYCDGIFGEMDAEGKRTFTEFIREGVGVHAFNGEIFLQPVWDAETTQVFRTRFKAVSPKRVDTPGYARGNRQLRAGVETDRNGKALAYHVCDDDWPVAGGERWTRIPRFLPSGRPAMLHIFEPVEDGQTRGANQFYSVMERLKMLDTLQATQLQSAIVKAMYAATIESELDSEKAFEYITAADNKDTPLVNMLANYARYYSTNSIKLGGVKIPHLYPGDELNLQTAQDSDNGFSALEQALLRYIAAGLGVSYEQLSRDYSQVSYSSARASANE…
3020411..3021907	PHAGE_Phage_Gifsy_1_NC_010392:bacteriophage prohead protease: Lambda gpC homolog	phage(gi169257232)	0	MQRNLPHIISQATSAPLLLEPAYARVFFCALGRESGINSLHIPGNNESLDQSDMALVTGDFMATGKPQARFYQVVNGIAVLPVTGTLVHKLGGMRPFSGMTGYDGVTARLQQAVSDPEVKGILLDIDSPGGQAAGAFDCADMIYRMREQKPVWALANETACSAAMLLAAACSHRLVTQTSRMGSIGVVMAHTSYAEKLKQEGIDITLIYSGAHKADLTPSQKLPESVHADYQQRMDEARKMFAEKVARYTGLSVDAVMATEAAVYDGQAIITTGLADGMVNAADAIGVMAEAINSNKTGGTMPELSAADAVTQENQRVMGILGCPEARGHEALAQMLAGQPGMSVAQAKSILAAAAPTDTTSTADRILALEEAGGRETLAQTLAAMPEMTVEQARTILA…
3021920..3022267	PHAGE_Phage_Gifsy_1_NC_010392:bacteriophage head decoration protein; Lambda gpD homog	phage(gi169257231)	2.18e-78	MSFTTTIEKRADNRIFAGNDPAHTATGVSGITAATPMLTPLMLDDTTGKLVAWDGQKAGTAVGVLALELDGSENLLTYWKSGTFATESLAWPKSVDAIKQANAFAGSAVSHAALP
3022322..3023350	PHAGE_Phage_Gifsy_1_NC_010392:bacteriophage major capsid protein; Lambda gpE homolog	phage(gi169257230)	0	MGLFTTRQLLGYTEQKVKFNPLFLSLFFRRTVTFPTQEVMLDKITGKTPIAAYVSPVVGGKVLRNRGGETRVLRPGYVKPKHEVNYAQVVERLPGEDPARLNDPAYRRLRILTDNLKQEEKAIVQVEEMQAVSAVLNGKYTMQGEQFDTVEVDFGRSAGNNIIQATGKKWSEQDRETFDPTYDLDMYCDQASGLINIAVMDGKVWRLLNGFKLFREKLDTRRGSNSQLETAVKDLGAVVSFKGYYGDLAIVVAKTSYVADNGTEKRYLPEGTLVLGNTAAEGIRCYGAIQDSQALAEGIVAATRYPKHWLTVGDPANEYTMTQSAPLMVLPDPDEFVIVTVG
3023408..3023773	PHAGE_Phage_Gifsy_1_NC_010392:bacteriophage accessory DNA packaging protein; Lambda FI homolog	phage(gi169257229)	3.55e-77	MATKEENIQRLRELATRLGRDPDVSGSAAELSQRVMEWEEEAEAEAEHLPAVENDSDESIVPPGIGQRSERVLIRALRTLHICAIDPDSNRELDMVMAGKPARISQHDVDELIAAGLIIEL
3024148..3024726	PHAGE_Phage_Gifsy_1_NC_010392:bacteriophage head-tail assembly protein; Lambda gpZ homolog	phage(gi169257227)	9.02e-136	MKGLENAIRNLNSLDRQMVPRASIWAVNRVAQKAVSVATRKVARETVAGDNQVRGLPLKLVRQRVRLFKAGTDGKRSARIRINRGNLPAIKLGAAQVRMSKRRGKLLYRGSVLKIGPYLFRDAFIQQLANGRWHVMRRVNGKNRYPIDVVKIPLSGPLTQAFESATQSLIDEEIPKQLGYALKQQLRLYLSR
3024969..3025124	PHAGE_Phage_Gifsy_1_NC_010392:bacteriophage tail shaft stabilization protein; Lambda gpU homolog	phage(gi169257225)	1.36e-30	MEEKIFPALEEVSGLERLIDTMTPLGYDYQRDSEMATWGMAEITYRITYTN
3025135..3025878	PHAGE_Phage_Gifsy_1_NC_010392:bacteriophage major tail subunit; Lambda gpV homolog	phage(gi169257224)	2.12e-173	MGTPNPLVKTKGAGTTFWLYTGSGDAFKNPLADDDWLRLAGIKDLQPGEMSADAEDDDYLDDENADWKSTTQGQKSVGDTTATLAWKPGEAGQKKLVELFDTGEVRAFRIRYPNGTVDVFRGWLSSLGKTVTSKEVMTRSVKITGVGRPSLAEEDTPDVVSVSGVTVAPASATVAAGATTTLTFTVKPDNASDKTLQVATADPLIATVTLKDNVATVKGVKAGSVNIVGISSDGSLVAVAAVTVTAS
3025929..3026324	PHAGE_Phage_Gifsy_1_NC_010392:bacteriophage tail assembly chaperone; Lambda gpG homolog	phage(gi169257223)	2.16e-93	MFLNTDTFNYGGHSIVLSELSALQRVDYLKFIQQRTADYDAQPETLTEAERQTEFMQMGVDINAWLVSRSLCESKKEEEARALYESVRLEWSYEALGRGADMVLSLSGMRLPASQEDDSGSEKDTTTPEKS
3026387..3026659	PHAGE_Phage_Gifsy_1_NC_010392:part of bacteriophage tail assembly chaperone gpG by translation frameshift lambda gpT homolog	phage(gi169257222)	2.9e-59	MLAEMSATELGEWAEHFGKNSFSDMLLDAEFATLKSLISGLVTGTHHDAEMFSLITDPESLHEKTDDELMILGEGITGGVRYGPDSEPGH
3026631..3029726	PHAGE_Phage_Gifsy_1_NC_010392:bacteriophage tail tape measure protein; minor tail protein; lambda gpH homolog	phage(gi169257221)	0	MDQIANLVIDLSIDSAEFRNEVPRIKKLLNDAAGDSERSAARMQRFLDKQTEATRRTSASLEQVTASSAAYSSAVEKSAAASTRLAADVDQTRQRVEALGRKLREEQAQSAAVAAAQDRTSAAFYRQIDSVKQLSGGLQELQRIQAQVRQAKGRGDISQGDYLALVSETARKTRELTDAEALATQKKAQFIRRLKEQTTVQGLSRTELLRVKAAELGVSSAADIYIRKLERTGTATHTLGLKSAAARRELGVLAGELARGNFGALRGSGITLANRAGWIEQLMSPKGMMLGGLAGGVAAAVYGLGKAYYEGAKESETFNKQLILTGSYAGKTTGQLNAMAKSLAGNGVTQHDAAGVLAQVVGSGAFTGQAVAMVSRTATRMQENVGQSVDETIRQFKRL…
3030068..3030766	PHAGE_Phage_Gifsy_1_NC_010392:bacteriophage tail tip assembly protein, lambda gpL homolog	phage(gi169257219)	9.25e-171	MQDISQDTLNEAAKLAQSARITLWEIDLTQSGGDRYFFCNEANEKGEAVTWQGQKYDVYPVEGSGFEMNGKGAAARPSLKVSNLYGMVTGMVEDLHSLVGATVIRRIVYARFLDAVNFQSGNQEADPEQESVSRWVIEQCSDLTAVSATFVLATPTETDGCVFPGRIMLANTCTWIYRSDECGYTGPAVADEFDNPTADPAKDACSRCARGCALRNNTGNFGGFLSINKLSQ
3030875..3031510	PHAGE_Phage_Gifsy_1_NC_010392:bacteriophage tail tip assembly protein, lambda gpK homolog	phage(gi169257218)	2.53e-144	MNISAAPEDYFRMAPEDWLRAETQGDIVALVHSHPGGQPYLSDVDRRLQVQSDLPWWLVCADQVHKFRCVPHLTGRQFKHGVFDCYTLFRDAYHLAGIDMPDFHRDDDWWRHGDNLYLDNLETTGFYRVSAASAQPGDVLICCFGSSVPNHAAIYCGDGELLHHIPEQLSKRERYTDKWQRRTHSIWRHRAWREFAFTGICNDFAAASACR
3031549..3032055	PHAGE_Phage_Gifsy_1_NC_010392:bacteriophage tail tip assembly protein, lambda gpI homolog	phage(gi169257217)	1.45e-116	MPGLRQKLNDGWYQVRIAGDDVTADTLTTSLHDPLPPGAVIHIVPRLAGAKSGGVFQAVLGAALIAVAWWNPAGWLGAAAVSGMYMTGASMILGGMAQMLAPKPKMSEMRQTDNGRQNTYFSSLDNMVANGNMLPVLYGEMQVGSRVISQEVSTADEGDGGQVVVIGR
3032117..3035479	PHAGE_Phage_Gifsy_1_NC_010392:bacteriophage host specificity protein; tail fiber; Lambda gpJ homog	phage(gi169257216)	0	MGKGGGKGHTPREAPDNLKSTQLLSVIDAISEGPIEGPVNGLHSVLVNQTPVVDRDGNTNIHGVKVVYRVGEQEQTPLEGFESSGAETVLGVQVKYDNPVTRTITAANIDRLRFTFGVQSLVEANSKGDRNPTSVRLQIHLERYGQWVVEKEITITGKTTTQYLASVIVDNLPPRPFGIRMVRVTADSTTDQLQNNTVWSSYTEIIDVRQRYPNTAVIGLQVESEQFGSQQVTRNYHFFGRIIHVPSNYDPVARTYSGIWDGTFKPAYSNNPAWCLWDVLTHPRYGMGQRIGAADVDRWALYAIGQYCDQMVPDGFGGTEPRMTFNAYLAQQRKAWDVLTDFCSAMRCMPVWNGQMMTFVQDRPSDTVWTYTRSNVVMPDEGTPFRYSFSARKDRHNAV…
3035518..3035760	PHAGE_Phage_Gifsy_1_NC_010392:hypothetical protein	phage(gi169257215)	5.66e-52	MTMSRVISLAAGLSLSVLFSTAAVADNGRGSGNSNIENQTRIYTGTDRGQKQHREAKGKTITRSVQCSLPAYLRDPDNQC
3035814..3038015	PHAGE_Salmon_RE_2010_NC_019488:tail fiber protein	phage(gi418489713)	0	MPVLISGVLKDGTGTPIQNCTIQLKASRTSTTVVVNTVASENPDDAGRYSMDVEQGQYTVTLLVEGYPPSHAGVITVYDDSKPGTLNDFLGAMTEDDVRPEALRRFEAMVEEVARQASEASRNATVAGQASEQAQTSAARAGASETAAKTSETQAASSAGDAGASVTAAAASEKAAAASAAAAKTSETNAATSASTAAASATAASSSASEASTHAAASDTSASLAAQSSTAAGAAATRAEDAAKRAEDIADVISLEDASLTKKGIVKLSSATDSDSEALAATPKAVKAVMIEAQTKAPLDSPALTGTPTAPTPETTAAGIEIATAAFVAAKVAQLVGSAPEALDTLQELADALGNDPNFATTVLNKLAGKQPLDETLTALSGKSVDGLIEYVGLRETIS…
3038015..3038596	PHAGE_Phage_Gifsy_2_NC_010393:bacteriophage side tail fiber assembly protein; Lambda gpTfa analog	phage(gi169257321)	3.51e-134	MTFKMSEQAQTIKIFNLRSDTNEFIGAGDAYIPPHTGLPANCTDIAPPDIPASHIAIFDAETQTWSLHEDHRGEMVYDTTTGNQVYISAPGPLPENVTSVSPGGEYQKWDSKAKVWVKDEAAEKAAQLRQAEETKNRLLQIASEKIAPLQDAVDLDIATDDEKAQLDEWKKYRILVNRVDTTNPDWPEVPVNQ
3043272..3043286	attR	-	N/A	TTATAAAAATGTAGC
Region 4
3865424..3865435	attL	-	N/A	GTTTTTTCTTTT
complement(3876325..3876453)	PROPHAGE_Salmon_LT2:phage-tail assembly-like protein	phage(gi16765208)	6.35e-22	MDLDEATNKEKASLLAWRKYRVQVNRVDTLKPVWPEKPASSL
3876431..3876769	hypothetical protein	MVASSRSTASCNGAXXXXXXXXXXXXXXXXXXXXXXXXXXXXXXXXXXRLLCRKPSRRGDPPADSTFGFQRQKQQYDWREYQEGLYQYNLPGDAVRGGPDHIRPPLQVMQQM
3876970..3877440	hypothetical protein	MIFCCTRSCNCDPKYAVIAASTPPSIRPKVSALPSXXXXXXXXXXXXXXXXXXXXXXXXXXXXXXXXXXTLYNRHSPFVLGHLLLEWQRHPIEANQAAMVNTPGGDARCGGHHIIKLGLAEIWPHLFNAARQYRVNHPAVERENTLKLAFTNGFEP
complement(3877833..3879098)	PHAGE_Edward_GF_2_NC_026611:putative terminase large subunit	phage(gi764162249)	0	MANKYSLRFCCARQIQNKIEESVYTLLKIQIDRFGLRHRFRILNNKIINRVTGSEFVFYGLWRNIEEIKSLEGIDVLWLEEAHALTEYQWKILEPTIRKEGSECWFIFNPGLVTDFVWRNFVVDPPEDTLIRKINYDENPFLSDTMLKVIDAARRRDPEGFVHVYEGVPESDDDAAIIKLSWIEAAVDAHKVLDFGPEGRKRIGFDVADSGADKCANVYRYGSVIYWADEWKAKEDELLKSCQRTYQAAMERDADIVYDSIGVGASAGAKFSEINDDRKRENAYARRVNYQRFNAGAGVHEPDDEYNGIPNKDFFANLKAQAWWLVADRFRNTFNAINNGEQYLVDELISIDSRCPLLEKLKLELTTPHRDFDRNGRVMVESKKDLAKRDIPSPNVADA…
complement(3879202..3879954)	PHAGE_Salmon_SEN34_NC_028699:terminase small subunit	phage(gi966201418)	2.14e-16	MAKPDWEAIETAYRAGIMSLRDIGALYGVTEGAIRKKAKKLEWVRKNSTQVRKNGTQKNTVRTTRRPASSGAVQKHSRPESGPPADTKPEAVRKKVVTNHPPFQPGNQYALKHGGYARRLLLKDEVVEDARALTLEDELFRLRANNLMAAENIGRWFTLLEDAEEEQQRKILMDNISAAEKAMMRNTVRIESIVGTLATVSKIHADTDYRLAATDKVSLEADRLRRDAGIDDGNGERDLNDFYADIQTDA
complement(3880368..3880745)	PHAGE_Klebsi_phiKO2_NC_005857:Gp63	phage(gi46402149)	6.05e-59	MFTVKTIINGVTHICEQPSISIARAGSETFADTLKLTHNSASPDFAYWLPAIYEDPEMTKALQEEELVISDRTDVLDTDAIAIIIEEYPSENFPGAGDGCRYQFIYPGDQVYVMNSHGSTIETVK
complement(3880788..3881327)	PROPHAGE_Salmon_LT2:phage-tail assembly-like protein	phage(gi16765210)	3.23e-97	MNLLSALLKRYWLQLVFILLMAGAFIAGNVWSDRGWQKKWADRDSAESSQEVNAQTAARIIEQGRVIARDEAVKDAQAQAAKSAATAAGLSATVSQLRTEAKKLATRLDAAKHTANLAAAVRSKTAGADATVLADMFGSLAEEAQYYAERSDESYRAGMTCERIYNSVRESTNNPIAPH
complement(3881381..3881938)	PHAGE_Salmon_Fels_1_NC_010391:putative bacteriophage endolysin	phage(gi169257182)	4.41e-131	MNQQQFQQAAGISAGLSARWYPYITAAMSEFGITAPLDQAMFIAQAGHESAGFTVLKESFNYSVEALKKTFGKRLTPYQCEMLGRIDGRQVAHQPQIANLVYGGRMGNKDAGDGWKYRGRGLIQITGLENYTRCGVALKLDLVANPGQLELERHAARSAAWLFVTKGCLKYSGDLVRVTQIINGG
complement(3881938..3882219)	PHAGE_Entero_mEp390_NC_019721:putative holin	phage(gi428782713)	2.3e-49	MVANDPSAVLNAVICGVIVIVLMFYRRGDATHRPLISLLAYVMVLVYASVPFRFVFGLYESSHWLVVMVNILICAAVLWARGNVARLVDALRH
complement(3882206..3882550)	PHAGE_Entero_mEp390_NC_019721:putative holin	phage(gi428782712)	7.33e-48	MGASVFGLATGTDYGVVFGAFAGSVFYVATATNIGRIRLVAYFITSFIVGVLGAGLIGTKLAAITHYEKPLDALGAVIISAMCIKFLTFLNSQDLNTLFSILSRIRGGGSDGSK
complement(3882596..3883597)	PHAGE_Salmon_Fels_1_NC_010391:putative bacteriophage tail fiber protein; Lambda gpN homolog	phage(gi169257204)	0	MPETTAAGIEIATAAFVVAKVAQLVGSAPEALDTLQELADALGNDPNFAITVLNKLAGKQPLDETLTALSGKSADGFIEYISLRETINHAADALHKSQNGGDIPEKPLFVQNIGALPASGTAVAANRLASRGALPALTGTTRGSDSGLIMGEVYNNGYPTQYGNILRLTGTGDGEILIGWSGTNGAPAPAYIRSHRDTAEAEWSEWAMLYTTLNPPPDSHPVGAPIAWPSDATPAGYALMQGQSFDKSAYPLLAIAYPSGVIPDMRGWTIKGKPASGRAILSQEMDGNKSHSHSARAQDTDLGTKTTSSFDYYAGGYLLFPLITERTHTTRGG
complement(3883569..3884030)	PHAGE_Salmon_Fels_1_NC_010391:bacteriophage terminase, large subunit	phage(gi169257185)	1.57e-81	MFRDGSFLQIGWPSITVFSSSDYKRVALTDYDRFPEDIDGEGDGFSLASKRTTTFMSAGMTLAESSSGREITDVKWRRSSPHEAPPTTGILSLYNRGDRRRWYWPCPHCGDWFQPAMENMVGYGGGTDQSPAGQSGTDRYANGTNAGNHSCRY
complement(3884216..3884707)	PHAGE_Salmon_Fels_1_NC_010391:bacteriophage terminase, small subunit	phage(gi169257184)	3.1e-111	MDGELKNLKCNICQLAAITGLHRQTVVSRLSGVPLALGSNEKNKLYLLTDVIRVLMETPVSQAAEHQDPNKMTPKERKNWFDSEKGRLWLEKEMKQVVPLSEVRQQMAAIVKAITQVLEVWPDKLERDKGWSADQLNEAQDVVDEVRILLVKAIQETADDDGE
3884828..3884950	FIG01046582:hypothetical protein	-	N/A	MMMMHEKSKMRQIPRRCRPVADRPAGSTFLKYEQLSTTTT
3885015..3885182	lytic enzyme	-	N/A	MKNIITIIVAIIIVFYAGMWSQKFLMEDECLDSGGSYNENGICNIAGSHQDVPPK
3885535..3885717	hypothetical protein	-	N/A	MFSFFCNISEHVGKHSGVGVGCFAXXXXXXXXXXXXXXXXXXXXXXXXXXXXXXXXXXTL
3886193..3886450	FIG01046362:hypothetical protein	-	N/A	MEQDTTEHHPDPQPLENEPPVSQTEAGYQKIRAELXXXXXXXXXXXXXXXXXXXXXXXXXXXXXXXXXXQSVMALTECIAGEVDQ
3886447..3887424	PHAGE_Entero_HK022_NC_002166:integrase	phage(gi9634144)	3.32e-70	MSRKKYDANLPRYLTYRKASKSFFWRNPVTDKEFPLGQIARRDAITQAIEANNFIAQNHTPVALIEKLKGTDSFTVSAWIDRYEVLLQRRSLSVNAYKIRSNQLATVREKMGEIILAEVTTRHIAKFLESWITEGKNTMAGAMRSVLSDMFREAIVEGHIVKNPVEATRIPEIKVARERLQLETYNATRAAAEHMPAWFPLAMDLALVTGQRREDIVNMKFSDVFDNRLYVTQIKTGMKIAIPLSLTLRATGLRLGTVIDRCRLVSRTDFMISAGIRKNSPTGNIHPDGLTKTFVKARKASGVNFSPGKWLLGESRALKVGINAG
complement(3887398..3887514)	hypothetical protein	-	N/A	MTDKTPGFFNHLRRKLENLASSSILKGQGDLACINANF
complement(3887575..3887928)	PHAGE_Salmon_SEN1_NC_029003:hypothetical protein	phage(gi971764937)	9.49e-11	MKKILLPALLLATLGVALAAPQVITVSRFEVGKDKWAFNREEVMLTCRPGQALYVINPSTLVQYPLNAIAEQQVAEGKTRAQPIAVIQIDNPAKPGEKMSLAPFIERAEKLCDPSNS
complement(3887945..3888766)	Copper resistance protein D	-	N/A	MLVYGCALYGAWLAPASIRRLMTRRFLHLQRHAAAWSVISAAFMLAIQGGLMGGGWPDVFSVSVWGAVLQTRFGAVWIWQIILALVTLAVVVIAPVKMQRRLLILTVAQFILLAGVGHATMRDGVVGTLQQINHALHLLCAAAWFGGLLPVVYCMRMAQGRWRQHAISAMMRFSRYGHFFVAGVLLTGIGNTLFITGFTAIWQTTYGQLLLLKCALVVLMVAIALTNRYVLVPRMRQENPRTDLWFVRMTQIEWGVGGIVLAIVSLFATLEPF
complement(3888821..3889195)	Copper resistance protein CopC	-	N/A	MASSAPSRRLALLLLASTFATPAAWAHAHLTHQYPAANAAVTASPQALTLNFSEGIEPGFSGATITGPQQELIKTRPAKRNEQDKTQLIIPLEQPLKSGAYTVDWHVVSVDGHKTKGKYTFSVK
3889333..3889563	PHAGE_Pectob_ZF40_NC_019522:putative DNA polymerase	phage(gi422936677)	7.33e-23	MKTNLAQLEQAEMDKVNVDLAAAGVAFKERYNMPVVAEAVEREQPEHLRAWFRERLIAHRLASVSLSRLPYEPKVK
3889671..3890327	Putative amidohydrolase	-	N/A	MSSWKIAAAQYAPLNASPAEHVAHHLEYIELAARQQCELLVFPSLSLLGCDERNKSLPAPPDEALLQPLTHAADTHHMTIIVGMPVEHNCRFVKGIAIFAPWLASPLMFHKSHGACIARQRSAINVVDEQPEGGDIDPSFTLFTTSQCLNEPELHASTSRLQRFSHKYALAVLMANACGSSALWDESGQLIVRADCGSLLLTGLRTTEGWQGDIIPLR
3890351..3891049	PHAGE_Pseudo_H101_NC_029094:exodeoxyribonuclease X	phage(gi985760125)	3.74e-19	MLRIIDTETCGLQGGIVEIASVDVIDGNIVNPMSHLIRPDRPITPQAMAIHRITEAMVADKPWIEDVIPLYYGSEWYVAHNASFDRRVLPELPGEWICTMKLSRRLWPGIKYSNMALYKSRKLSVQTPPGLHHHRALYDCYITAALLIDIMRTTGWTAEEMVNITGRPALLTTFSFGKYRGKAVSEVAKRDPGYLRWLFNNLDNMSPELRLTLKHYLDDVQAGEQRSNGTPQ
3893141..3893152	attR	-	N/A	GTTTTTTCTTTT
Region 5
complement(4088253..4088444)	PHAGE_Salmon_SEN34_NC_028699:hypothetical protein	phage(gi966201447)	6.2e-25	MDEEKQAVFDDICRVIGRAVVMLKETNQPVTKNSINLMLQAHSDQSDDAYLSRIYAVAKDVME
complement(4088553..4088987)	hypothetical protein	-	N/A	MYYSENEKIEKKRQKIANKNKQTSVKKGDLFYCRMTLNQSGGPVDTSRMRVRVKDNVDSVGFLFPDDKQIISPKLEVVDSDSGERYGRAADGSITVSASYDGHAYEIQIFNTLPVSQFNGAVVTHTSALEFAGSIDVFDCKKVK
4089315..4089326	attL	-	N/A	CACCATCATCAC
complement(4089343..4089486)	PHAGE_Salmon_SEN5_NC_028701:tail fibers protein	phage(gi966201576)	6.85e-13	MGKNVATDDEKAQLDEWKKYRVLVNRVDTSTATKIDWPKKPEQPRTL
complement(4089461..4089667)	PHAGE_Pseudo_Lu11_NC_017972:putative tail assembly protein	phage(gi388684690)	4.96e-09	MPPDGKYSKTAIIHNWIYDNALRTKKEADLILLDRMTVLGVPKWKRIVMHLAVRWFGRGMYGKERCNR
4089887..4091020	PHAGE_Escher_TL_2011b_NC_019445:hypothetical protein	phage(gi418487678)	2.37e-14	MRTKLHSLQALRGIAALLVVLFHYRGFLNDGAKGNPTIWDKVFSPGIIGVDIFFIISGFIMVYTTWSYMRGKASLVRFLLNRVIRIIPLYYLCLVIAFLLEGAMSTFHYPDKVQNILSALTFTLYKTSTPPLYIDDGGTYNIRWTLNYEIYFYLVFALCLLVKHRVLALVTWGVLVTSIIPVIAGYQPTINVQGYPFSSPYFGFLTNPLLLEFIIGVIVGWLYIKIKQNFPSRKIELLSGISAIVLLIYIIWGIYTGNIHALDRKSSLVLGFFVLALTLGESLLLAFIPRFLTYVGNISFSLYLLHSAVGLAVVKRVGAVGYSDFKMIPSVLLAIGISILAAHFTHKYIEINLTQRIKNKLKQKNLLKNPLPYGSLQ
complement(4091096..4091269)	putative phage gene	-	N/A	MWREARLAFTDSLAALDCSVVPAHPWIHGLGQQTDNWAGMMQAMVFRDLKSMGANCK
complement(4091259..4091834)	PHAGE_Salmon_ST64B_NC_004313:probable tail fiber assembly protein	phage(gi23505469)	6e-131	MKKYQDIKNFRLIDAPVNRGKTQAEINIGAYFLESEDGQDWYECQSLFSDDTAKIMYDPEGVVWGVVNKPVPQRGNTYAVSMLWPVNMSVAEIDAADCPDDCRGDGTWLYQDGKVVQRGYSPEELRKKAEAEKIRRLSEAESAIAPLARAVKLKIATDEEIKRLEAWELYSVMVNRVDTASPDWPEVPDVA
complement(4091834..4093885)	PHAGE_Salmon_ST64B_NC_004313:tail protein	phage(gi23505468)	0	MIIGFGNNVVSSLAADITASQTTIQVMPGAGAMFANLLTSDYANSSNPLKTYAKITLTDAKETVFEVCHLTAVNNDMLTVIRGQEGTTAKGWSLNDVIANFATRGSENQFVQIEELQSGHYVAGVAGGTENNLTLELPATYFVNGGVDWTLRTPLVVIPALNNTGASTLQLTMGGRVLGKFPLYKGNKAELSANDIIKDAPVLCVLDNTKTYFSVLNPLEIYLGSRYLQKDQNLADVNDKAQARQSLQLGDSATRNVGTTQGTVAAGDDSRITGALQKSQNGGDIPDKKQFARTIGAVTSTNITFNNASGWYKIATVVMPQATSTAVIKLYGGAGFNVGLFEQAAISELVLRAGNGSPVGITATLWRRSPTSANEVAWVNTSGDTYDIYINIGQHAHWL…
complement(4093882..4094508)	FIG01046508:hypothetical protein	-	N/A	MAALLESIIPAYPYTQYNDDPDIVAFFDAYNKLAQGYLDYFNNLNLPCWTSPAITGELLDWIAAGIYGESRPLLQISEDAIARGAYNTIEYNNVAYAKLRNYVPGSASYVPDDYFKRILTWNFYKGDGSHFCINWFKRRLARFIHGANGIDPPVQSTFDISVMPDKGIFFVSIPDYGDGVGHFLKDAIDQSLVKLPFIYTYSVTVVEQ
complement(4094492..4095718)	PHAGE_Vibrio_CP_T1_NC_019457:putative baseplate protein	phage(gi418489249)	1.59e-06	MSDLPISYDIAGPVPKTTDELRQLVIDTATALSPGITTNLPGSLIEDMVSTSVGALVVCDQARVDLINSCSPYAANVHLLAQLGDMYGVQKGQGTNTSVYVVFSGPPGFAIPKGFMVGDGTYTYTVQRDTMLPESGQTEPVYCLATTGGSWAVPAGTVNQIKTSVPNTYNLTCTNLTAGLPGAQEQTFSSYRAQVFQAGMYGVQGTPDCYRIELKNVYGVQENLISYRQASLGAWVAIAGGGDPYEVAYAIYKAVPDISVLTNDVVNPSGAAVDKKTIPIIVYPDTYHVPFVVPSSQNVTLLITWNTASTSYIDPTGIEKAVQQSIADYINGIATGEPINIFLIRDIFLNQVKGLVSSNLVSMIDIQVGINGKIVPPATDSSLVYGDTYAYFSTSSSQI…
complement(4095715..4096047)	FIG01047481:hypothetical protein	-	N/A	MRTYGRDKDGKWVTVTTDENGFNDSVYLTTLVQNLKLSPQESPFFANHGIPANGSVIQQILPTFYVNRLQQQFSKYFSSLQIALADVDPPVYNISSITNSGSKIVAQVYV
complement(4096044..4096760)	FIG01046179:hypothetical protein	-	N/A	MSINKKLNFGGNMNNFADQKIAAAMQMAGKILPAEVVSQSGKMVTVTFLLRDIPYTLPQLTIPLFGPQYIRYPMQKGDKGIVIPADTYLGGASGLGGGTADLTPPANLSALVFLPISNTEWENVDGQVLTLYGPEGVTIRDAKSNTTFLLTPESITIATPEKFEVTVGSTVLTLTAGTWSLTGQSGTLTDSAASTSPKIMLEGWEKLVQWVNSHRHSNGNDGQDTGGPTSQFNGSITE
complement(4096757..4097800)	FIG01047866:hypothetical protein	-	N/A	MRFYDIQIFNASDAKGNPGTLYRQYSSMKNGVFNPGCLMVEFDLLRFGESTPKGQSCITVWGISPQEMQQARQDMFGMTIKMWVGMSKGLPLAKPEQRGLVLEGTIWQVLGNWQGTELRLDLIVTAGPVSDVNPLPLAPVNLTVPWNKGVKLSVALTQCFQTLGGDYRFSVSISDRLVNNYDSNMFCGSLQELATRLNSLSKSIIKDSNYSGVEIAMVNGREIRVFDNDFANHQDKDSKKSASYRSKNPVQIEFTDLVGQPTWIQFGTVSIPCVMRSDIQVGDYIRMPKKLRPMIQASSYSQFRDDSAFTGDFLVSSVRLVGNSRQPDANSWVTVIEAHPTGGIAAT
complement(4097800..4098075)	FIG01047636:hypothetical protein	-	N/A	MSMAYYPFSGNEQKSMVFTPVLDGEVYNCQTKWNIAAQRWYLNITDNSGRRQLTIPVIGSPKNYDINLLVGAFSKTRMVWRVSDGQIEVFN
complement(4098072..4098788)	hypothetical protein	-	N/A	MSFTRELYKLGFEISPVILCDGVAQSIPGGMLPIVALTQSASYVSGLMGGAIELTDLDKYFCHWRAAPGGTMVDYDIGRYPFANQAVAANALLSQPLRIPMLMDAPVNENTGAMTKLVTLSSLQAVLQAHASLGGTFIVATPGIIYSNCILRTVRDVTGSNDALPQRQWLWDFEQPLLSETGAEQAINSYLGKIDNGDKATESAWTSTISAIGNTSLGSSVSGAVIGLIGKLSGAFNL
complement(4098788..4100842)	PHAGE_Citrob_CR44b_NC_023576:predicted internal virion protein D	phage(gi589286988)	3.51e-17	MAAKSIVEIDVQDEKFQSFLEKFNEYQKALGELPEQWRGAVHGLGEAAKETERVRDGTEGITKAFADGVAALASVNDGLDRLNGNLEKATKTQTEFNKKSGGARNFLNKASKDAKSLAGHIKDATTSLLSWGTVLGLFSGLAGAGGLWGLNHLAGNASAQRFTAMGLGTTAGGLNSTAVDFQKALGNPVGTLGAIRDAQLDLSKRWQFRAMGVDNPDRDPAELLPEMIKAARDIFVRNGSTQQGAEAYGLTNYFTLDDLNRFKKMSDEEIDAMAKQAQQDTRRLQLTDQQLRQWQDFNIQLDRSKVSIGNTFIRGLAPLAPELGKLSDAFSGAIETVLKSPELGKWIDGLSDGIRRFGNYLASPEFQKDVEAFISGVERLGRVIGKVIDWISGKSDITT…
4100826..4100957	hypothetical protein	-	N/A	MDLAAIEIPLASYFLQNEPLPEMERAFIFTAAQFTTEVTEAFA
complement(4100966..4101553)	FIG01046364:hypothetical protein	-	N/A	MAVKIDRKLNFVSTITRDDGSLVYLHIVPFPYEVVEENCVLLGNLFNNFFSLVGSVGAPRVAAMMLRKIIKARQEAGDLQPGTPNIVDEIQRLTTVIWNDNGTWKTSSLEAAFRQEIITDDEYREVEGEVVFFMVSSAIQKANLIAPTVGKALDMYSGQLVSLSAMAYRDSLPTSKTATDTPTPEALPEPSHIPS
complement(4101553..4101939)	FIG01049053:hypothetical protein	-	N/A	MTVTDIPALNVTASFLGKDAISMRPDSAATDIIPTLTGTVGSQVPYQQVTITMHLLRTQGLAASYQNRFASDTSLGEVVITPDASTFGNYTVLNAYLVNFNELTINGMDAGYVVTISGYLITNDKMWG
complement(4101994..4103388)	FIG01048529:hypothetical protein	-	N/A	MAIVNINVSVTSPPKPSQLLKSGALVSTGGTTLAAGSYQLLTSKDDLKNIVAPAKAISSLAWAGNTVTVTLSENHGWSIDETIPVVISGAAPAAYNGAYTASVTGEKTFTYPLNSDPGTATVTGTVTSVAAGELQQMNTTYWAQGTSRAVYVLELGEMNVKSAVAALGTFIDEDTSLGNTYQKFFSYLVPREWDAEPTFKTLANNYTSPGALVKFFVTTTIATYQEWVSGKYPNVFAGVEAPSIGATEFSMAAPFQSSLANDPGSSNMVPPMAYRFMYGVTEYPPAGNGTLLKTLQDNHINYIGTAAEGGLSNKMLVAGHMLDGMPFNYWYSVAWCAINLELDLANEVINGSNTTVNPLYYDQQGIGRLQRRALKTLRSGISYGLILGQVIDTQLTQES…
complement(4103394..4104335)	FIG01045937:hypothetical protein	-	N/A	MPSLSELQQNAKTELNAALTQGLDDLSRFQVVTFTKYIRKVLPLDGFVFWVKASVLSDNPGNEPDTVNVKGYLHLTTETIQDDEQLYDRNVVTFTAQADIDPFNDIGSDVLYIGEFFGIQFSFSRRTGLNEPANLYHYTGEAIYPHMRSQIINSADDIDLSDVVVSSSLPVWLGLSQFMPMFPAMLSTQNLSPPFATIRCSNVSPIAGAFYIDERDNQYQLVSEDVTISITGLRNAVVEDFLRYVQQYTLRDDAEMGVMNIPVIQDERVTQNELNIIAMRKKVKFKVNYYQQRMRNVARRLITSAIPSIYVEK
complement(4104319..4104753)	FIG01048991:hypothetical protein	-	N/A	MITFHLGVIDIPYEDENTTTGDVAEYLEEKYQIMQTFFDRYGNDIADLMSKDLAANLENMLAGAPPLRDPLAESMSRVHDLFVAFLDNEEMNGMSGVPTRRALLGISKRFKNKKGDPRASFIDTGNYQAAMRAWVSGVLNAFPE
complement(4104750..4105178)	FIG01048628:hypothetical protein	-	N/A	MSVNLAAFIIFVRTDMGVTASQVPYDSPSFVVAYNAAVEWVNRDIELVMPSLYEVAVYNLGASFLVNYGTESVFAEFRKEYGLNDFKAGVITGAGDNSTSAQRLVPDFFKDLSLADLQMLQDPWGRRYLMIAQQFGSLWGLS
complement(4105175..4105657)	FIG01047216:hypothetical protein	-	N/A	MKLYIANTTKQRHIFTYRKLETGRLVQIPIEHGAQMMVLDGSTEEVDAVIQHHRVYGLVDSTKIDQSKDFVGLCYSINKPVSASVIEKTIRDNDVHLTRNAHNLRQASIIAHDSTLRNSGTGYDGDMEFSVEQARGRDESDETQVVNETIVTPKAGNKKK
complement(4105726..4106757)	FIG01048949:hypothetical protein	-	N/A	MAAITPSYTIVNPSYIAPEMILGYQQASGAFETIASGNPQVRIGVGDQYAYMRRLDIRTQVTSSQSGNANQLPSVALDARMISTPTYLFRCRGIYDHHDMAAAGNWNFALPEAQRLGMRQGIFQQLRSALLYGMNPAGGEGLLNTAGATTETLPADSAGNTTVLTYDHGQMAVYLLGHVQAAMTRTMQLGRQLRVVILGPQRVLGAMEIQQIVQLTSYQRPGGGTDTVGNTVKEVLKGANVQVDWVYDDTLIGKGAGGTDAVVITIPEVEVPMVNSTVNTNEFAKLTPSLAANALMFCDMAAPREIPTPIAGGAIDVLSEMRSTAGWAVRPEAITILSMAYSA
complement(4106774..4107634)	FIG01046602:hypothetical protein	-	N/A	MANLSLNPMATTNALGSFGVQSDGYIQGVALDDPANRFNLAAGTVAPTETKPLWGGLPVAELLPGTSSSPRGSFIRRAVSVAELEGFTVFNQAHNGLTTPQSPVPLYASGMSVSYYRLGSSMRIPLKASAQVVALGTAGASVKTPLAWDFVNNQITTAAAAGFAGSDIATTDVSYASGVATATTASAHGLTAGQYVKISGVAPSAYNGTVVVLSVPSATTFTYTPATAPGGAATTQGTIGAVTLSDITLPVKVLAVETGNSKTVTYDSSTGFLTWNNNDSCALVLL
complement(4107650..4109269)	PHAGE_Burkho_BcepB1A_NC_005886:gp26	phage(gi48697515)	1.47e-15	MAIFGSGIMFRQGKFVFLIQRSDDGTWCQPGGTVEQGELAIDAARREVLEEVGYQYDGPLIPHSVHGDYLTFRAEVPERFEAKLNDESLAAGWFHIDDLPKPLHQPFAEMLARQALNETEVAALIADGTLSSPQFFINMWMFAIRVTGTGVTWRSADQQMAFRNPDDYLTPEFLQRVAGLPLIWLHPEKNTLDSNEFAKRVIGTLTNSWVADNGEVWAIARVYDAEAAEIMATRQLSTSPTVKFVEVPDSIIEIDGQPLLVEPSPELLDHVAICEQGVWDKLLAPTGVKSDSIPNEAEKMDEEKIVALINKAIDARMAKADSEAADLKAKADAEEAAKKEKADAEEKEAEEAKAKADAEEKAAKEKADAEAKEKADTEEAERMAKEKADADVRREIAEL…
complement(4109282..4110106)	FIG01047789:hypothetical protein	-	N/A	MNTFTRTVRDAVKFFLRNGYSSREELERWQAIIRQAAESETADDYMAMVTRNLTKAYDLQVGRAGALKRHQGISRFTLNYLEPQLRTELDRRILASADLIKLNRKKAIDTTLSRFSGWASSIPSADSIALTGIQGTMRETAGHIQKAAEKVDYEARRVMIDQNHKLIANIDNVIATSNNAIAAIWHSHWRRPGYDFREDHKERDQLYYLIRGNWAQKNGYVKAGPAGYLDEITQPGEEVFCQCYVTYIYNIRSIPEYMLTQKGQKFMESMKKAA
complement(4110103..4111524)	FIG01046817:hypothetical protein	-	N/A	MNEDDFEIGSCSHSELMALLDSDDIQPGSTAGYQTCKTVYLYHPLGGKMVDRPIKMAMNEPRTVHVAQSYGLEQRLRDAFEREWKAMGANQHIANAARIARIYGVSAIAMLVDNQEPNESLDYRTLYKHNVSFNILDPLNTAGSIVLNQDPNAQDFQKVDGIRVAGKPYHKSRCVVVQNEDPIYLAYNPAAFGFTGRSVYQRALYPLKSFIQTMRTDDMVAVKGGLLVTKIKGPSSVVNNMMQKLSGIKRMMLKRGKTGEVLQIGESDNIESIDLSNLEKPLDSARKHILENVAAAADMPAIILNSETFAQGFGEGTEDARAVAVYIDNIREWLDSLYAFFIRVCQYRAWSIEFFQSLRADFPELKNTYSVYFASWINNFEYRWPSSLKEPESEKVKVD…
complement(4111536..4112867)	PHAGE_Salmon_SSU5_NC_018843: putative terminase large subunit	phage(gi410491412)	1.85e-16	MADIYLPTLHDGQLKVWSDSWEGQLHAVRCGRRWGKTFMLSSAAVTYATAPFKRPGMDIELGGRVGIFTAEYRQYQEIYDKLEEILLPLKKSFSRQEKRLLLKNGGKIDFWVTNDNKLAGRGREYEIILIDEAAFTKSPEMLREIWPKSIKPTLLTTKGRAYVFSTPDGVDEENFFYAICHDKNLGFIEHHAPTSSNPFVPPEELEKEEANNDPRVFRQEFLAEFVDWSAASLFDIRKWFEGENQDQPVDYPEMCQAVFAVMDTAVKGGSEHDGTAVVYYAVDTRPGIQRLTILDWDVVQIDGALLETWMPSVFDRLNELSGQCVAINGSLGVFIEDASMGSILLQKGESLGWPVNKIESALTSKGKDERAIMASGYHYRGLAKISRYAFEKTAVFKGE…
complement(4112869..4113621)	PHAGE_Entero_933W_NC_000924:putative small subunit terminase	phage(gi9632516)	8.08e-35	MAKPDWGALQHQFLAEHAKSGISPKDWCEAQGLNYASAKRYIKIANSAANSQKKTANQTANSQKGKMRNSTQEKACKGKDKTANKSENSTNSPETKPIRGSRRSPPTNPFKPGNQQALKHGGYGRRMLLSDAITEDAQALTLDDELFWLRAANLTAAENIGRWQAELELANDETAKDLHELISSAEKAMHRNTARIESLEYTKGSIAKLQVDAAYREAATEKVELEIDVMKDGDKDNAIVVHNSLPIPGR
4113709..4114266	p	-	N/A	MKYSQQEKLQIQMLCDIHRALKIKNSFDPDFIDEAVSTDSYWALRWKYPSLDDGEEDPEEVQLFVDTFDMYEILQYTYNHFSDEDKADVAESIPHFNGEASLAFPGFDGNNETNYLTIGGMLKRMGRFSGKEELTKNSHMPSVEIYRRMLEVFLPARAKNWIHDVGITKQDFIDTLNARVHPENR
complement(4114293..4114841)	PROPHAGE_Salmon_LT2:phage-tail assembly-like protein	phage(gi16765210)	7.99e-17	MNLLPVLLKKFWKPLAEILLVAFLLCAGAYWCYSRGYQKADTSWKYQWAQRDLTDATAALQREVTERAKEQRRQHAADEERKRADEELAKIQADADAAERARGGLQQQLAAVQRQLAGSETGRLSAIAAASQAKSETGILLAQLLGEADDLAGKFAKEADERYVAGSTCERTYDKVIRLHDE
complement(4114838..4115464)	PHAGE_Salmon_epsilon15_NC_004775:endolysin	phage(gi30387404)	1.25e-124	MNESQFQQAAGISAELAARWYPHITAAMSEFGITAPLDQAMFIAQAGHESAGFTRLVESFNYSIAGLTGFIRAGRITPDQASTLGRKSCEKALPLERQRAIANLVYSKRMGNNGPGDGWNYRGRGLIQITGLNNYRDCGNGIKTELVAHPDLLAQDTYAARSAAWFFATKGCLKYSGDMVRVTQIINGGQNGIGERRERFEKAKSVLV
complement(4115467..4115814)	PHAGE_Entero_SfV_NC_003444:holin	phage(gi19549036)	1.03e-48	MKMHNDPHSWQGWLELFQSWWRGDTPLGAVLMSLFMAGLRIAYFGGNGGWKKKTLEILLCGALTLTFSSALEYFGWPKSLSVAIGGGVGLIGVDAIRGFAMKFISGRIGGDNNKV
complement(4116009..4116698)	PHAGE_Phage_Gifsy_1_NC_010392:bacteriophage antiterminator protein Q	phage(gi169257244)	4.59e-126	MNTQYLQYVREQLMVATADLSGETKGQLLAWLENAQFDTKNYPRKKQRIWDEETESWITLNNPPIPGKQSLAKGSAIPLVKPVEYSTASWRRAVLSLDEHYKAWLLWNYSENTCWEHQVEITSWAWCEFRQQLAGRKMAGKTVERLKKLIWLAAQDVREGLAGRYVYQQQELASLCGVKPDNWSHNYADYWRAMSNIFKRLDTESLLCLVKTRSQQKATFSQQGIAKVN
complement(4117168..4117407)	PHAGE_Salmon_SEN34_NC_028699:DNA-damage inducible protein I	phage(gi966201471)	2.69e-27	MRIELVISRTKQLPEGAVPALEKELITRLQNQYENCNLTIRRGSQDGLSIVGAADGDKKRIQSILQETWESADDWFYAY
complement(4117563..4117718)	PHAGE_Salmon_SPN3UB_NC_019545:hypothetical protein	phage(gi423262434)	7.3e-31	MWRDQDIAVFVEAARGGIREWSGLNYLAEFVFSCGISLWEVHNKTDRKTPA
complement(4117928..4118485)	PHAGE_Salmon_ST64T_NC_004348:hypothetical protein	phage(gi24371542)	1.58e-124	MKENQIRELVNELRDIAIEYHGTQQLRERIARTVRAALHHDLEKLNQPVSQTYNLPELIEGMEVSIDVSTCDADAGNRYFGTVNEVSELDSAKNGYILLVQDAKPNFDVNGNSPVSPGGWINCSERMPDNDESKPIAIFTGKCLGQGMFVATYDDDGFFDYWEGMEVIGVSHWMPLPAAPEPDQS
complement(4118482..4119393)	PHAGE_Salmon_ST64T_NC_004348:hypothetical protein	phage(gi24371543)	5.71e-105	MTTITSKFTKERLIDWAVVAVAERGRDLKDAPESVEAAANLKLAEIALAALTAEPVAYNQVQRDMMKDIIVRKMGGNLAGEKLVMDDIHAVTMALIDAGFRTAPPVQETGVYKDMLNIIGLLEKNEWAEHCTNTVLGSLLESEITRLVSKEQQAPERERIRRKHAEWSDKTFGDVGPVGPLKHLSKEALEAAADPSDPLEWADMQFLLWDAQRRMGISDEFITRAMIEKLEINKSRQWPEPKDGEPRLHIKEQPAPVVPPAIEPDYEVIKSILPTANPDEYACTIAADMWSACRAAMLNGGKS
complement(4119390..4119863)	PHAGE_Salmon_ST64B_NC_004313:hypothetical protein	phage(gi23505476)	3.96e-44	MNIDKQALREVAEKATKGPWMLFSDIDTKTFSIHTPRDKRCENVIKWGGFDCQPNAEANAEFIAAFNPKVALALLDELDSANGYASAYEAEKWHYHGLSESEGERAERAEKQVEELTMWVKRLAHSLRNAKPNSKLYGAAMDYLSHKGLISVEDVLR
complement(4119860..4120474)	PHAGE_Salmon_SPN1S_NC_016761:hypothetical protein	phage(gi374531240)	1.02e-82	MKERGMIFNAEMVNAILSGRKTQTRRPIKWKQTRFTEIAERDDGSLWPWAEDCERGGDIWFTCPFGEVGDRIWVRETFRVHSRATDVATLVYRASVRNSWTEQTHRVPVAVCNKPATPEKWTPSIHMPRWSSRITLEITDVRVERLNSITESDAEAEGVTDTGFGVLLVDGFRYLWKSIYGDDSWQANPWVWVIEFKRVEGGAA
complement(4120471..4120728)	PHAGE_Salmon_SPN1S_NC_016761:hypothetical protein	phage(gi374531241)	1.48e-52	MSILTILDVGLALMGWLFIMFRAGQWFISVALKQWDRRRKQSRRQKAVNEFYDAFDLSSIEPGTTVRLATKGDLTIMMFRQEAAQ
complement(4120742..4121437)	PHAGE_Escher_HK639_NC_016158:replication protein 14	phage(gi356870655)	2.39e-71	MKPELYRAINNRDGAAMASIAGGNPEHGRVVNSDAERLVDALFMQLKQIFPAATQTNLRSDADERVAKQQWIAAFSENGIRTRKQLSAGMQKARSSQSPFWPSPGQFISWCREGSGVLGVSVDDIMGEYWRWRKLVFRYPTSEQFPWRDKNPLYYHVCLELRRRGTEGQLSEKELHRAAGDILHEWEKRVLAGKPIPPVRRALAAPSRDRGPTPAEMLMAKYKQRKDAGLI
complement(4121434..4122270)	PHAGE_Salmon_SEN34_NC_028699:replication protein O	phage(gi966201463)	1.01e-49	MANTAEVINFPVPDVAHKEPRVADLDDGFTRIANEILEAVMHAGLSQHQLLVFMAVMRKTYGFNKKSDWVSNEQISELTGILPHKCSAAKSVLVKRGILTQTGRVIGINKTVSEWSSLPEKGTEKKTYLKKVNLPESGKKSLPESGNGYYPNQVNTKDTITKDSKDNSNNPPKSPRAVSFDASSVQLPDWLSSITWSSWVEYRRDLKKPIKSQQTVTQAINLLDRCRLNGYTPEEIINRSIANGWQGLFEPDGQAKRSRDIDQESIHWNSPDAWRDFL
complement(4122362..4122511)	PHAGE_Salmon_SEN34_NC_028699:putative DNA-binding protein	phage(gi966201462)	9.45e-28	MAKELAFLGIQAAPPEAVLVSRNYLTAVEILADAGLKAERARPDALGWD
4123847..4124119	hypothetical protein	-	N/A	MKIDLDLKAQGVDVSTSGYRNFVNAEVRGVELEDVLEDIKSDVLFSAIDLSDYIDWADNNSKLPEILDRLSPDEVISWLHENGHLEDNDD
4124112..4124261	PHAGE_Entero_HK022_NC_002166:kil protein	phage(gi19343384)	7.93e-08	MIDHYKLQVAQSELAIAACLGDGELWERAMKKLSIAIGLPWYRRNTVTH
4124342..4124638	PHAGE_Salmon_SEN34_NC_028699:host-nuclease inhibitor Gamma	phage(gi966201456)	1.75e-66	MNAYLTYDRIEAQNWTRHYQQIAREEKESELADDLEKGLSLHMLESLCMDELPRHGANKKAISRAFDDDVEFQERASEFVRYMVEVFSLHQIDIESEE
4124644..4125429	PHAGE_Salmon_SEN34_NC_028699:recombinational DNA repair protein RecT (prophage-associated)	phage(gi966201455)	0	MSTALATLAGKLAERVGMDSVDPQELITTLRQTAFKGDASDAQFIALLIVANQYGLNPWTKEIYAFPDKQNGIVPVVGVDGWSRIINENQQFDGMDFEQDNESCTCRIYRKDRNHPICVTEWMDECRREPFKTRDGREITGPWQSHPKRMLRHKAMIQCARLAFGFAGIYDKDEAERIVENTTYTTDRQTERDITPVSDETMREINDLLITLNKTWDDDLLPLCSQIFRRDIGASSDLTQIEAVKALGFLKQKAAEQKVEA
4125426..4126106	PHAGE_Salmon_SEN34_NC_028699:exonuclease; phage phage-encoded enzyme involved in intergration-recombination	phage(gi966201454)	2.86e-168	MTPEIILARTGIDVSNIEQGDEAWHRLRLGVITASEVHNVISRPKSGKKWTDMKMSYFLTLLAEVCTGVAPEVNARALAWGKQYEDDARTLFEFTTDVKVTGSPILFRDEGMRTACSPDGLCSDGRGLELKCPFTSRDFMKFRLGGFEAIKSAYMAQVQFSMWVTGRDAWYFANYDPRMKREGIHHVVVERDDKYTSLFNEMVPEFIEKMDEALKEIGFTFGEQWR
4126103..4126972	PHAGE_Salmon_SEN34_NC_028699:methyl-directed repair DNA adenine methylase	phage(gi966201453)	0	MTHATTAVLPVEKSVPRTWRRPFLKWAGGKYSLLPELDRLIPAGKRLIEPFVGGGSVFLNSDKHERFLLADVNADLINLYQMLAVVPDSVIAEAIKAFRHLNDAENYTVIREAFNAKKLNATERAAAFLYLNRHCFNGLMRYNLDGFFNVGWGKYKAPYFPEEEIRAFRKKSRACVFMTAGFERTLRLAGDGDVVYCDPPYEPIPGTTGFTSYASGGFSWDSQVALAESCVAAHQRGAKVFISNSTAPRVIELYERHGFTLHRVNARRSISSKGSTRETANDIVASLGI
4126975..4127217	PHAGE_Salmon_SEN34_NC_028699:hypothetical protein	phage(gi966201452)	2.09e-51	MMKLINRSKQSPVGRRACDIALAAHHEKFGDYGRQKHVTNYTVVVDGVKVPVEVVNRATSYVATAMIGVRKLRNLPAQAN
complement(4127581..4128762)	PHAGE_Salmon_SEN34_NC_028699:integrase	phage(gi966201449)	0	MAISDTKLRSVYGKPYSGPSEITDSDGLGIRITPKGIISFQFRFRWDGKQHRMGLGRYPALTLRDARNIVADLRESVDKGIDPRELAGNNKSKKKPTVKDCLDYWEANYVNVALREKTKALYRSTVIKHMSDAFAGVPIEEIPVRLWVERFTDEERLNPRRARQLLVQLRAAIGWCTRRQFISTADLMLLQPKDVGTKPTVGEVTLSYNQLAKIWLAIERSRGSTSNRLLHQLLMLYGARNSELRLAVKEEFDREEGIWTVPAEKSKTNRIIRRPIFDAADQLLKKAEMTYGNILFPGPDLKKSMTIAGANRFLGRIESSLGIGEFSAHDFRRTLATRLSEEGIAPHVIEKMLGHELGGVLSVYNKHDWIAEQKAAYELYAEKIFWHIRKISG
4134119..4134130	attR	-	N/A	CACCATCATCAC
